# Supplementary material for: A chiral ion-pair photoredox organocatalyst: enantioselective anti-Markovnikov hydroetherification of alkenols
Source: Royal Society of Chemistry journal article supplement (doi:10.1039/c6qo00806b), 2017-01-01
Supplement: c6qo00806b1.pdf [file c6qo00806b1.pdf]

# Supporting Information

## Chiral Ion-Pair Photoredox Organocatalyst: Enantioselective Anti-Markovnikov Hydroetherification of Alkenols

Zhongbo Yang,<sup>a</sup> Han Li,<sup>b</sup> Sujia Li,<sup>a</sup> Ming-Tian Zhang,<sup>b</sup> and Sanzhong Luo,<sup>\*a</sup>

<sup>a</sup> Beijing National Laboratory for Molecular Sciences, Institute of Chemistry, the Chinese Academy of Sciences, Beijing, 100190 (China)

<sup>b</sup> Center of Basic Molecular Science (CBMS) Department of Chemistry, Tsinghua University, Beijing, 100084, China

Email: [luosz@iccas.ac.cn](mailto:luosz@iccas.ac.cn)

## **Table of Contents**

|                                                  |            |
|--------------------------------------------------|------------|
| <b>1. General Information and Materials</b>      | <b>S3</b>  |
| <b>2. Optimization of Catalysts and Solvents</b> | <b>S4</b>  |
| <b>3. Experimental Section</b>                   | <b>S6</b>  |
| <b>4. <sup>1</sup>H NMR Investigation</b>        | <b>S18</b> |
| <b>5. Laser Flash Photolysis Studies</b>         | <b>S18</b> |
| <b>6. Stern-Volmer Analysis</b>                  | <b>S18</b> |
| <b>7. References</b>                             | <b>S19</b> |
| <b>8. NMR Spectrums</b>                          | <b>S21</b> |
| <b>9. HPLC Charts</b>                            | <b>S51</b> |

## General Information.

All commercial reagents were used without further purification unless otherwise noted. Proton and carbon magnetic resonance spectra ( $^1\text{H}$  NMR and  $^{13}\text{C}$  NMR) were recorded on Bruker UltraShield 300MHz or 400MHz spectrometer with solvent resonance as the internal standard ( $^1\text{H}$  NMR:  $\text{CDCl}_3$  at 7.26 ppm;  $^{13}\text{C}$  NMR:  $\text{CDCl}_3$  at 77.16 ppm)..  $^1\text{H}$  NMR data were reported as follows: chemical shift, multiplicity (s = singlet, d = doublet, t = triplet, m = multiplet, td = triplet of doublet, dt = doublet of triplet, dd = doublet of doublet), coupling constants (Hz), and integration. Infrared Spectroscopy was conducted on Thermo Fisher Nicolet 6700. High resolution mass spectra were obtained using electrospray ionization (ESI) mass spectrometer. Silica gel (300 – 400 mesh) was for column chromatography. Irradiation of photochemical reactions were carried out using  $32 \times 0.2$  W blue LED floodlamp, with Pyrex glass schlenk tube purchased from Synthware. Stern-Volmer Analyses was performed using the commercially available LP920 system by Edinburgh Instruments, Inc., and laser excitation was provided by a pulsed Nd:YAG laser in combination with an optical parametric oscillator (OPO) for wavelength selection. The enantiomeric excesses were determined by HPLC analysis on Chiral Daicel Chiralpak OD-H, AD-H, AS-H. Optical rotations were measured on a commercial polarimeter and reported as follows:  $[\alpha]_{\text{D}}^{25}$  (c = g/100 mL, solvent). NOTE: A couple of racemic and chiral samples were determined by  $^1\text{H}$  NMR and  $^{13}\text{C}$  NMR. For several samples, the slight deviation of retention time in HPLC most possibly due to the low polarity of eluent.

## Materials.

Compound **1a**<sup>[1]</sup>, **S7** – **S11**<sup>[2]</sup> were prepared according to reported process. Substrate **2a** – **2n** were prepared through method I. Solvents were freshly dried according to *the purification handbook Purification of Laboratory Chemicals* before using. 1,2-dichloroethane (DCE) was degassed by “pump-freeze-thaw” cycles ( $\times 2$ ) before using. Other reagents were obtained from commercial sources and used without further purification. Unless otherwise noted, the reactions were taken under argon.

## Optimization of Solvent, H-atom Donor and Catalyst on Substrate 2a

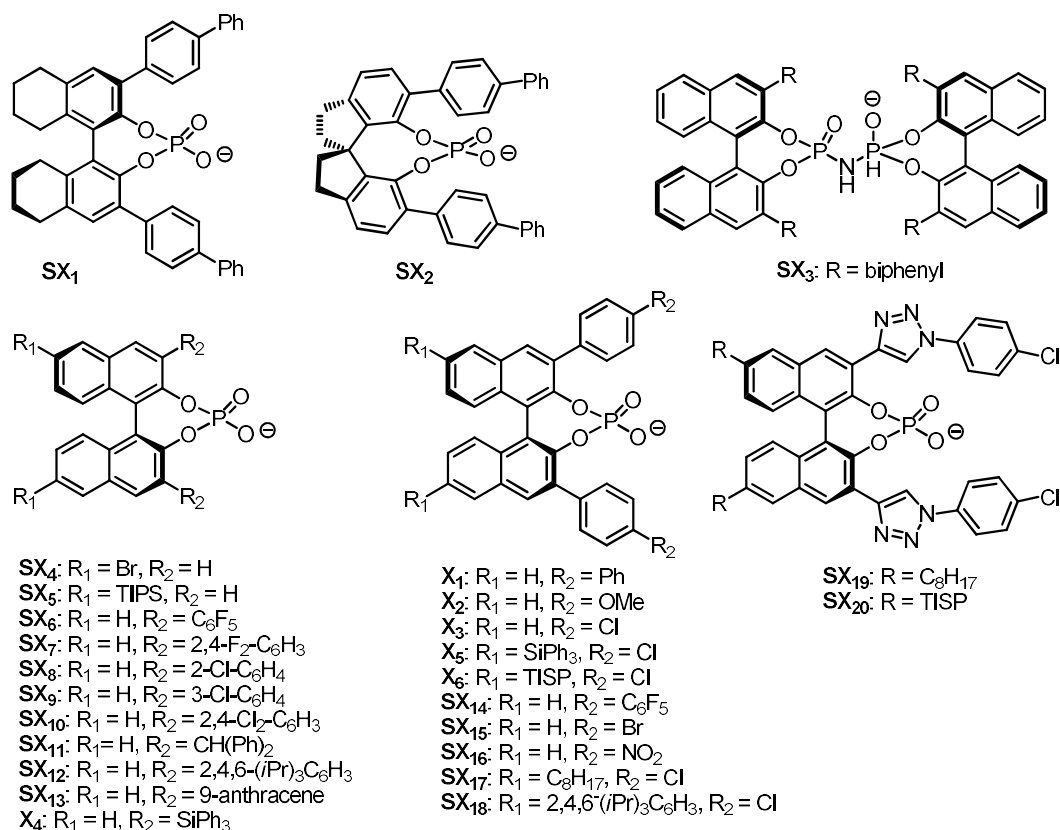

**Table S1. Solvent Optimization on Substrate 2a.**

| Entry | Solvent (concentration)  | Yield <sup>a</sup> (%) | ee <sup>b</sup> (%) |
|-------|--------------------------|------------------------|---------------------|
| 1     | DCM (0.2)                | 83                     | 53                  |
| 2     | CH <sub>3</sub> CN (0.2) | 23                     | 30                  |
| 3     | Toluene (0.2)            | 38                     | 31                  |
| 4     | CHCl <sub>3</sub> (0.2)  | 90                     | 20                  |
| 5     | PhCl (0.2)               | 68                     | 41                  |
| 6     | Ethyl acetate (0.2)      | 83                     | 50                  |
| 7     | THF (0.2)                | < 5                    | --                  |
| 8     | Et <sub>2</sub> O (0.2)  | 85                     | 47                  |
| 9     | Hexane (0.2)             | 38                     | 19                  |
| 10    | DCE (0.2)                | 83                     | 56                  |
| 11    | DCE (0.4)                | 83                     | 56                  |
| 12    | DCE (0.05)               | < 5                    | --                  |

<sup>a</sup> Determined by isolation after chromatographic purification.. <sup>b</sup> Determined by HPLC analysis.

**Table S2. H-atom Donor Optimization on Substrate 2a.**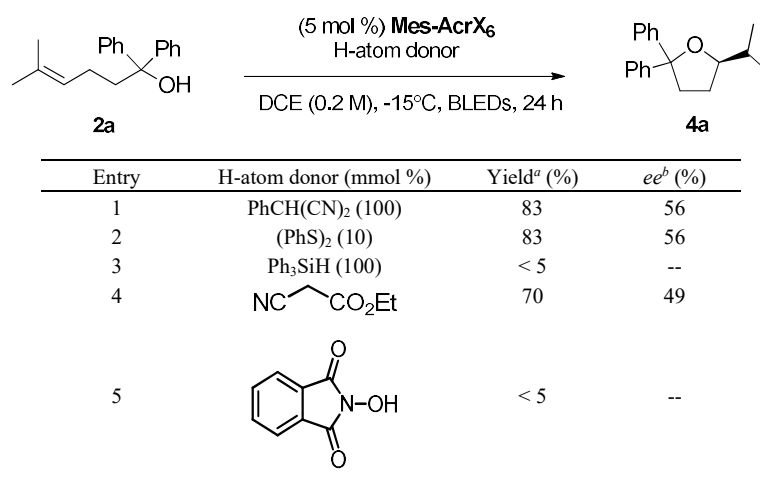

<sup>a</sup> Determined by isolation after chromatographic purification.. <sup>b</sup> Determined by HPLC analysis.

**Table S3. Catalyst Optimization on Substrate 2a.**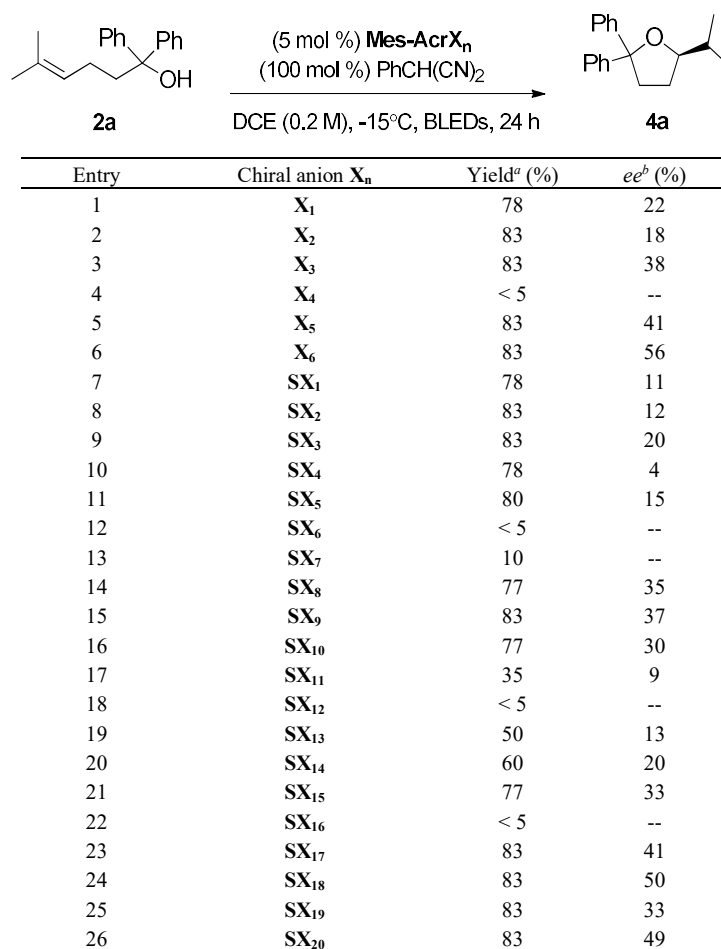

<sup>a</sup> Determined by isolation after chromatographic purification.. <sup>b</sup> Determined by HPLC analysis.

## Experimental Section.

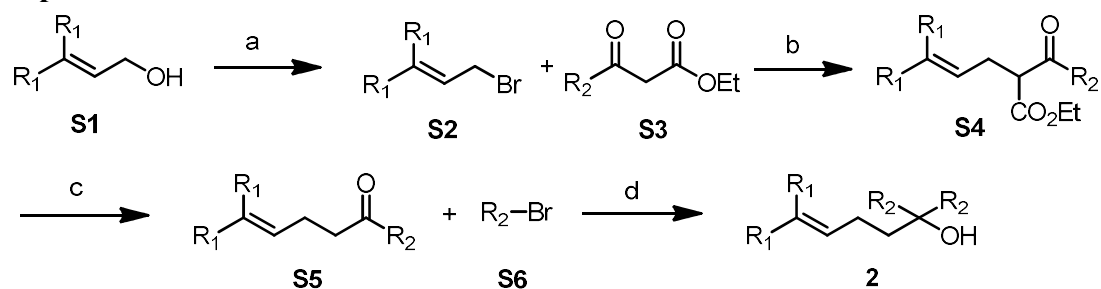

a) PBr<sub>3</sub>, Et<sub>2</sub>O, 0 °C, 30 min. b) NaH, THF, 0 °C - RT, 4 h. c) KOH (aq.), EtOH, reflux, 2 h.  
d) *n*BuLi, THF, -78 °C - RT, overnight.

**Method I:** To a solution of allylic alcohol **S1** (1.0 eq.) dry Et<sub>2</sub>O at 0 °C was added PBr<sub>3</sub> (1.2 eq., in 5 mL of Et<sub>2</sub>O) and the mixture was stirred at this temperature for 30 min. The reaction mixture was quenched with saturated NaHCO<sub>3</sub> carefully at 0 °C. It was partitioned between EtOAc and water. The organic phase was separated. The aqueous phase was extracted three times with EtOAc. The combined EtOAc extract was successively washed with saturated NaHCO<sub>3</sub> and brine, dried over Na<sub>2</sub>SO<sub>4</sub>, and concentrated in *vacuo* to allylic bromide **S2**, which was used in the next step without further purification.

To a solution of β-ketocarbonyl **S3** (1.0 eq.) in dry THF at 0 °C was added NaH (1.5 eq.) and the mixture was stirred at this temperature for 30 min. A solution of allylic bromide **S2** (1.0 eq., in 5 mL of THF) was added via cannula. The resulting solution was warmed to room temperature and stirred overnight, which was quenched with saturated NH<sub>4</sub>Cl at 0 °C. The mixture was partitioned between EtOAc and water. The organic phase was separated and the aqueous phase was extracted three times with EtOAc. The combined EtOAc extract was washed with brine, dried over Na<sub>2</sub>SO<sub>4</sub>, and concentrated in *vacuo*. The residue was purified by silica gel chromatography to give the desired product β-ketocarbonyl **S4**.

To a solution of β-ketocarbonyl **S4** (1.0 eq.) in EtOH at room temperature was added aqueous KOH (4.0 eq., 7.0 M in H<sub>2</sub>O) and the mixture was heated to reflux (92 °C) for 2 h. The resulting solution was cooled to room temperature and removed most EtOH in *vacuo*. It was partitioned between EtOAc and water. The organic phase was separated. The aqueous phase was extracted three times with EtOAc. The combined EtOAc extract was successively washed with brine, dried over Na<sub>2</sub>SO<sub>4</sub>, and concentrated in *vacuo*. The residue was purified by silica gel chromatography to give the desired product ketone **S5**.

To a solution of aryl bromide **S6** (2.0 eq.) in dry THF at -78 °C was slowly added *n*BuLi (2.0 eq., 2.4 M in hexane) and the mixture was stirred at this temperature for 1 h. A solution of ketone **S5** (1.0 eq., in 5 mL of THF) was added via cannula. The resulting solution was stirred at -78 °C for further 1 h and slowly warmed to room temperature overnight. The resulting solution was quenched with saturated NH<sub>4</sub>Cl. The mixture was partitioned between EtOAc and water. The organic phase was separated and the aqueous phase was extracted three times with EtOAc. The combined EtOAc extract was washed with brine, dried over Na<sub>2</sub>SO<sub>4</sub>, and concentrated in *vacuo*. The residue was purified by silica gel chromatography to give the desired substrate **2**.

5-methyl-1,1-diphenylhex-4-en-1-ol (**2a**)

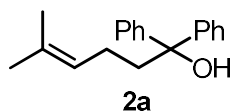

**2a:** following general method I, compound **2a** (45% for 4 steps) was prepared as colorless oil.  $^1\text{H}$  NMR (500 MHz,  $\text{CDCl}_3$ )  $\delta$  7.35 – 7.33 (m, 4H), 7.22 (t,  $J = 7.6$  Hz, 4H), 7.15 – 7.11 (m, 2H), 5.09 (t,  $J = 7.1$  Hz, 1H), 2.28 (s, 1H), 2.26 – 2.23 (m, 2H), 1.94 – 1.91 (m, 2H), 1.59 (s, 3H), 1.38 (s, 3H).  $^{13}\text{C}$  NMR (126 MHz,  $\text{CDCl}_3$ )  $\delta$  147.15, 132.69, 128.26, 126.86, 126.11, 124.25, 78.64, 41.87, 25.86, 22.95, 17.75. IR (thin film,  $\text{cm}^{-1}$ ): 3475, 2956, 2925, 2854, 1447, 699. HRMS (ESI): calcd for  $[\text{C}_{19}\text{H}_{21}\text{OCl}]^+$  265.1598, found 265.1596.

1,1-bis(4-chlorophenyl)-5-methylhex-4-en-1-ol (**2b**)

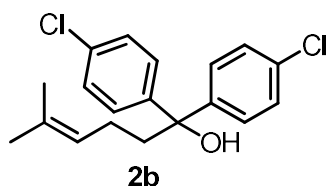

**2b:** following general method I, compound **2b** (40% for 4 steps) was prepared as colorless oil.  $^1\text{H}$  NMR (500 MHz,  $\text{CDCl}_3$ )  $\delta$  7.33 – 7.25 (m, 8H), 5.15 (t,  $J = 7.1$  Hz, 1H), 2.43 (s, 1H), 2.28 – 2.25 (m, 2H), 2.00 – 1.93 (m, 2H), 1.67 (s, 3H), 1.46 (s, 3H).  $^{13}\text{C}$  NMR (126 MHz,  $\text{CDCl}_3$ )  $\delta$  145.28, 133.26, 132.94, 128.47, 127.51, 123.77, 78.04, 41.61, 25.84, 22.83, 17.80. IR (thin film,  $\text{cm}^{-1}$ ): 3471, 2957, 2926, 2854, 1655, 1489, 821. HRMS (ESI): calcd for  $[\text{C}_{19}\text{H}_{19}\text{OCl}_2]^+$  333.0818, found 333.0818.

5-methyl-1,1-di-*o*-tolylhex-4-en-1-ol (**2c**)

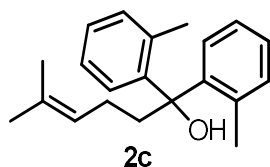

**2c:** following general method I, compound **2c** (48% for 4 steps) was prepared as colorless oil.  $^1\text{H}$  NMR (400 MHz,  $\text{CDCl}_3$ )  $\delta$  7.69 (dd,  $J = 7.7, 1.2$  Hz, 2H), 7.21 – 7.13 (m, 4H), 7.03 (d,  $J = 7.1$  Hz, 2H), 5.15 (t,  $J = 7.2$  Hz, 1H), 2.37 – 2.33 (m, 2H), 1.98 – 1.90 (m, 9H), 1.67 (s, 3H), 1.51 (s, 3H).  $^{13}\text{C}$  NMR (101 MHz,  $\text{CDCl}_3$ )  $\delta$  143.97, 136.25, 132.40, 132.30, 127.21, 127.11, 125.33, 124.46, 78.76, 40.93, 25.84, 22.88, 21.52, 17.76. IR (thin film,  $\text{cm}^{-1}$ ): 3359, 2957, 2921, 2851, 1659, 1633, 1457, 1377, 754. HRMS (ESI): calcd for  $[\text{C}_{21}\text{H}_{25}\text{O}]^+$  293.1911, found 293.1908.

5-methyl-1,1-di-*m*-tolylhex-4-en-1-ol (**2d**)

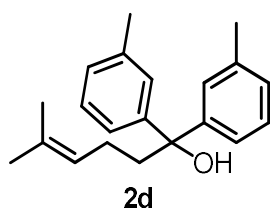

**2d:** following general method I, compound **2d** (46% for 4 steps) was prepared as colorless oil.  $^1\text{H}$

NMR (400 MHz, CDCl<sub>3</sub>)  $\delta$  7.26 – 7.18 (m, 6H), 7.02 (d, *J* = 3.8 Hz, 2H), 5.17 (t, *J* = 7.3 Hz, 1H), 2.36 – 2.27 (m, 9H), 2.01 – 1.97 (m, 2H), 1.67 (s, 3H), 1.48 (s, 3H). <sup>13</sup>C NMR (126 MHz, CDCl<sub>3</sub>)  $\delta$  147.16, 137.76, 132.53, 128.09, 127.56, 126.71, 124.37, 123.17, 78.54, 41.95, 25.86, 22.97, 21.77, 17.74. IR (thin film, cm<sup>-1</sup>): 3476, 3020, 2956, 2924, 2855, 1605, 1456, 789. HRMS (ESI<sup>-</sup>): calcd for [C<sub>21</sub>H<sub>25</sub>O]<sup>-</sup> 293.1911, found 293.1908.

5-methyl-1,1-di-p-tolylhex-4-en-1-ol (**2e**)

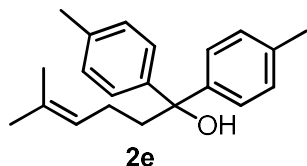

**2e**: following general method I, compound **2e** (50% for 4 steps) was prepared as colorless oil. <sup>1</sup>H NMR (500 MHz, CDCl<sub>3</sub>)  $\delta$  7.30 (d, *J* = 7.9 Hz, 4H), 7.11 (d, *J* = 7.9 Hz, 4H), 5.17 (t, *J* = 7.0 Hz, 1H), 2.35 – 2.26 (m, 9H), 2.02 – 1.97 (m, 2H), 1.68 (s, 3H), 1.49 (s, 3H). <sup>13</sup>C NMR (126 MHz, CDCl<sub>3</sub>)  $\delta$  144.46, 136.34, 132.50, 128.93, 125.99, 124.38, 78.42, 41.94, 25.86, 23.01, 21.11, 17.80. IR (thin film, cm<sup>-1</sup>): 3473, 3023, 2970, 2923, 2856, 1510, 1448, 817. HRMS (ESI<sup>-</sup>): calcd for [C<sub>21</sub>H<sub>25</sub>O]<sup>-</sup> 293.1911, found 293.1908.

1,1-bis(4-chlorophenyl)-4-cyclopentylidenebutan-1-ol (**2f**)

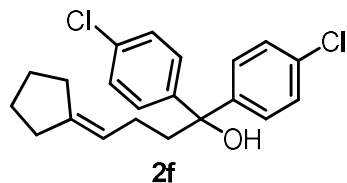

**2f**: following general method I, compound **2f** (40% for 4 steps) was prepared as colorless oil. <sup>1</sup>H NMR (500 MHz, CDCl<sub>3</sub>)  $\delta$  7.30 – 7.29 (m, 4H), 7.24 – 7.21 (m, 4H), 5.23 (d, *J* = 6.9 Hz, 1H), 2.49 (s, 1H), 2.27 – 2.24 (m, 2H), 2.17 – 2.15 (m, 2H), 1.97 – 1.92 (m, 4H), 1.61 – 1.52 (m, 4H). <sup>13</sup>C NMR (126 MHz, CDCl<sub>3</sub>)  $\delta$  145.28, 145.15, 132.88, 128.43, 127.48, 119.17, 78.08, 41.38, 33.75, 28.72, 26.42, 26.35, 24.42. IR (thin film, cm<sup>-1</sup>): 3478, 2954, 2927, 2855, 1671, 1489, 1400, 1093, 1013, 819. HRMS (ESI<sup>-</sup>): calcd for [C<sub>21</sub>H<sub>21</sub>OCl<sub>2</sub>]<sup>-</sup> 359.0975, found 359.0971.

1,1-bis(4-chlorophenyl)-4-cyclohexylidenebutan-1-ol (**2g**)

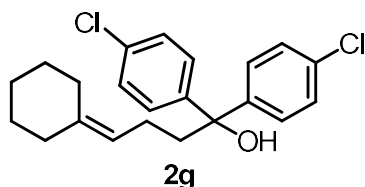

**2g**: following general method I, compound **2g** (45% for 4 steps) was prepared as colorless oil. <sup>1</sup>H NMR (400 MHz, CDCl<sub>3</sub>)  $\delta$  7.30 – 7.28 (m, 4H), 7.25 – 7.22 (m, 4H), 5.08 (t, *J* = 7.3 Hz, 1H), 2.48 (s, 1H), 2.24 (dd, *J* = 8.7, 6.5 Hz, 2H), 2.02 – 1.89 (m, 6H), 1.48 – 1.39 (m, 6H). <sup>13</sup>C NMR (101 MHz, CDCl<sub>3</sub>)  $\delta$  145.31, 141.48, 132.92, 128.46, 127.51, 120.52, 78.22, 41.91, 37.26, 28.76, 28.64, 27.83, 26.91, 21.98. IR (thin film, cm<sup>-1</sup>): 3578, 3489, 2927, 2853, 1593, 1489, 1093, 822. HRMS (ESI<sup>-</sup>): calcd for [C<sub>22</sub>H<sub>23</sub>OCl<sub>2</sub>]<sup>-</sup> 373.1131, found 373.1127.



1,1-bis(4-chlorophenyl)-4-cycloheptylidenebutan-1-ol (**2h**)

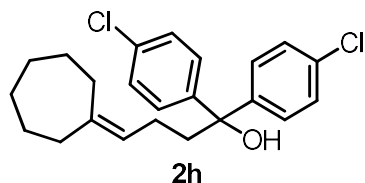

**2h**: following general method I, compound **2h** (40% for 4 steps) was prepared as colorless oil.  $^1\text{H}$  NMR (400 MHz,  $\text{CDCl}_3$ )  $\delta$  7.29 (d,  $J = 8.6$  Hz, 4H), 7.23 (d,  $J = 8.7$  Hz, 4H), 5.12 (t,  $J = 7.1$  Hz, 1H), 2.40 (s, 1H), 2.24 (dd,  $J = 8.9, 6.6$  Hz, 2H), 2.15 – 2.12 (m, 2H), 2.01 – 1.91 (m, 4H), 1.49 – 1.43 (m, 8H).  $^{13}\text{C}$  NMR (101 MHz,  $\text{CDCl}_3$ )  $\delta$  145.31, 143.12, 132.95, 128.48, 127.53, 123.96, 78.13, 41.65, 37.95, 30.12, 29.97, 29.40, 29.29, 27.10, 22.43. IR (thin film,  $\text{cm}^{-1}$ ): 3727, 2956, 2923, 2852, 1489, 1094, 821. HRMS (ESI $^-$ ): calcd for  $[\text{C}_{23}\text{H}_{25}\text{OCl}_2]^-$  387.1288, found 387.1284.

1,1,5,5-tetraphenylpent-4-en-1-ol (**2i**)

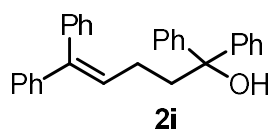

**2i**: following general method I, compound **2i** (50% for 4 steps) was prepared as colorless viscous oil.  $^1\text{H}$  NMR (400 MHz,  $\text{CDCl}_3$ )  $\delta$  7.35 – 7.08 (m, 18H), 7.10 (dd,  $J = 7.7, 1.6$  Hz, 2H), 6.11 (t,  $J = 7.7$  Hz, 1H), 2.43 – 2.39 (m, 2H), 2.18 – 2.12 (m, 2H), 2.07 (s, 1H).  $^{13}\text{C}$  NMR (101 MHz,  $\text{CDCl}_3$ )  $\delta$  146.91, 142.70, 142.39, 140.01, 129.87, 129.24, 128.35, 128.28, 128.21, 127.28, 127.05, 127.02, 126.93, 126.07, 78.35, 42.10, 24.61. IR (thin film,  $\text{cm}^{-1}$ ): 3559, 3359, 2921, 2851, 1659, 1633, 1598, 1494, 1446, 761, 699. HRMS (ESI $^-$ ): calcd for  $[\text{C}_{29}\text{H}_{25}\text{O}]^-$  389.1911, found 389.1915.

5,5-bis(4-chlorophenyl)-1,1-diphenylpent-4-en-1-ol (**2j**)

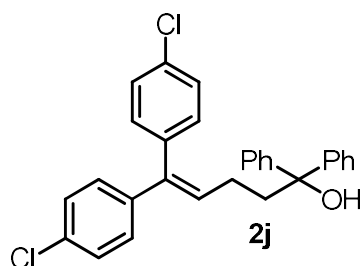

**2j**: following general method I, compound **2j** (30% for 4 steps) was prepared as colorless viscous oil.  $^1\text{H}$  NMR (500 MHz,  $\text{CDCl}_3$ )  $\delta$  7.32 – 7.19 (m, 14H), 7.06 (d,  $J = 8.6$  Hz, 2H), 6.97 (d,  $J = 8.3$  Hz, 2H), 6.08 (t,  $J = 7.7$  Hz, 1H), 2.39 – 2.36 (m, 2H), 2.14 – 2.06 (m, 3H).  $^{13}\text{C}$  NMR (126 MHz,  $\text{CDCl}_3$ )  $\delta$  146.71, 140.73, 140.10, 137.90, 133.16, 133.06, 131.16, 130.43, 128.70, 128.49, 128.43, 128.34, 127.07, 126.03, 78.29, 41.87, 24.61. IR (thin film,  $\text{cm}^{-1}$ ): 3059, 3027, 2957, 2926, 2854, 1722, 1491, 1447, 1288, 1091, 829, 700. HRMS (ESI $^-$ ): calcd for  $[\text{C}_{29}\text{H}_{23}\text{OCl}_2]^-$  457.1131, found 457.1128.

5,5-bis(4-fluorophenyl)-1,1-diphenylpent-4-en-1-ol (**2k**)

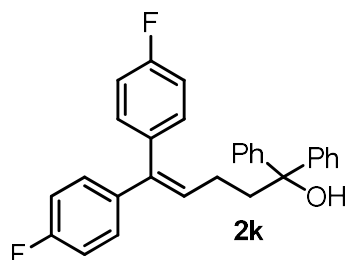

**2k**: following general method I, compound **2k** (25% for 4 steps) was prepared as colorless viscous oil.  $^1\text{H}$  NMR (500 MHz,  $\text{CDCl}_3$ )  $\delta$  7.33 – 7.31 (m, 4H), 7.27 – 7.24 (m, 4H), 7.20 (t,  $J = 7.2$  Hz, 2H), 7.10 (dd,  $J = 8.6, 5.5$  Hz, 2H), 7.25 – 6.90 (m, 6H), 6.02 (t,  $J = 7.7$  Hz, 1H), 2.40 – 2.37 (m, 2H), 2.13 – 2.09 (m, 2H), 2.05 (s, 1H).  $^{13}\text{C}$  NMR (126 MHz,  $\text{CDCl}_3$ )  $\delta$  163.18, 162.99, 161.22, 161.04, 146.79, 140.30, 138.71, 138.68, 135.65, 135.62, 131.42, 131.36, 129.55, 128.81, 128.75, 128.32, 127.04, 126.04, 115.44, 115.27, 115.16, 114.99, 78.32, 41.97, 24.60. IR (thin film,  $\text{cm}^{-1}$ ): 3359, 2921, 2851, 1601, 1508, 1223, 835, 700. HRMS (ESI): calcd for  $[\text{C}_{29}\text{H}_{23}\text{OF}_2]^+$  425.1722, found 425.1718.

5,5-bis(4-methoxyphenyl)-1,1-diphenylpent-4-en-1-ol (**2l**)

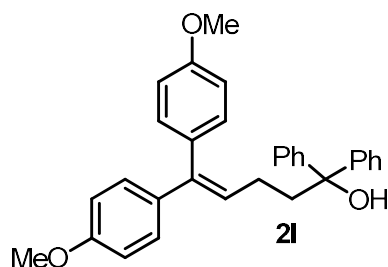

**2l**: following general method I, compound **2l** (30% for 4 steps) was prepared as light yellow viscous oil.  $^1\text{H}$  NMR (400 MHz,  $\text{CDCl}_3$ )  $\delta$  7.35 – 7.33 (m, 4H), 7.28 – 7.24 (m, 4H), 7.21 – 7.17 (m, 2H), 7.12 – 7.10 (m, 2H), 7.01 – 6.98 (m, 2H), 6.85 – 6.77 (m, 4H), 5.97 (t,  $J = 7.6$  Hz, 1H), 3.83 (s, 3H), 3.78 (s, 3H), 2.42 – 2.38 (m, 2H), 2.17 – 2.12 (m, 3H).  $^{13}\text{C}$  NMR (101 MHz,  $\text{CDCl}_3$ )  $\delta$  158.84, 158.60, 146.97, 141.41, 135.80, 132.51, 130.96, 128.42, 128.26, 127.28, 126.89, 126.08, 113.71, 113.56, 78.40, 55.41, 55.37, 42.20, 24.55. IR (thin film,  $\text{cm}^{-1}$ ): 3559, 2921, 2850, 1660, 1633, 1606, 1511, 1245, 1033, 831, 701. HRMS (ESI): calcd for  $[\text{C}_{31}\text{H}_{29}\text{O}_3]^+$  449.2122, found 449.2119.

(*E*)-5-(4-methoxyphenyl)-1,1-diphenylpent-4-en-1-ol (**2m**)

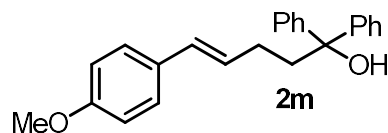

**2m**: following general method I, compound **2m** (40% for 4 steps) was prepared as slight yellow viscous oil.  $^1\text{H}$  NMR (400 MHz,  $\text{CDCl}_3$ )  $\delta$  7.38 (d,  $J = 7.8$  Hz, 4H), 7.26 (t,  $J = 7.7$  Hz, 4H), 7.19 – 7.15 (m, 4H), 6.76 (d,  $J = 8.6$  Hz, 2H), 6.23 (d,  $J = 15.8$  Hz, 1H), 6.06 – 6.00 (m, 1H), 3.73 (s, 3H), 2.42 – 2.38 (m, 2H), 2.17 – 2.13 (m, 3H).  $^{13}\text{C}$  NMR (101 MHz,  $\text{CDCl}_3$ )  $\delta$  158.84, 147.01, 130.59, 129.64, 128.38, 128.33, 127.14, 127.01, 126.16, 114.05, 78.41, 55.40, 41.70, 27.70. IR (thin film,  $\text{cm}^{-1}$ ): 3445, 2920, 2849, 1634, 1608, 1510, 1246, 700. HRMS (ESI): calcd for  $[\text{C}_{24}\text{H}_{23}\text{O}_2]^+$  343.1704, found 343.1708.

(*E*)-1,1-diphenyl-5-(thiophen-2-yl)pent-4-en-1-ol (**2n**)

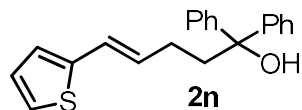

**2n**: following general method I, compound **2n** (28% for 4 steps) was prepared as colorless viscous oil. <sup>1</sup>H NMR (500 MHz, CDCl<sub>3</sub>) δ 7.42 (d, *J* = 7.5 Hz, 4H), 7.32 (t, *J* = 7.7 Hz, 4H), 7.25 – 7.22 (m, 2H), 7.07 (d, *J* = 5.0 Hz, 1H), 6.91 (dd, *J* = 5.0, 3.6 Hz, 1H), 6.83 (d, *J* = 3.4 Hz, 1H), 6.47 (d, *J* = 15.7 Hz, 1H), 6.06 (dt, *J* = 15.5, 6.9 Hz, 1H), 2.46 – 2.43 (m, 2H), 2.21 – 2.16 (m, 3H). <sup>13</sup>C NMR (101 MHz, CDCl<sub>3</sub>) δ 146.93, 143.01, 130.57, 128.38, 127.34, 127.09, 126.17, 124.48, 123.53, 123.38, 78.33, 41.53, 27.55. IR (thin film, cm<sup>-1</sup>): 3359, 3024, 2955, 2922, 2851, 1717, 1447, 1287, 697. HRMS (ESI): calcd for [C<sub>21</sub>H<sub>19</sub>OS]<sup>+</sup> 319.1162, found 319.1158.

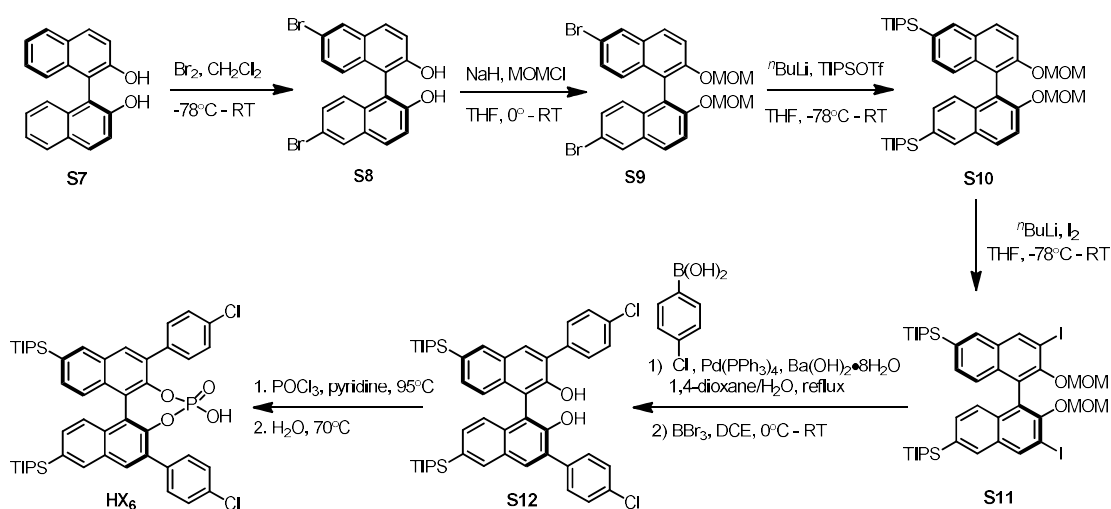

(*S*)-(3,3'-bis(4-chlorophenyl)-2,2'-bis(methoxymethoxy)-[1,1'-binaphthalene]-6,6'-diyl)bis(triisopropylsilane) (**S12**)

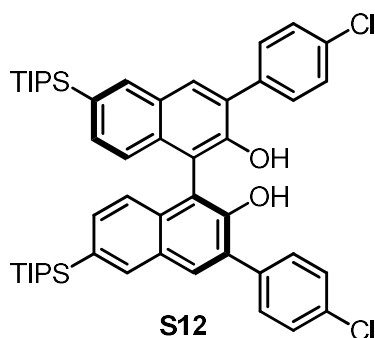

In a flask, **S11** (1.0 g, 1.07 mmol), (4-chlorophenyl)boronic acid (0.40 g, 2.57 mmol), Pd(PPh<sub>3</sub>)<sub>4</sub> (0.185 g, 0.16 mmol), and Ba(OH)<sub>2</sub> (1.69 g, 5.35 mmol) were combined and purged with nitrogen. A mixture of 3:1 dioxane : H<sub>2</sub>O (16 mL) was added and then stirred with reflux for 24 h. The resulting reaction was cooled to room temperature, then diluted with 1M HCl and DCM until a homogeneous biphasic solution resulted. The aqueous layer was extracted twice with DCE. The combined organic layers were washed with water and brine. The organic layer was then dried over

Na<sub>2</sub>SO<sub>4</sub> and concentrated under vacuum form the reaction residue, which was dissolved in DCE (16 mL). 12M HCl (5.0 mL) was added into above mixture at room temperature. The reaction was heated to reflux for 6 h, then cooled to room temperature. The mixture was partitioned between DCE and water. The organic phase was separated and the aqueous phase was extracted three times with DCE. The combined DCE extract was washed with saturated aqueous NaHCO<sub>3</sub>, dried over Na<sub>2</sub>SO<sub>4</sub>, and concentrated in *vacuo*. The residue was purified by silica gel chromatography to give the desired product **S12** (0.526 g, 60%) as a white solid. <sup>1</sup>H NMR (500 MHz, CDCl<sub>3</sub>) δ 8.05 (d, J = 20.0 Hz, 4H), 7.72 – 7.70 (m, 4H), 7.46 – 7.44 (m, 6H), 7.25 (d, J = 8.4 Hz, 2H), 5.35 (s, 2H), 1.47 (dt, J = 14.9, 7.5 Hz, 6H), 1.11 (dd, J = 7.5, 3.8 Hz, 36H). <sup>13</sup>C NMR (126 MHz, CDCl<sub>3</sub>) δ 150.54, 136.59, 136.24, 133.84, 133.81, 133.01, 132.03, 131.18, 131.11, 129.32, 129.15, 128.65, 122.88, 111.86, 18.79, 18.77, 11.05. HRMS (ESI): calcd for [C<sub>50</sub>H<sub>59</sub>O<sub>2</sub>Cl<sub>2</sub>Si<sub>2</sub>]<sup>-</sup> 817.3436, found 817.3427.

(4*R*,11*bS*)-2,6-bis(4-chlorophenyl)-4-hydroxy-9,14-bis(triisopropylsilyl)dinaphtho[2,1-*d*:1',2'-*f*][1,3,2]dioxaphosphepine 4-oxide (**HX<sub>6</sub>**)

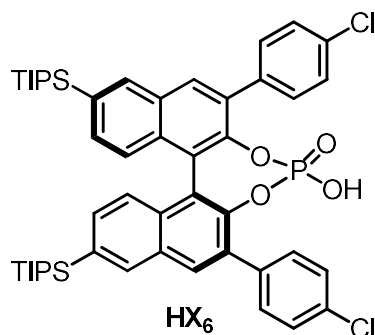

To a solution of **S12** (0.5 g, 0.61 mmol) in pyridine (5.0 mL) was added dropwise freshly distilled POCl<sub>3</sub> (170 μL, 1.83 mmol) over 1 min. The resultant mixture was stirred at 95 °C for 12 h, upon which H<sub>2</sub>O (5.0 mL) was cautiously added. Heating was continued at 70 °C for an additional 12 h. The reaction mixture was then cooled to ambient temperature and poured into chilled 6 M aqueous HCl. The reaction mixture was extracted with DCE. The organic phase was separated and the aqueous phase was extracted three times with DCE. The combined DCE extract was washed with brine, dried over Na<sub>2</sub>SO<sub>4</sub>, and concentrated in *vacuo*. The residue was purified by silica gel chromatography to give the desired product **HX<sub>6</sub>** (0.484 g, 90%) as a white solid. <sup>1</sup>H NMR (500 MHz, CDCl<sub>3</sub>) δ 8.10 (s, 2H), 7.99 (s, 2H), 7.55 – 7.26 (m, 12H), 1.50 (dt, J = 14.9, 7.4 Hz, 6H), 1.12 (dd, J = 7.4, 1.6 Hz, 36H). <sup>13</sup>C NMR (126 MHz, CDCl<sub>3</sub>) δ 144.29, 136.34, 135.36, 133.89, 133.49, 132.72, 132.61, 132.59, 132.22, 131.71, 131.18, 131.08, 128.49, 125.80, 122.44, 18.72, 18.70, 10.98. HRMS (ESI): calcd for [C<sub>50</sub>H<sub>58</sub>O<sub>4</sub>Cl<sub>2</sub>PSi<sub>2</sub>]<sup>-</sup> 879.2994, found 879.2984.

**General procedure I for photoinduced enantioselective anti-Markovnikov hydroetherification of 2a.** To a flame-dried Schlenk tube equipped with a magnetic stir bar was added **Mes-AcrBF<sub>4</sub>** (5 mol %) and **NaX<sub>6</sub>** (5 mol %). The mixture was diluted with 0.5 mL of anhydrous chloroform. After stirring for 15 min under dark, the solvent was removed in *vacuo*. Then **2a** (0.05 mmol) and 2-phenylmalononitrile (100 mol %) was added. Following the mixture diluted with 0.25 mL DCE in glove box, the reaction was irradiated with Blue LEDs in -15 °C for 24 h. Upon completion, the reaction mixture was concentrated in *vacuo*. The residue was purified by silica gel chromatography (1% EtOAc in Petroleum ether) to give **4a** (11.0 mg, 83% yield, 56% *ee*).

Reaction temperature was -25 °C, 70% yield, 60% *ee*).

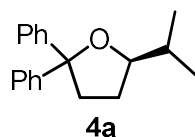

5-isopropyl-2,2-diphenyltetrahydrofuran (**4a**):  $[\alpha]_{\text{D}}^{25} = -2.6^{\circ}$  ( $c = 0.35$ ,  $\text{CHCl}_3$ , 60% *ee*). HPLC analysis: Daicel Chiralpak OD-H, 0.1% *iso*-propanol/hexane, flow rate = 0.5 mL/min,  $\lambda = 216$  nm, retention time: 15.5 min (minor), 22.1 min (major).  $^1\text{H}$  NMR (500 MHz,  $\text{CDCl}_3$ )  $\delta$  7.48 – 7.44 (m, 4H), 7.31 – 7.25 (m, 4H), 7.21 – 7.16 (m, 2H), 3.75 (q,  $J = 7.2$  Hz, 1H), 2.68 – 2.62 (m, 1H), 2.50 – 2.44 (m, 1H), 1.96 – 1.89 (m, 1H), 1.81 – 1.77 (m, 1H), 1.72 – 1.65 (m, 1H), 1.08 (d,  $J = 6.6$  Hz, 3H), 0.89 (d,  $J = 6.7$  Hz, 3H).  $^{13}\text{C}$  NMR (126 MHz,  $\text{CDCl}_3$ )  $\delta$  147.62, 147.04, 128.25, 128.08, 126.64, 126.55, 126.05, 125.91, 87.65, 84.45, 39.23, 33.65, 29.20, 19.68, 18.69. IR (thin film,  $\text{cm}^{-1}$ ): 3444, 2956, 2922, 2851, 1633, 1470, 1055, 701. HRMS (APCI<sup>+</sup>): calcd for  $[\text{C}_{19}\text{H}_{23}\text{O}]^+$  267.1743, found 267.1738.

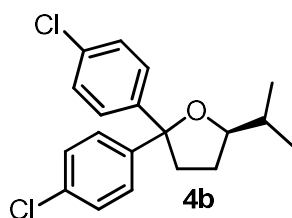

2,2-bis(4-chlorophenyl)-5-isopropyltetrahydrofuran (**4b**): the product **4b** (82% yield, 53% *ee*) was synthesized according to the general procedure I.  $[\alpha]_{\text{D}}^{25} = -4.0^{\circ}$  ( $c = 0.85$ ,  $\text{CHCl}_3$ ). HPLC analysis: Daicel Chiralpak OD-H, 0.1% *iso*-propanol/hexane, flow rate = 0.3 mL/min,  $\lambda = 221$  nm, retention time: 19.1 min (major), 20.0 min (minor).  $^1\text{H}$  NMR (500 MHz,  $\text{CDCl}_3$ )  $\delta$  7.37 – 7.33 (m, 4H), 7.27 – 7.22 (m, 4H), 3.72 (q,  $J = 7.3$  Hz, 1H), 2.59 – 2.54 (m, 1H), 2.44 – 2.39 (m, 1H), 1.92 (td,  $J = 13.4$ , 6.9 Hz, 1H), 1.76 – 1.65 (m, 2H), 1.05 (d,  $J = 6.6$  Hz, 3H), 0.87 (d,  $J = 6.7$  Hz, 3H).  $^{13}\text{C}$  NMR (126 MHz,  $\text{CDCl}_3$ )  $\delta$  145.70, 145.22, 132.71, 132.60, 128.51, 128.32, 127.40, 127.26, 86.87, 84.78, 39.13, 33.61, 29.19, 19.57, 18.67. IR (thin film,  $\text{cm}^{-1}$ ): 2962, 2923, 2876, 2848, 1488, 1091, 1055, 1008, 825. HRMS (APCI<sup>+</sup>): calcd for  $[\text{C}_{19}\text{H}_{21}\text{OCl}_2]^+$  335.0964, found 335.0968.

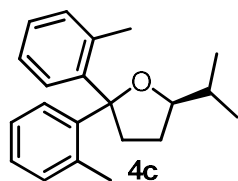

5-isopropyl-2,2-di-*o*-tolyltetrahydrofuran (**4c**): the product **4c** (54% yield, 33% *ee*) was synthesized according to the general procedure I.  $[\alpha]_{\text{D}}^{25} = -11.0^{\circ}$  ( $c = 0.4$ ,  $\text{CHCl}_3$ ). HPLC analysis: Daicel Chiralpak OD-H, 0.1% *iso*-propanol/hexane, flow rate = 0.2 mL/min,  $\lambda = 218$  nm, retention time: 29.4 min (major), 31.4 min (minor).  $^1\text{H}$  NMR (500 MHz,  $\text{CDCl}_3$ )  $\delta$  7.67 (d,  $J = 7.7$  Hz, 1H), 7.58 (d,  $J = 7.5$  Hz, 1H), 7.16 – 7.11 (m, 4H), 7.04 – 7.00 (m, 2H), 3.62 (q,  $J = 7.4$  Hz, 1H), 2.69 – 2.63 (m, 1H), 2.50 – 2.44 (m, 1H), 2.05 – 1.98 (m, 7H), 1.79 – 1.69 (m, 2H), 0.99 (d,  $J = 6.6$  Hz, 3H), 0.84 (d,  $J = 6.6$  Hz, 3H).  $^{13}\text{C}$  NMR (126 MHz,  $\text{CDCl}_3$ )  $\delta$  144.02, 143.44, 136.85, 136.32, 132.32, 132.07, 127.02, 126.98, 126.80, 126.38, 124.99, 124.86, 88.37, 84.08, 36.65, 33.69, 29.50, 21.77,

21.67, 19.67, 18.87.. IR (thin film,  $\text{cm}^{-1}$ ): 2958, 2927, 2871, 1460, 1046, 753. HRMS (APCI<sup>+</sup>): calcd for  $[\text{C}_{21}\text{H}_{27}\text{O}_3]^+$  295.2056, found 295.2054.

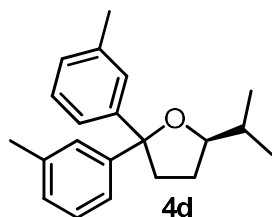

5-isopropyl-2,2-di-m-tolyltetrahydrofuran (**4d**): the product **4d** (50% yield, 59% *ee*) was synthesized according to the general procedure I.  $[\alpha]_{\text{D}}^{25} = -4.3^\circ$  ( $c = 0.30$ ,  $\text{CHCl}_3$ ). HPLC analysis: Daicel Chiralpak OD-H, 0.2% *iso*-propanol/hexane, flow rate = 0.5 mL/min,  $\lambda = 214$  nm, retention time: 7.9 min (minor), 8.2 min (major).  $^1\text{H}$  NMR (500 MHz,  $\text{CDCl}_3$ )  $\delta$  7.28 – 7.23 (m, 4H), 7.16 (dtd,  $J = 10.3, 7.5, 2.7$  Hz, 2H), 7.00 – 6.97 (m, 2H), 3.74 (q,  $J = 7.4$  Hz, 1H), 2.63 – 2.61 (m, 1H), 2.45 – 2.42 (m, 1H), 2.32 (d,  $J = 6.5$  Hz, 6H), 1.92 – 1.89 (m, 1H), 1.80 – 1.78 (m, 1H), 1.68 – 1.66 (m, 1H), 1.08 (d,  $J = 3.7$  Hz, 3H), 0.88 (d,  $J = 3.7$  Hz, 3H)..  $^{13}\text{C}$  NMR (126 MHz,  $\text{CDCl}_3$ )  $\delta$  147.64, 147.05, 137.74, 137.52, 128.08, 127.91, 127.38, 127.28, 126.73, 126.59, 123.09, 122.97, 87.63, 84.33, 39.15, 33.60, 29.85, 29.07, 21.80, 19.71, 18.63. IR (thin film,  $\text{cm}^{-1}$ ): 2922, 2851, 1727, 1467, 1284, 1121, 1073. HRMS (APCI<sup>+</sup>): calcd for  $[\text{C}_{21}\text{H}_{27}\text{O}]^+$  295.2056, found 295.2059.

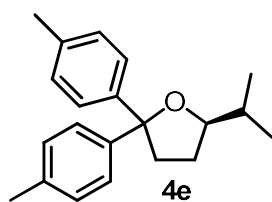

5-isopropyl-2,2-di-p-tolyltetrahydrofuran (**4e**): the product **4e** (77% yield, 50% *ee*) was synthesized according to the general procedure I.  $[\alpha]_{\text{D}}^{25} = -5.0^\circ$  ( $c = 0.30$ ,  $\text{CHCl}_3$ ). HPLC analysis: Daicel Chiralpak AD-H x 2, 0.5% *iso*-propanol/hexane, flow rate = 0.5 mL/min,  $\lambda = 223$  nm, retention time: 16.4 min (minor), 17.0 min (major).  $^1\text{H}$  NMR (500 MHz,  $\text{CDCl}_3$ )  $\delta$  7.34 – 7.30 (m, 4H), 7.08 (dd,  $J = 17.4, 7.1$  Hz, 4H), 3.72 (dd,  $J = 14.3, 7.2$  Hz, 1H), 2.63 – 2.58 (m, 1H), 2.44 – 2.38 (m, 1H), 2.29 (d,  $J = 8.7$  Hz, 6H), 1.92 – 1.88 (m, 1H), 1.79 – 1.76 (m, 1H), 1.68 – 1.65 (m, 1H), 1.06 (dd,  $J = 6.6, 1.6$  Hz, 3H), 0.87 (dd,  $J = 6.7, 1.6$  Hz, 3H).  $^{13}\text{C}$  NMR (126 MHz,  $\text{CDCl}_3$ )  $\delta$  144.93, 144.24, 136.09, 135.99, 128.94, 128.75, 125.96, 125.80, 87.47, 84.29, 39.20, 33.63, 29.85, 29.19, 21.12, 19.68, 18.66. IR (thin film,  $\text{cm}^{-1}$ ): 3358, 3192, 2956, 2851, 1659, 1633, 1470. HRMS (APCI<sup>+</sup>): calcd for  $[\text{C}_{15}\text{H}_{27}\text{O}]^+$  295.2056, found 295.2051.

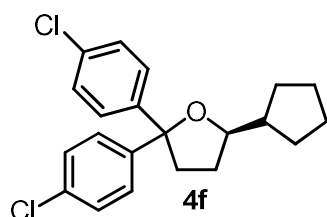

2,2-bis(4-chlorophenyl)-5-cyclopentyltetrahydrofuran (**4f**): the product **4f** (80% yield, 50% *ee*) was synthesized according to the general procedure I.  $[\alpha]_{\text{D}}^{25} = -9.1^\circ$  ( $c = 0.55$ ,  $\text{CHCl}_3$ ). HPLC analysis:

Daicel Chiralpak OD-H, 0.1% *iso*-propanol/hexane, flow rate = 0.3 mL/min,  $\lambda$  = 223 nm, retention time: 19.8 min (major), 20.9 min (minor).  $^1\text{H}$  NMR (400 MHz,  $\text{CDCl}_3$ )  $\delta$  7.37 – 7.33 (m, 4H), 7.26 – 7.22 (m, 4H), 3.85 (dd,  $J$  = 14.8, 7.3 Hz, 1H), 2.60 - 2.53 (m, 1H), 2.48 – 2.41 (m, 1H), 2.02 – 1.89 (m, 3H), 1.68 – 1.61 (m, 4H), 1.53 - 1.47 (m, 2H), 1.21 – 1.16 (m, 2H).  $^{13}\text{C}$  NMR (126 MHz,  $\text{CDCl}_3$ )  $\delta$  145.84, 145.30, 132.70, 132.59, 128.49, 128.31, 127.43, 127.30, 86.90, 83.77, 45.51, 39.21, 30.55, 30.12, 29.16, 25.77, 25.72. IR (thin film,  $\text{cm}^{-1}$ ): 2951, 2920, 2873, 2854, 1489, 1089, 1055, 819. HRMS (APCI $^+$ ): calcd for  $[\text{C}_{21}\text{H}_{23}\text{OCl}_2]^+$  366.1121, found 366.1117.

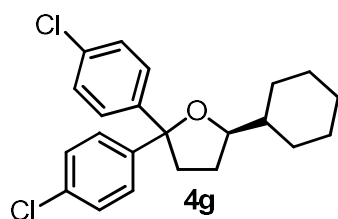

2,2-bis(4-chlorophenyl)-5-cyclohexyltetrahydrofuran (**4g**): the product **4g** (85% yield, 64% *ee*) was synthesized according to the general procedure I.  $[\alpha]_{\text{D}}^{25} = -5.4^\circ$  ( $c = 0.65$ ,  $\text{CHCl}_3$ ). HPLC analysis: Daicel Chiralpak OD-H, 0.1% *iso*-propanol/hexane, flow rate = 1.0 mL/min,  $\lambda$  = 207 nm, retention time: 6.1 min (major), 6.7 min (minor).  $^1\text{H}$  NMR (400 MHz,  $\text{CDCl}_3$ )  $\delta$  7.37 – 7.32 (m, 4H), 7.27 – 7.23 (m, 4H), 3.74 (q,  $J$  = 7.4 Hz, 1H), 2.56 (dt,  $J$  = 12.5, 7.4 Hz, 1H), 2.41 (ddd,  $J$  = 12.5, 8.3, 6.2 Hz, 1H), 2.11 – 1.89 (m, 3H), 1.75 – 1.66 (m, 6H), 1.47 – 1.43 (m, 1H), 1.21 – 0.97 (m, 3H).  $^{13}\text{C}$  NMR (101 MHz,  $\text{CDCl}_3$ )  $\delta$  145.78, 145.29, 132.71, 132.60, 128.51, 128.33, 127.41, 127.27, 86.67, 83.79, 43.41, 39.05, 30.07, 29.24, 29.15, 26.73, 26.15, 26.10. IR (thin film,  $\text{cm}^{-1}$ ): 3359, 2923, 2852, 1633, 1489, 1092, 1013, 822. HRMS (APCI $^+$ ): calcd for  $[\text{C}_{22}\text{H}_{25}\text{OCl}_2]^+$  375.1277, found 375.1272.

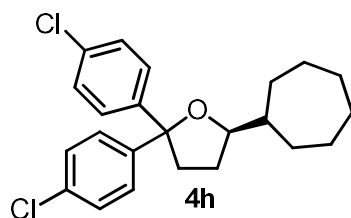

2,2-bis(4-chlorophenyl)-5-cycloheptyltetrahydrofuran (**4h**): the product **4h** (80% yield, 54% *ee*) was synthesized according to the general procedure I.  $[\alpha]_{\text{D}}^{25} = -2.4^\circ$  ( $c = 0.50$ ,  $\text{CHCl}_3$ ). HPLC analysis: Daicel Chiralpak OD-H, 0.1% *iso*-propanol/hexane, flow rate = 0.3 mL/min,  $\lambda$  = 213 nm, retention time: 17.9 min (major), 19.0 min (minor).  $^1\text{H}$  NMR (500 MHz,  $\text{CDCl}_3$ )  $\delta$  7.36 – 7.32 (m, 4H), 7.26 – 7.22 (m, 4H), 3.79 (q,  $J$  = 7.2 Hz, 1H), 2.57 (dt,  $J$  = 12.6, 7.5 Hz, 1H), 2.44 – 2.39 (m, 1H), 2.03 – 2.01 (m, 1H), 1.92 (dd,  $J$  = 12.7, 6.2 Hz, 1H), 1.72 - 1.62 (m, 6H), 1.52 – 1.34 (m, 6H), 1.19 – 1.17 (m, 1H).  $^{13}\text{C}$  NMR (126 MHz,  $\text{CDCl}_3$ )  $\delta$  145.75, 145.23, 132.71, 132.58, 128.52, 128.32, 127.43, 127.26, 86.69, 83.73, 44.74, 39.21, 30.86, 30.49, 29.36, 28.74, 28.55, 26.99, 26.89. IR (thin film,  $\text{cm}^{-1}$ ): 2920, 2851, 1663, 1631, 1489, 1457, 1394, 1096, 824. HRMS (APCI $^+$ ): calcd for  $[\text{C}_{23}\text{H}_{27}\text{OCl}_2]^+$  389.1434, found 389.1428.

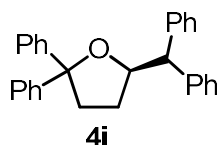

5-benzhydryl-2,2-diphenyltetrahydrofuran (**4i**): the product **4i** (80% yield, 13% *ee*) was synthesized according to the general procedure I.  $[\alpha]_{\text{D}}^{25} = -2.4^{\circ}$  ( $c = 0.25$ ,  $\text{CHCl}_3$ ). HPLC analysis: Daicel Chiralpak AD-H, 0.5% *iso*-propanol/hexane, flow rate = 1.0 mL/min,  $\lambda = 218$  nm, retention time: 6.0 min (minor), 6.4 min (major).  $^1\text{H}$  NMR (500 MHz,  $\text{CDCl}_3$ )  $\delta$  7.44 – 7.15 (m, 20H), 4.84 (q,  $J = 7.5$  Hz, 1H), 4.05 (d,  $J = 8.4$  Hz, 1H), 2.64 – 2.59 (m, 1H), 2.40 – 2.34 (m, 1H), 1.88 (dd,  $J = 12.8, 6.5$  Hz, 1H), 1.76 (dd,  $J = 12.9, 6.7$  Hz, 1H).  $^{13}\text{C}$  NMR (126 MHz,  $\text{CDCl}_3$ )  $\delta$  147.35, 146.95, 143.06, 143.00, 129.03, 128.77, 128.53, 128.31, 128.24, 128.05, 126.72, 126.58, 126.52, 126.26, 125.89, 125.84, 88.58, 80.82, 57.40, 38.71, 30.90. IR (thin film,  $\text{cm}^{-1}$ ): 3650, 3567, 1721, 1505, 1644, 1541. HRMS (APCI<sup>+</sup>): calcd for  $[\text{C}_{29}\text{H}_{27}\text{O}]^+$  391.2056, found 391.2052.

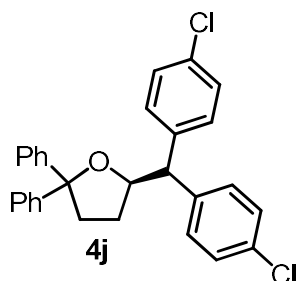

5-(bis(4-chlorophenyl)methyl)-2,2-diphenyltetrahydrofuran (**4j**): the product **4j** (80% yield, 9% *ee*) was synthesized according to the general procedure I.  $[\alpha]_{\text{D}}^{25} = -2.0^{\circ}$  ( $c = 0.35$ ,  $\text{CHCl}_3$ ). HPLC analysis: Daicel Chiralpak OD-H, 1.0% *iso*-propanol/hexane, flow rate = 1.0 mL/min,  $\lambda = 223$  nm, retention time: 7.0 min (minor), 8.2 min (major).  $^1\text{H}$  NMR (400 MHz,  $\text{CDCl}_3$ )  $\delta$  7.40 (d,  $J = 7.8$  Hz, 2H), 7.32 – 7.14 (m, 16H), 4.74 (q,  $J = 7.1$  Hz, 1H), 3.98 (d,  $J = 8.2$  Hz, 1H), 2.62 (dt,  $J = 12.7, 7.2$  Hz, 1H), 2.36 (ddd,  $J = 12.5, 8.2, 6.7$  Hz, 1H), 1.90 (td,  $J = 13.9, 7.0$  Hz, 1H), 1.72 (dt,  $J = 15.1, 7.0$  Hz, 1H).  $^{13}\text{C}$  NMR (126 MHz,  $\text{CDCl}_3$ )  $\delta$  146.99, 146.62, 141.05, 140.86, 132.60, 132.32, 130.38, 130.00, 128.80, 128.47, 128.40, 128.14, 126.86, 126.75, 125.76, 125.73, 88.82, 80.44, 56.02, 38.45, 30.78. IR (thin film,  $\text{cm}^{-1}$ ): 3360, 2920, 2850, 1659, 1633, 1490, 1471, 1091. HRMS (APCI<sup>+</sup>): calcd for  $[\text{C}_{29}\text{H}_{25}\text{OCl}_2]^+$  459.1278, found 459.1273.

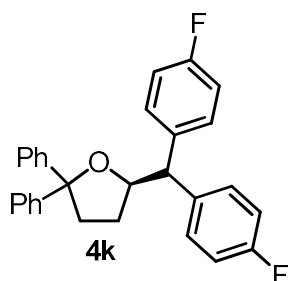

5-(bis(4-fluorophenyl)methyl)-2,2-diphenyltetrahydrofuran (**4k**): the product **4k** (77% yield, 10% *ee*) was synthesized according to the general procedure I.  $[\alpha]_{\text{D}}^{25} = -0.9^{\circ}$  ( $c = 0.45$ ,  $\text{CHCl}_3$ ). HPLC analysis: Daicel Chiralpak OD-H, 1.0% *iso*-propanol/hexane, flow rate = 1.0 mL/min,  $\lambda = 227$  nm, retention time: 7.5 min (minor), 8.8 min (major).  $^1\text{H}$  NMR (500 MHz,  $\text{CDCl}_3$ )  $\delta$  7.41 (d,  $J = 7.7$  Hz, 2H), 7.33 – 7.14 (m, 12H), 6.95 (dt,  $J = 15.3, 8.7$  Hz, 4H), 4.74 (q,  $J = 7.2$  Hz, 1H), 4.01 (d,  $J = 8.1$



Hz, 1H), 2.64–2.58 (m, 1H), 2.35–2.30 (m, 1H), 1.89 (dq,  $J = 14.0, 7.0$  Hz, 1H), 1.73 (dt,  $J = 14.9, 7.0$  Hz, 1H).  $^{13}\text{C}$  NMR (126 MHz,  $\text{CDCl}_3$ )  $\delta$  162.64, 160.69, 147.08, 146.72, 138.64, 138.31, 130.47, 130.41, 130.13, 130.07, 128.38, 128.12, 126.83, 126.71, 125.78, 125.77, 115.50, 115.33, 115.14, 114.97, 88.75, 80.76, 55.68, 38.48, 30.77. IR (thin film,  $\text{cm}^{-1}$ ): 3839, 3649, 1603, 1507, 1224, 824. HRMS (APCI $^+$ ): calcd for  $[\text{C}_{29}\text{H}_{25}\text{OF}_2]^+$  427.1868, found 427.1863.

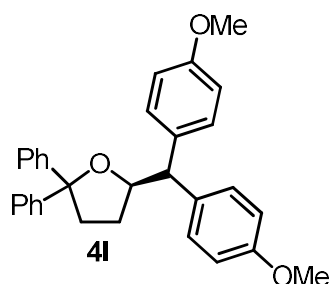

5-(bis(4-methoxyphenyl)methyl)-2,2-diphenyltetrahydrofuran (**4l**): the product **4l** (90% yield, 8% *ee*) was synthesized according to the general procedure I.  $[\alpha]_{\text{D}}^{25} = 0.5^\circ$  ( $c = 0.65$ ,  $\text{CHCl}_3$ ). HPLC analysis: Daicel Chiralpak AS-H, 2.5% *iso*-propanol/hexane, flow rate = 1.0 mL/min,  $\lambda = 190$  nm, retention time: 7.7 min (major), 9.1 min (minor).  $^1\text{H}$  NMR (500 MHz,  $\text{CDCl}_3$ )  $\delta$  7.44 (d,  $J = 7.8$  Hz, 2H), 7.35 (d,  $J = 7.8$  Hz, 2H), 7.30–7.13 (m, 10H), 6.82 (d,  $J = 8.5$  Hz, 2H), 6.77 (d,  $J = 8.5$  Hz, 2H), 4.74 (q,  $J = 7.3$  Hz, 1H), 3.96 (d,  $J = 8.3$  Hz, 1H), 3.79 (s, 3H), 3.75 (s, 3H), 2.62–2.57 (m, 1H), 2.37–2.31 (m, 1H), 1.87 (dd,  $J = 12.8, 6.6$  Hz, 1H), 1.74 (dd,  $J = 12.5, 7.4$  Hz, 1H).  $^{13}\text{C}$  NMR (126 MHz,  $\text{CDCl}_3$ )  $\delta$  158.13, 157.97, 147.39, 147.00, 135.68, 135.53, 129.88, 129.62, 128.30, 128.03, 126.69, 126.56, 125.90, 125.88, 113.86, 113.59, 88.55, 81.14, 55.58, 55.33, 38.68, 30.85. IR (thin film,  $\text{cm}^{-1}$ ): 2921, 2834, 1608, 1509, 1463, 1447, 1246, 1176, 1033, 703. HRMS (APCI $^+$ ): calcd for  $[\text{C}_{31}\text{H}_{31}\text{O}_3]^+$  451.2268, found 451.2261.

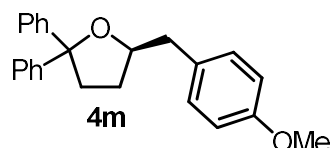

5-(4-methoxybenzyl)-2,2-diphenyltetrahydrofuran (**4m**): the product **4m** (88% yield, 3% *ee*) was synthesized according to the general procedure I.  $[\alpha]_{\text{D}}^{25} = -0.6^\circ$  ( $c = 0.50$ ,  $\text{CHCl}_3$ ). HPLC analysis: Daicel Chiralpak AS-H, 1.0% *iso*-propanol/hexane, flow rate = 1.0 mL/min,  $\lambda = 214$  nm, retention time: 6.4 min (minor), 7.4 min (major).  $^1\text{H}$  NMR (500 MHz,  $\text{CDCl}_3$ )  $\delta$  7.44 (t,  $J = 8.6$  Hz, 4H), 7.29–7.25 (m, 4H), 7.20–7.15 (m, 4H), 6.82 (d,  $J = 8.4$  Hz, 2H), 4.32 (p,  $J = 6.7$  Hz, 1H), 3.78 (s, 3H), 3.07 (dd,  $J = 13.6, 5.9$  Hz, 1H), 2.73 (dd,  $J = 13.6, 7.2$  Hz, 1H), 2.63–2.58 (m, 1H), 2.50–2.45 (m, 1H), 1.91 (dd,  $J = 12.5, 6.8$  Hz, 1H), 1.72 (dd,  $J = 12.4, 7.1$  Hz, 1H).  $^{13}\text{C}$  NMR (126 MHz,  $\text{CDCl}_3$ )  $\delta$  158.17, 147.41, 146.87, 131.07, 130.45, 128.26, 128.11, 126.70, 126.67, 126.03, 125.99, 113.80, 88.36, 80.20, 55.38, 41.75, 38.77, 30.90. IR (thin film,  $\text{cm}^{-1}$ ): 3445, 2920, 2849, 1634, 1608, 1510, 1246, 700. HRMS (APCI $^+$ ): calcd for  $[\text{C}_{24}\text{H}_{25}\text{O}_2]^+$  345.1849, found 345.1844.

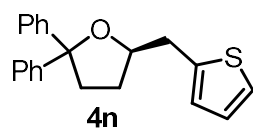

2,2-diphenyl-5-(thiophen-2-ylmethyl)tetrahydrofuran (**4n**): the product **4n** (75% yield, 2% *ee*) was synthesized according to the general procedure I.  $[\alpha]_{\text{D}}^{25} = -3.1^{\circ}$  ( $c = 0.35$ ,  $\text{CHCl}_3$ ). HPLC analysis: Daicel Chiralpak OD-H, 1.0% *iso*-propanol/hexane, flow rate = 1.0 mL/min,  $\lambda = 231$  nm, retention time: 6.6 min (minor), 7.4 min (major).  $^1\text{H}$  NMR (400 MHz,  $\text{CDCl}_3$ )  $\delta$  7.49 – 7.45 (m, 4H), 7.31 – 7.26 (m, 4H), 7.20 – 7.14 (m, 3H), 6.94 (dd,  $J = 5.1, 3.4$  Hz, 1H), 6.88 - 6.87 (m, 1H), 4.37 (p,  $J = 6.6$  Hz, 1H), 3.27 (dd,  $J = 14.7, 6.1$  Hz, 1H), 3.05 (dd,  $J = 14.7, 6.7$  Hz, 1H), 2.69 – 2.63 (m, 1H), 2.54 – 2.47 (m, 1H), 2.02 (tt,  $J = 14.3, 7.1$  Hz, 1H), 1.81 – 1.75 (m, 1H).  $^{13}\text{C}$  NMR (126 MHz,  $\text{CDCl}_3$ )  $\delta$  147.18, 146.60, 141.06, 128.32, 128.17, 126.77, 126.77, 126.73, 125.94, 125.94, 125.71, 123.97, 88.64, 79.46, 38.63, 36.83, 31.03, 0.15. IR (thin film,  $\text{cm}^{-1}$ ): 3359, 2920, 2850, 1659, 1633, 1471, 1447, 1049, 696. HRMS (APCI<sup>+</sup>): calcd for  $[\text{C}_{21}\text{H}_{21}\text{OS}]^+$  321.1308, found 321.1303.

### **$^1\text{H}$ NMR Investigation**

**Figure 2b:** To a solution of **X<sub>6</sub>Na** (0.01 mmol) in  $\text{CD}_2\text{Cl}_2$  (0.5 mL) at room temperature was added **Mes-AcrBF<sub>4</sub>** (0.01 mmol). The mixture was stirred under dark for 15 min. The reaction mixture was conducted to  $^1\text{H}$  NMR detection without further purification.

**Figure 2c:** To a solution of **HX<sub>6</sub>** (0.01 mmol) in  $\text{CD}_2\text{Cl}_2$  (0.5 mL) at room temperature was added **Mes-AcrBF<sub>4</sub>** (0.01 mmol). The mixture was stirred under dark for 15 min. The reaction mixture was conducted to  $^1\text{H}$  NMR detection without further purification.

### Laser Flash Photolysis Studies.

Laser Flash Photolysis/Transient Absorption was performed using the commercially available LP920 system by Edinburgh Instruments, Inc. Laser excitation was provided by a pulsed Nd:YAG laser in combination with an optical parametric oscillator (OPO) for wavelength selection. Probe light was generated by a 450 W Xe lamp. Typical experiments employed laser excitation at 435 nm with single wavelength transient absorption monitored at the indicated wavelengths (1.0 nm bandwidths) with a photomultiplier tube (PMT) and transient spectra recorded using a gated CCD at the indicated time delays (10 ns gate width) unless otherwise indicated. Laser Flash photolysis experiments were performed on a 50  $\mu\text{M}$  solution of **Mes-AcrBF<sub>4</sub>** and chiral photocatalyst **Mes-AcrX<sub>6</sub>** in DCE. Pure argon was bubbled through the solution for 20 min before test. Transient absorption kinetics were conducted at 480 nm corresponding to the the transient absorption spectrum for triplet **Mes-Acr<sup>+</sup>**. Transient absorption kinetics were fit in Origin.

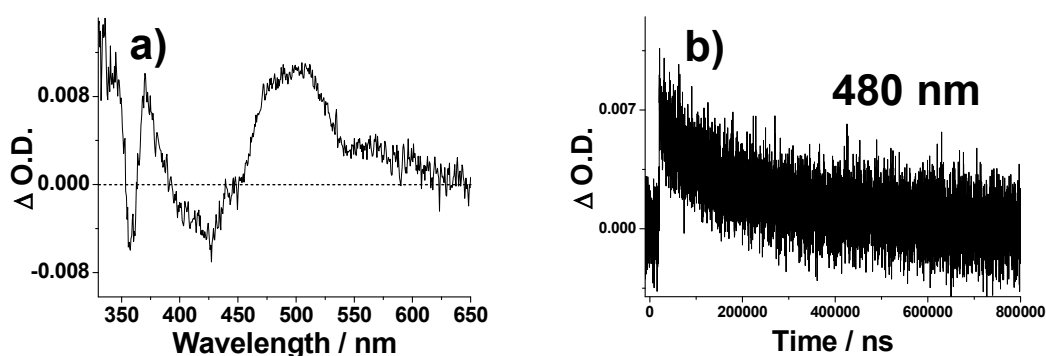

**Figure 3.** a) Transient absorption spectrum for **Mes-AcrX<sub>6</sub>** taken at 10 ns. b) Transient absorption kinetics for **Mes-AcrX<sub>6</sub>** measured at 480 nm. Conditions: [**Mes-AcrX<sub>6</sub>**]= 50  $\mu\text{M}$  in DCE;  $\lambda_{\text{ex}}$  = 435 nm; Ar atmosphere.

### Stern-Volmer Analyses.

Stern-Volmer experiments<sup>[3]</sup> were conducted with detection at 510 nm, where the solutions in DCE contained **Mes-AcrBF<sub>4</sub>** ( $1.6 \times 10^{-5}$  M) or **Mes-AcrX<sub>6</sub>** ( $1.6 \times 10^{-5}$  M) and the quencher **2a** ranging from  $3.0 \times 10^{-4}$  to  $1.6 \times 10^{-3}$  M in concentration. Stern-Volmer analysis was conducted according to the following relationship:

$$\frac{\tau_0}{\tau} = 1 + K_{SV}[Q] = 1 + k_q\tau_0[Q]$$

where  $\tau_0$  and  $\tau$  are the fluorescence lifetime in the absence and presence of quencher  $Q$ ,  $K_{SV}$  is the Stern-Volmer constant,  $k_q$  is the bimolecular quenching constant, and  $[Q]$  is the concentration of quencher.

| [Q] [2a] (mM)                                                                                               | $k_{\text{obs}}$ (ns <sup>-1</sup> ) | [Q] [2a] (mM)                                                                                               | $k_{\text{obs}}$ (ns <sup>-1</sup> ) |
|-------------------------------------------------------------------------------------------------------------|--------------------------------------|-------------------------------------------------------------------------------------------------------------|--------------------------------------|
| 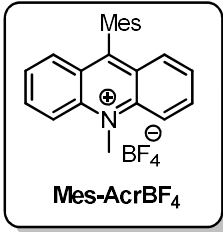<br>Mes-AcrBF <sub>4</sub> |                                      | <br>Mes-AcrX <sub>6</sub> |                                      |
| 0                                                                                                           | 0.1107                               | 0                                                                                                           | 0.1106                               |
| 0.300                                                                                                       | 0.1109                               | 0.657                                                                                                       | 0.1135                               |
| 0.900                                                                                                       | 0.1142                               | 1.201                                                                                                       | 0.1143                               |
| 1.500                                                                                                       | 0.1172                               | 1.562                                                                                                       | 0.1166                               |

**Table S4.** Fluorescence lifetime of **Mes-AcrBF<sub>4</sub>** (16 μM in DCE) and **Mes-AcrX<sub>6</sub>** (16 μM in DCE) measured at 510 nm at the concentrations of quencher **2a**. Pseudo-first-order rate constants  $k_{\text{obs}} = 1/\tau$ .

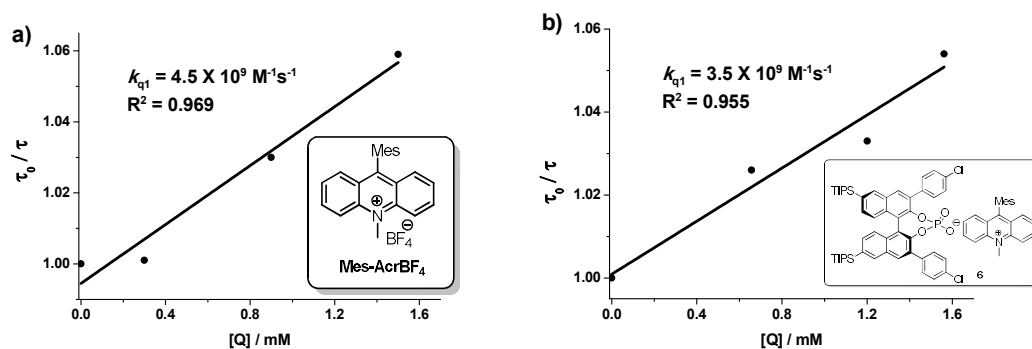

**Figure S1.** Stern–Volmer plots of quenching of **Mes-Acr<sup>+</sup>** (in DCE) fluorescence lifetime for quencher **2a** studied. **Mes-Acr<sup>+</sup>** fluorescence lifetime was measured with the laser flash photolysis spectrometer at 510 nm. a) Stern–Volmer plots for **Mes-AcrBF<sub>4</sub>**; b) Stern–Volmer plots for **Mes-AcrX<sub>6</sub>**. The Stern–Volmer quenching constant,  $K_{\text{SV}}$ , was determined by the slope of the linear regression, where the bimolecular quenching constant,  $k_{\text{q}}$ , is equal to  $K_{\text{SV}}/\tau_0$ . Conditions: [**Mes-Acr<sup>+</sup>**] = 16 μM;  $\lambda_{\text{ex}}$  = 435 nm; Ar atmosphere.

## References.

- [1] D. S. Hamilton; D. A. Nicewicz. *J. Am. Chem. Soc.* **2012**, *134*, 18577.
- [2] F. Romanov-Michailidis; L. Guénée; A. Alexakis. *Org. Lett.* **2013**, *15*, 5890.
- [3] N. Romero,; D. A. Nicewicz, *J. Am. Chem. Soc.*, **2014**, *136*, 17024.

# NMR Spectrums.

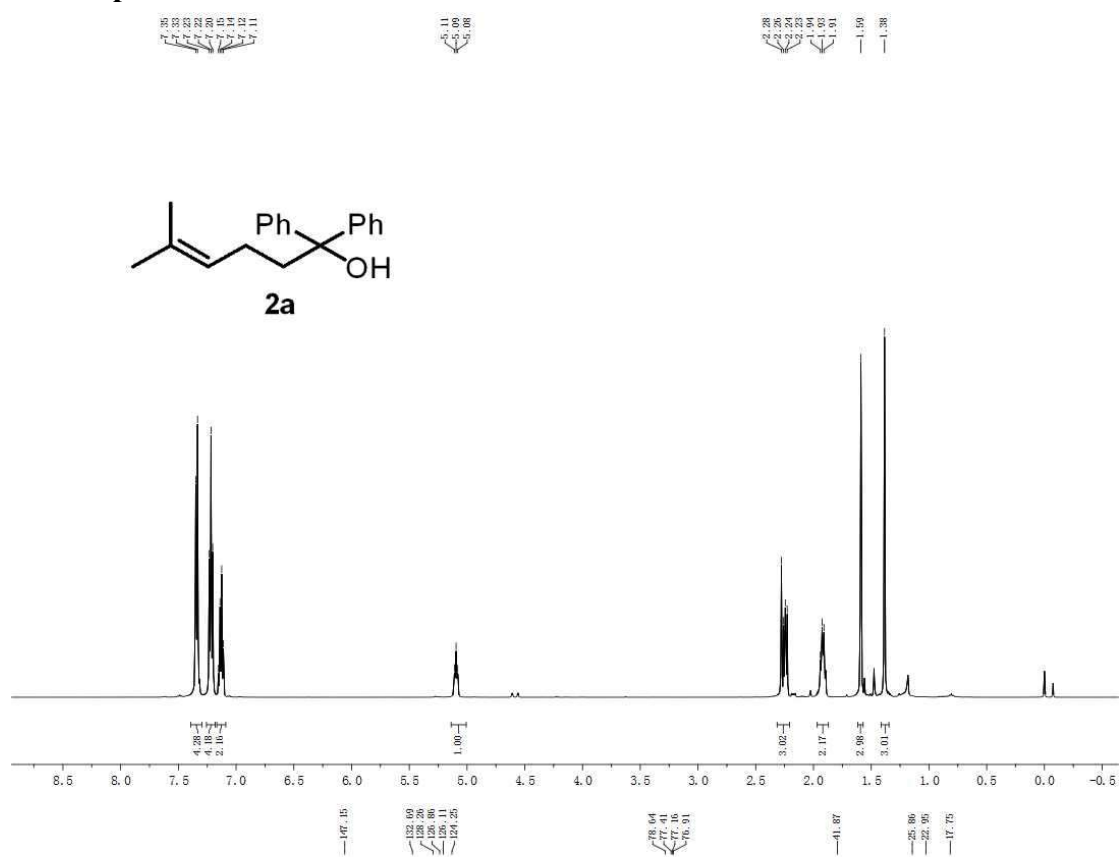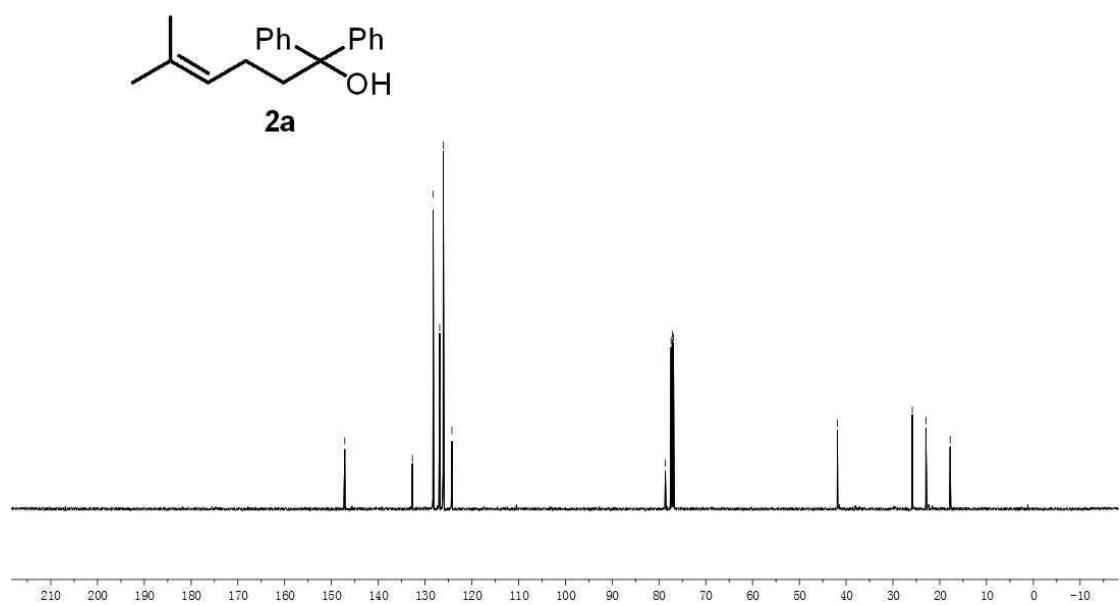

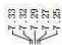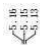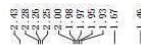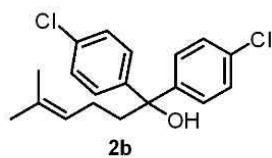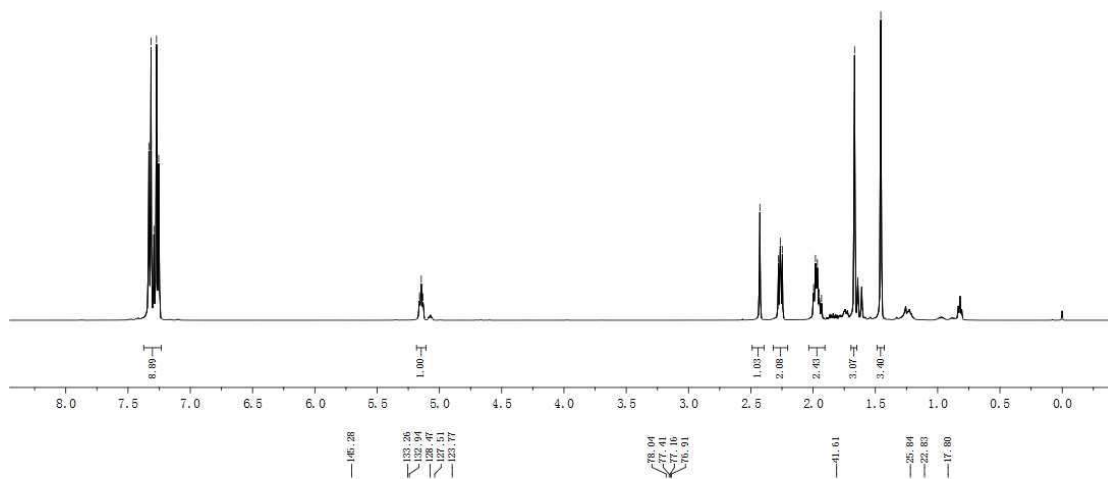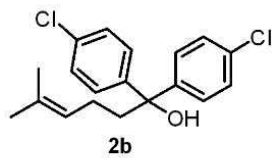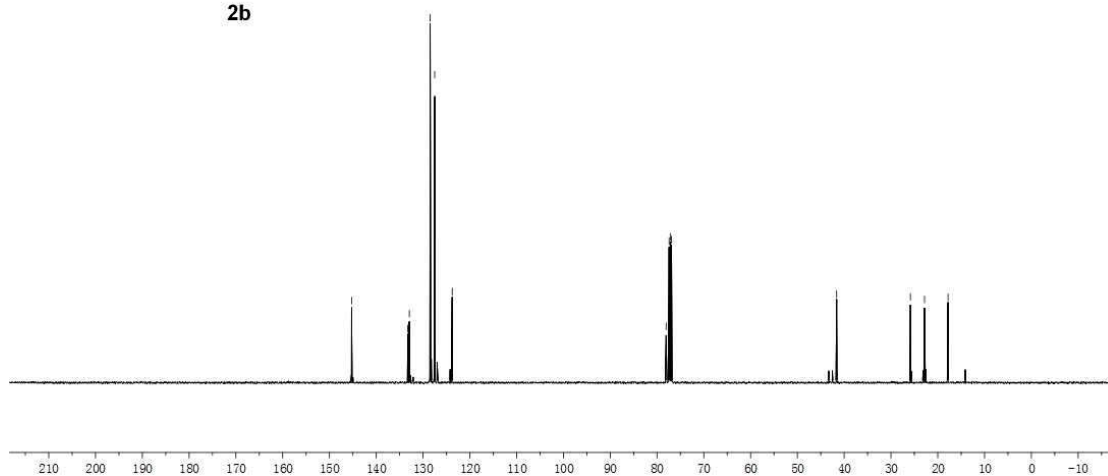

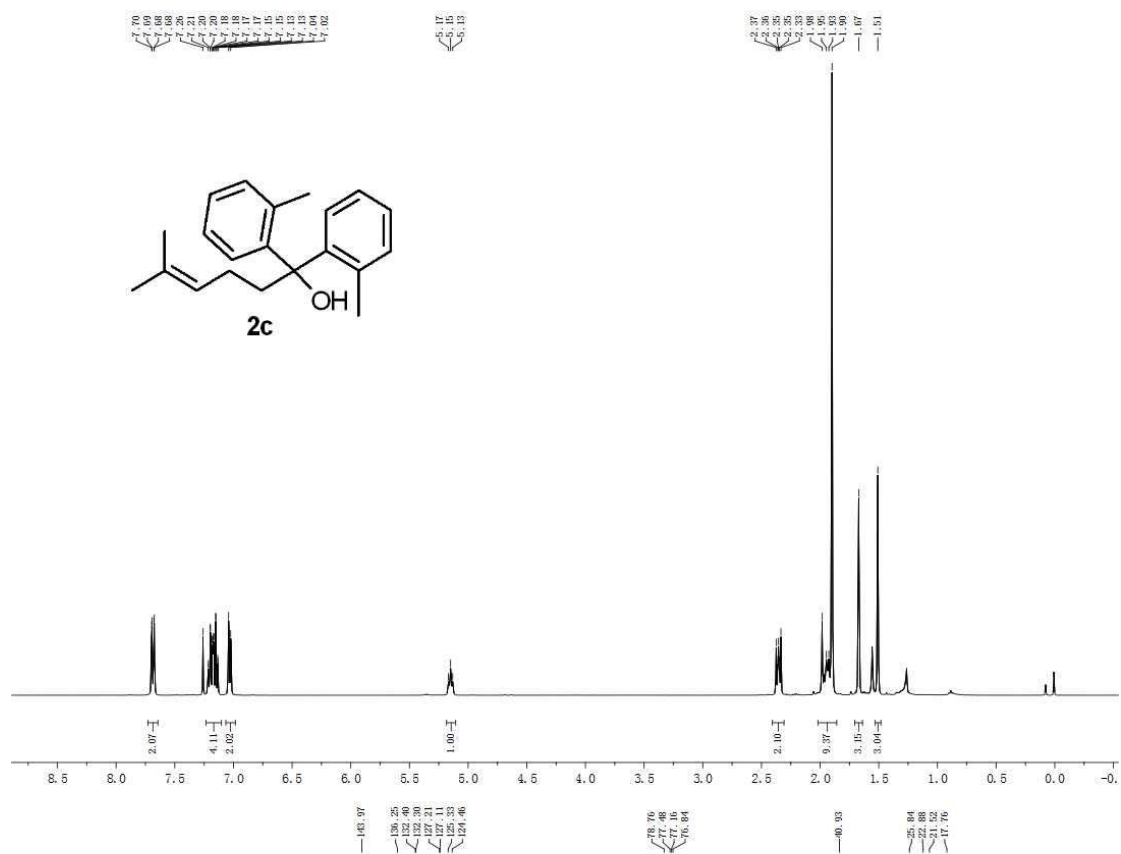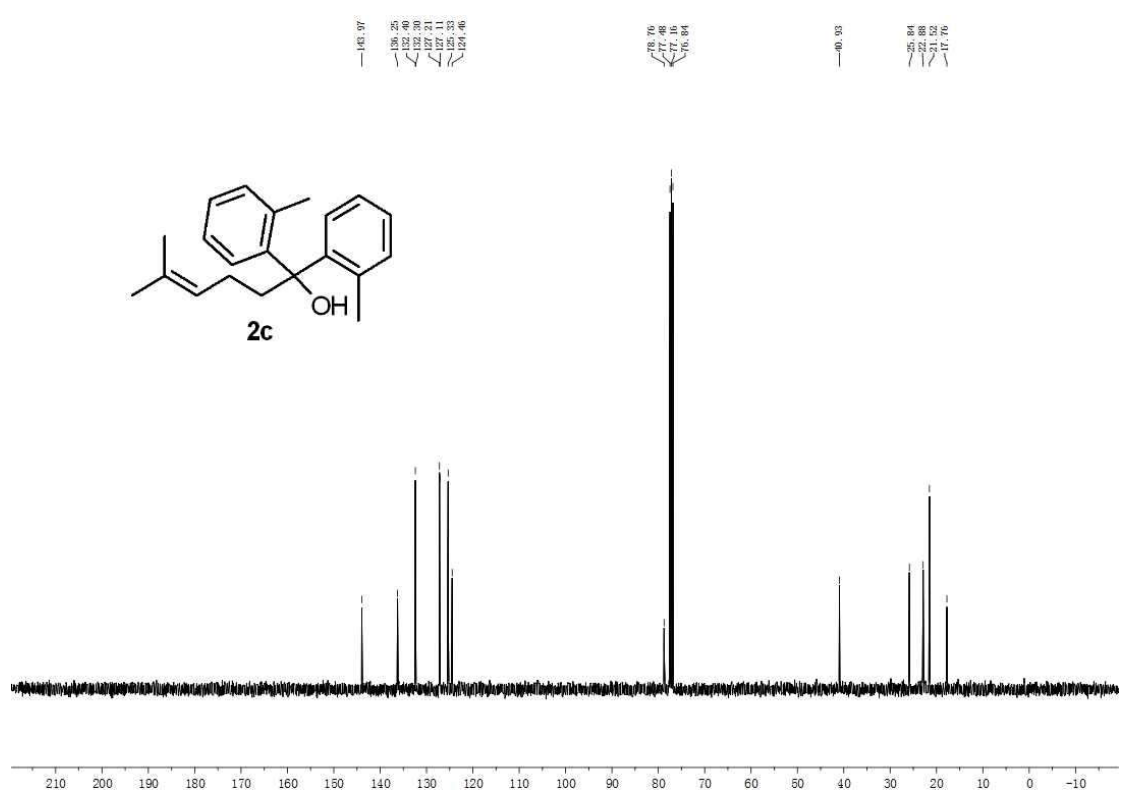

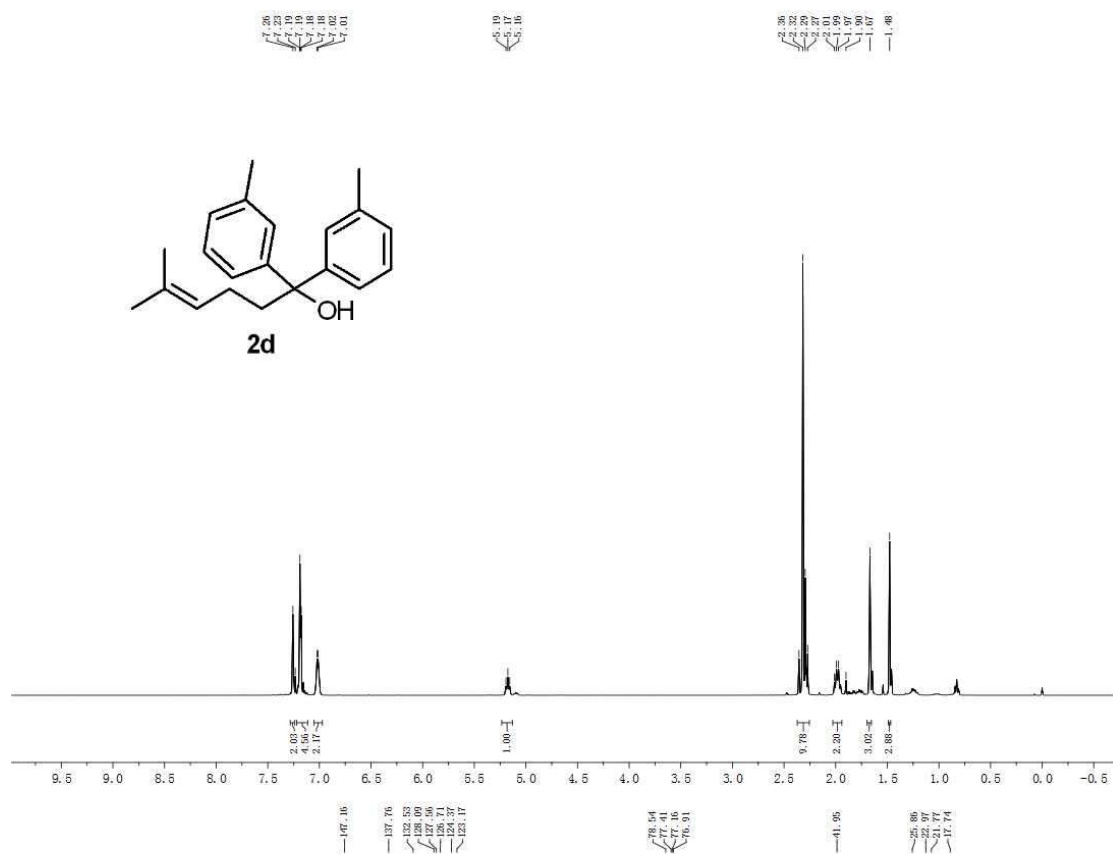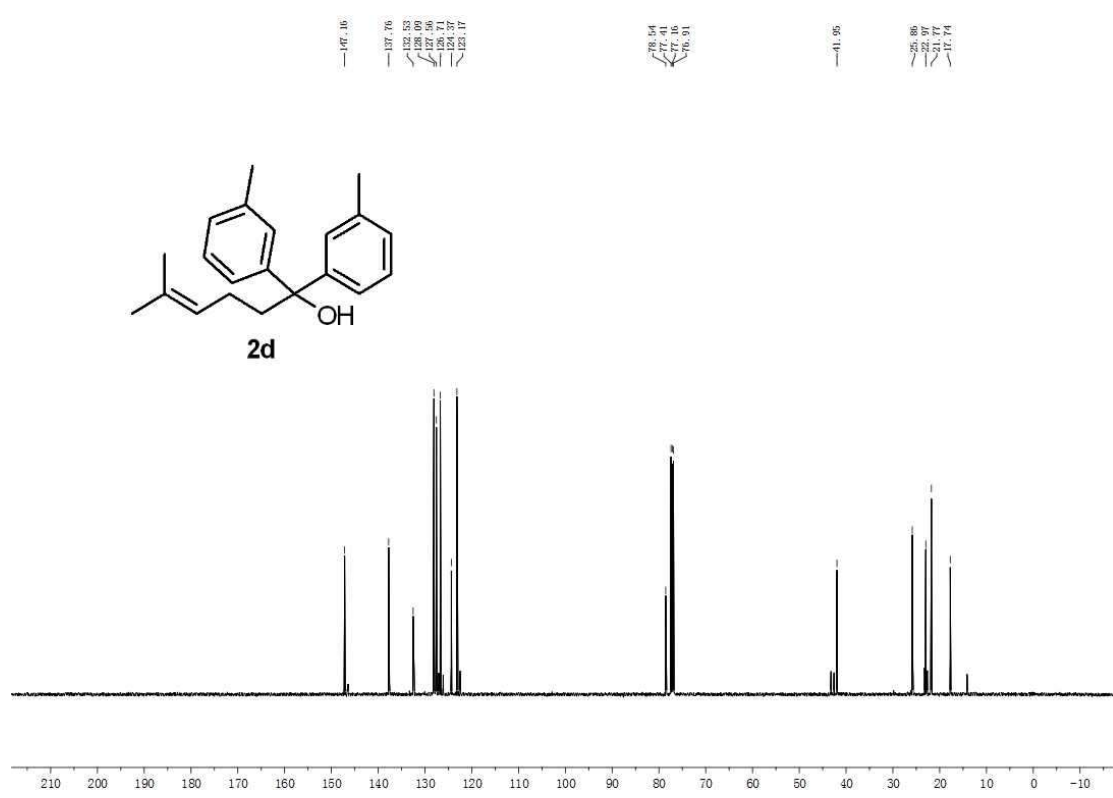



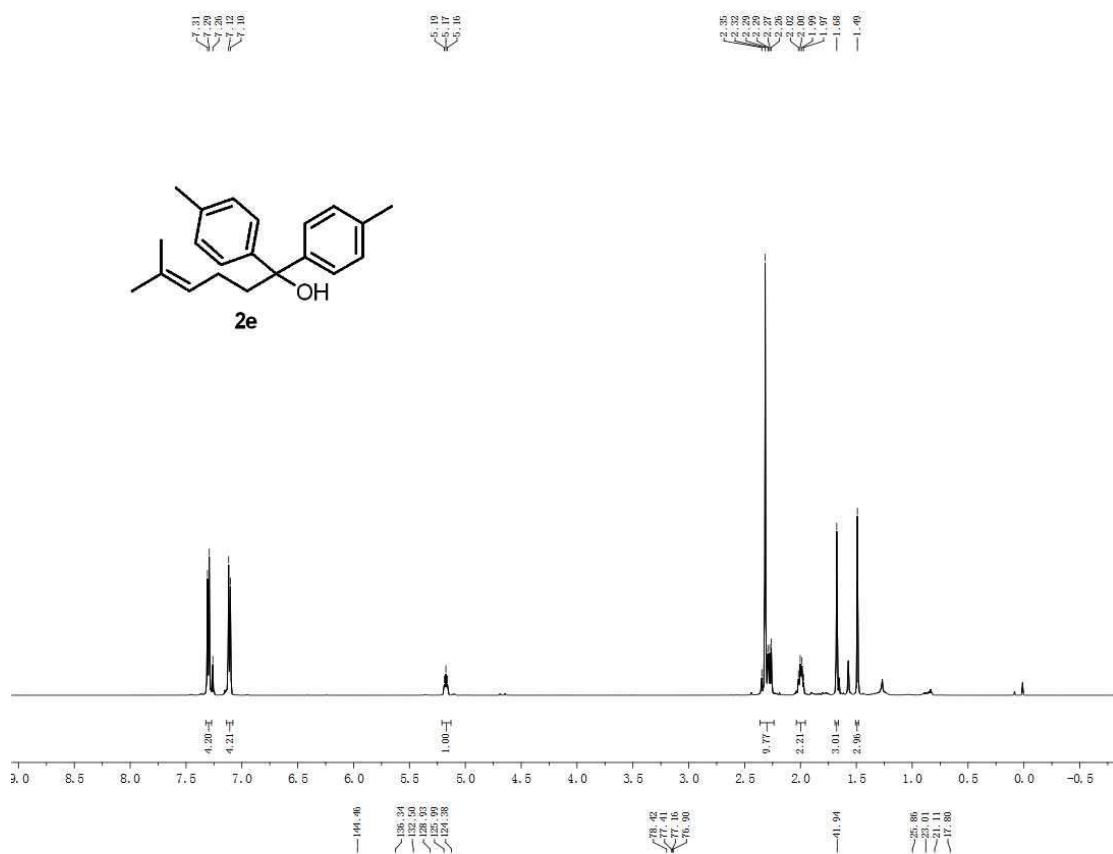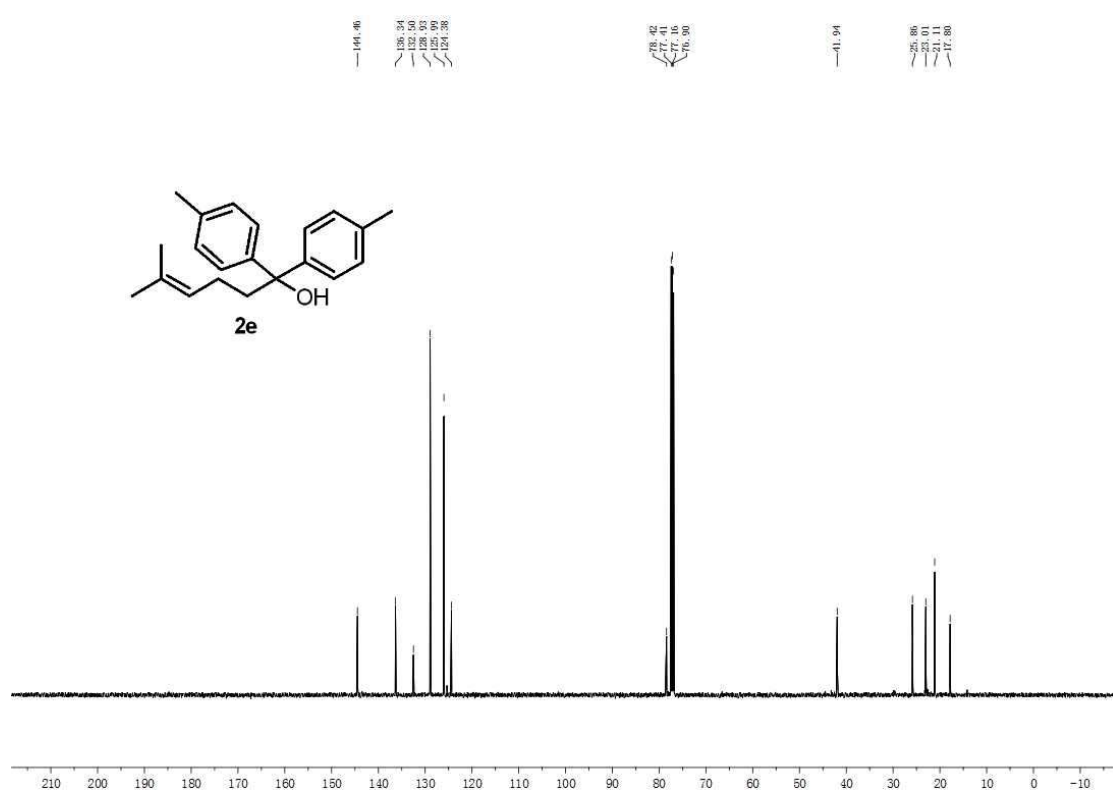

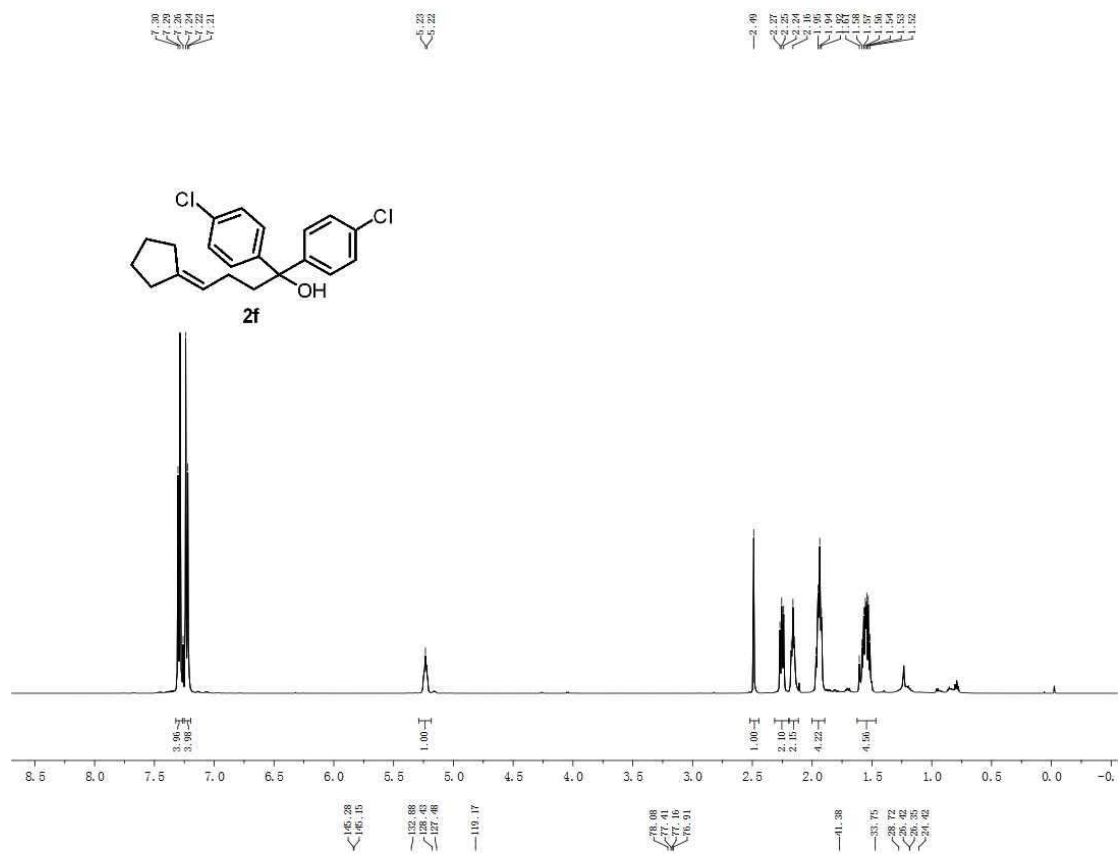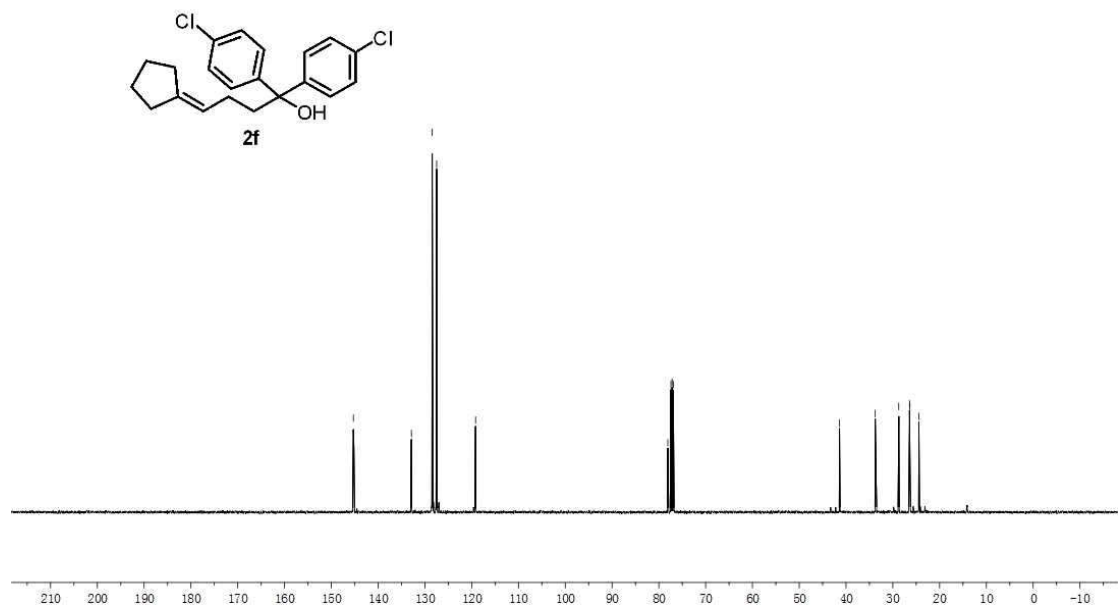

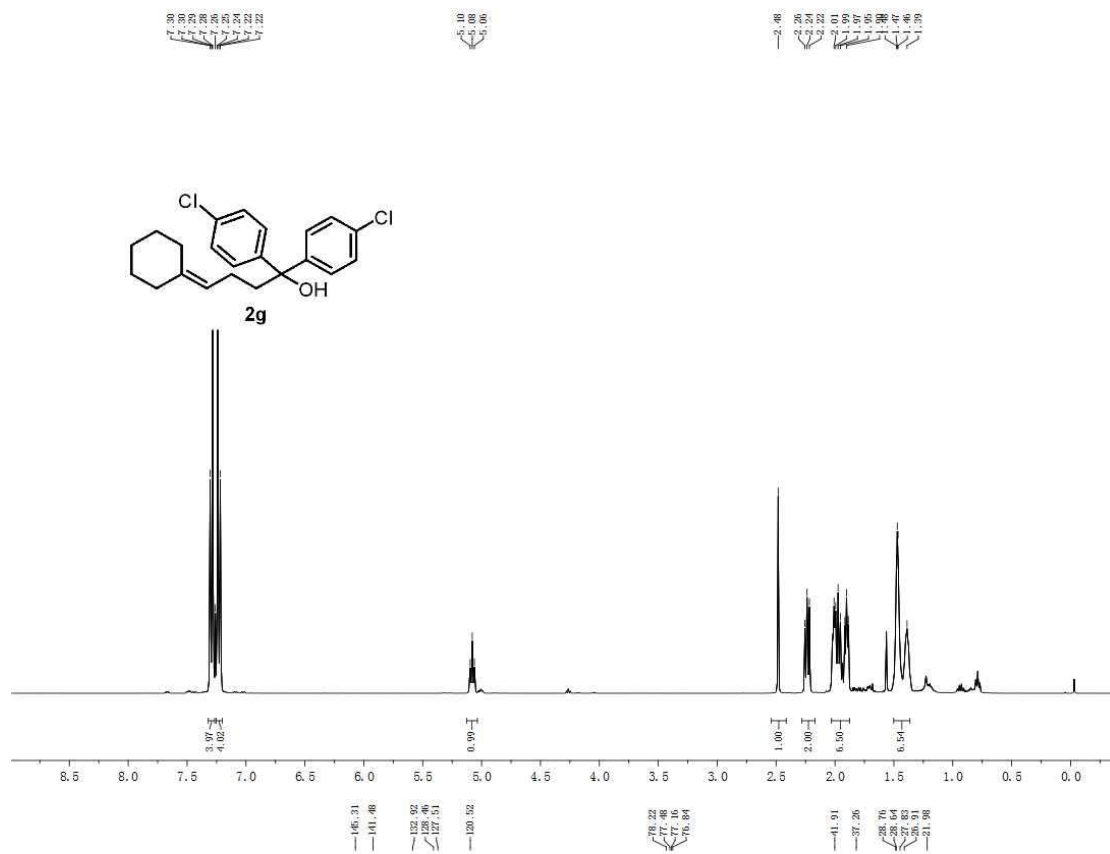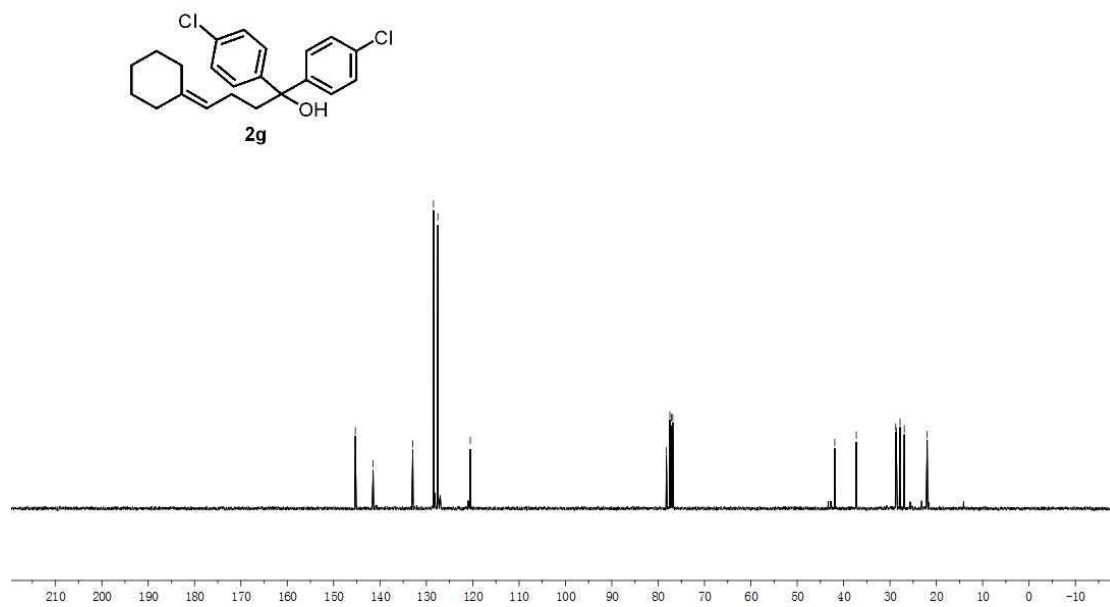

7.31  
7.29  
7.24  
7.22

5.14  
5.10

2.40  
2.26  
2.24  
2.24  
2.23  
2.23  
2.12  
2.12  
2.12  
2.12  
2.01  
1.95  
1.93  
1.90  
1.48  
1.45

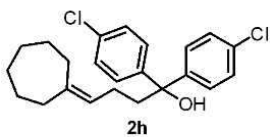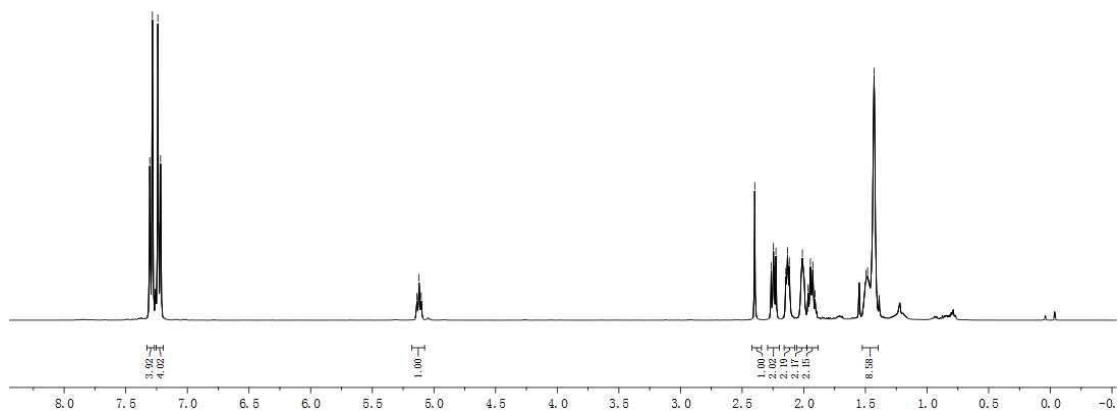

145.31  
143.12

132.95  
128.48  
127.22  
123.96

78.13  
77.46  
76.84

41.65  
37.95  
30.12  
29.97  
29.20  
27.10  
22.43

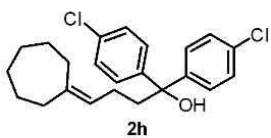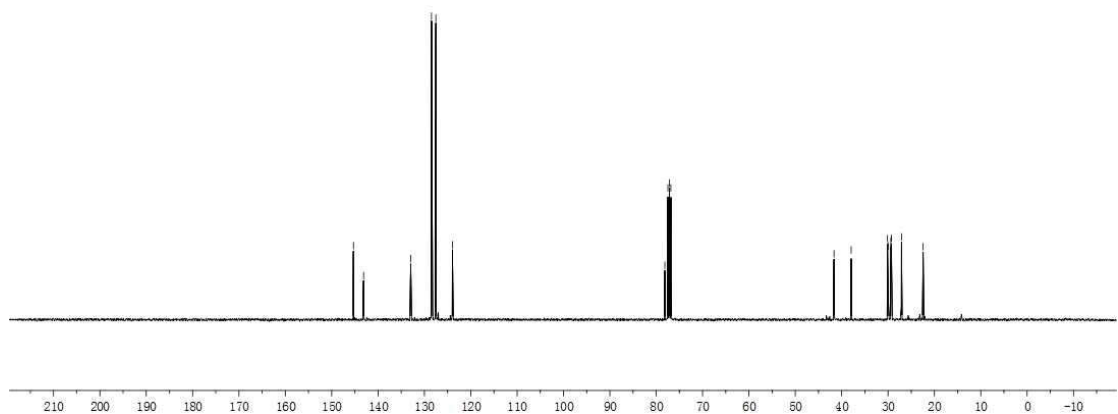

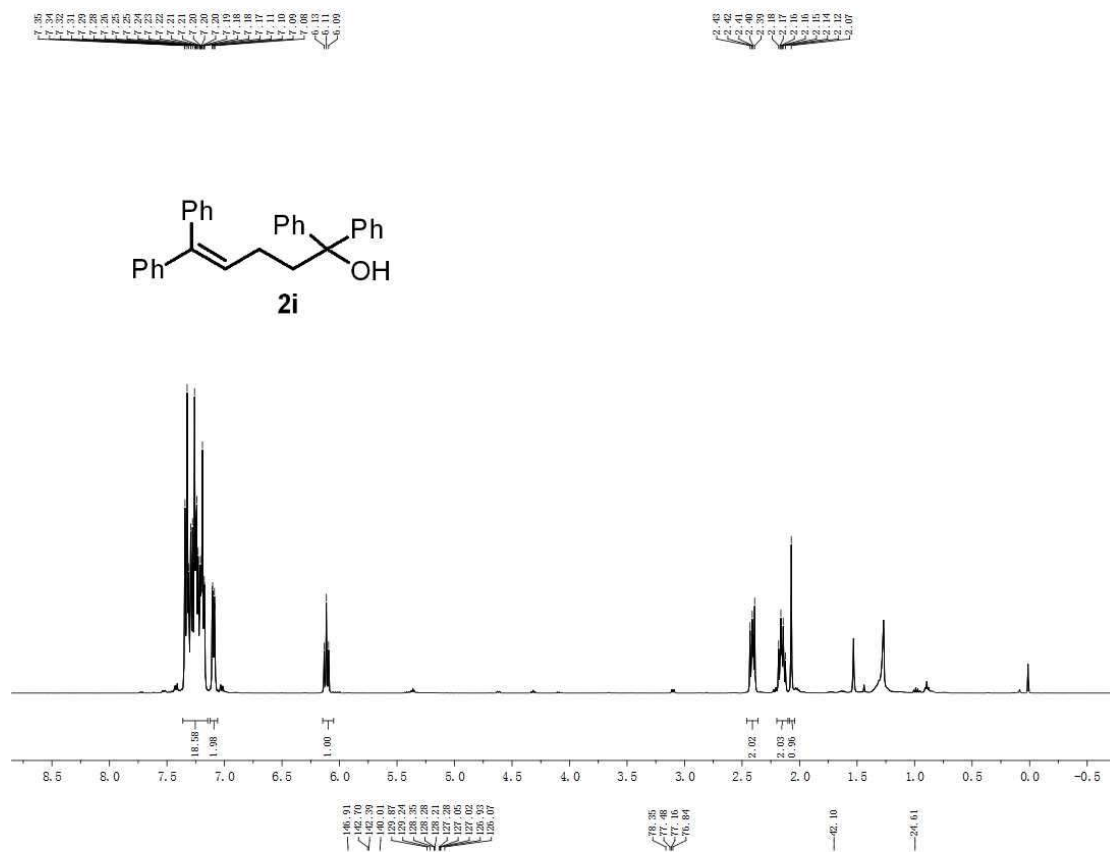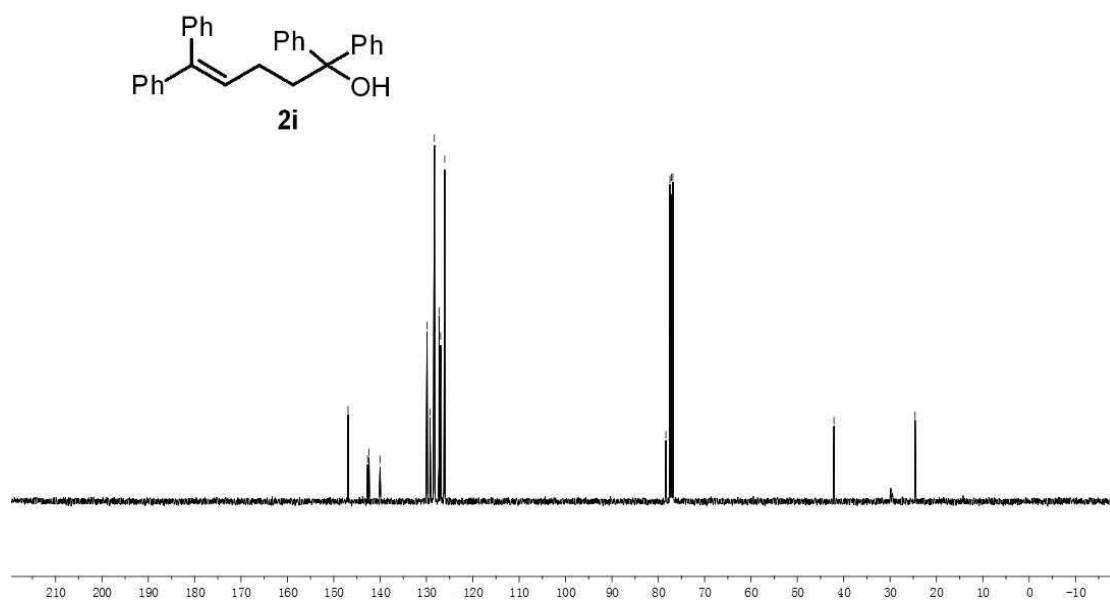

7.32  
7.31  
7.28  
7.27  
7.25  
7.22  
7.21  
7.20  
7.07  
7.05  
7.03  
6.89  
6.80

2.98  
2.98  
2.95  
2.95  
2.14  
2.12  
2.11  
2.09  
2.06

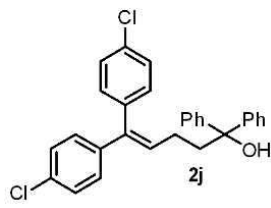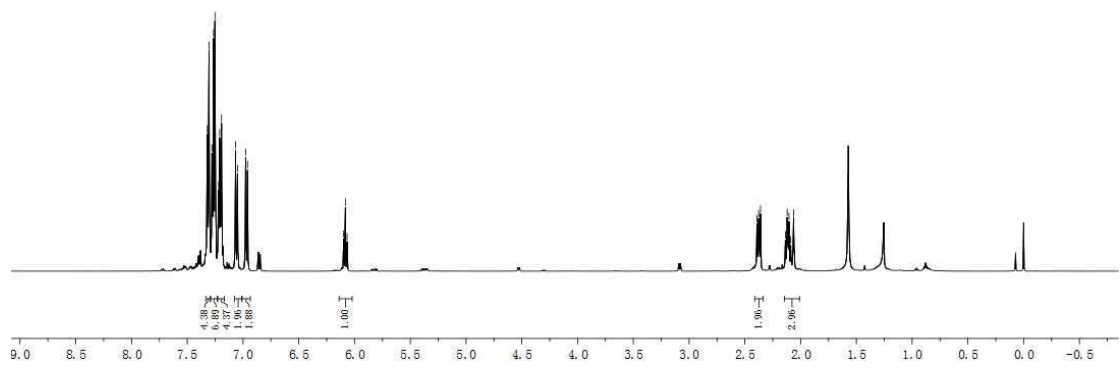

166.71  
160.73  
149.00  
143.36  
133.06  
133.45  
128.70  
128.49  
128.34  
127.07  
126.03

78.20  
77.41  
76.91

41.87

24.61

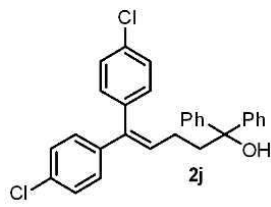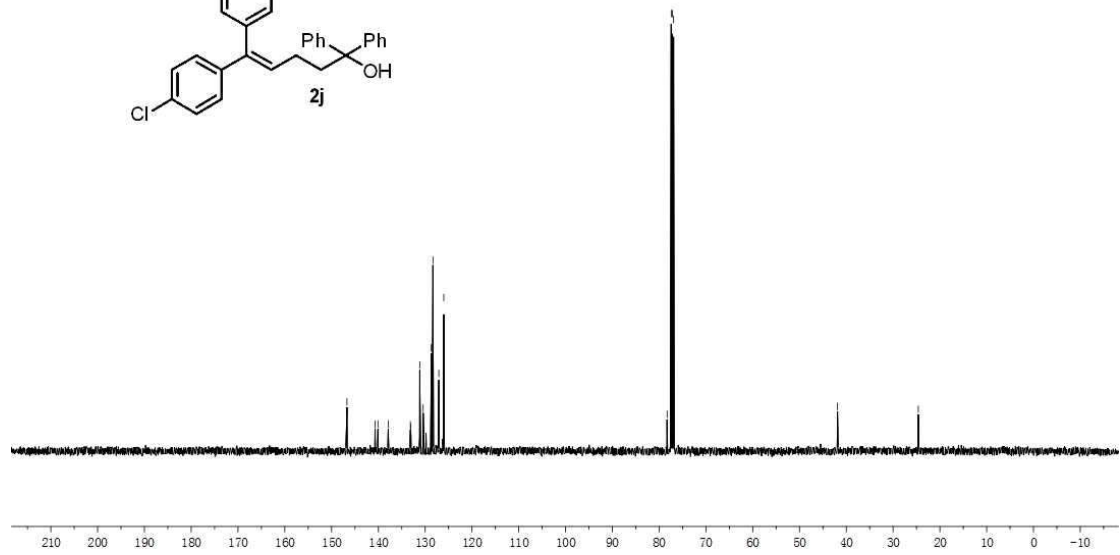

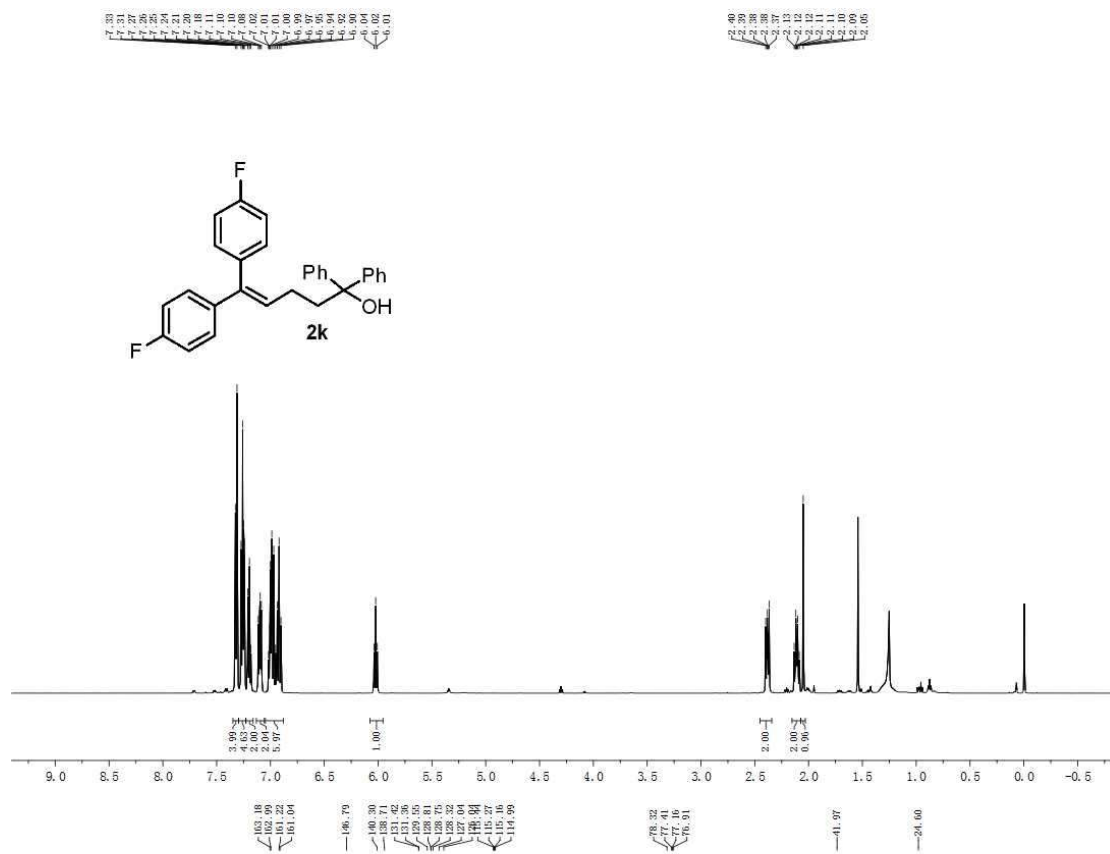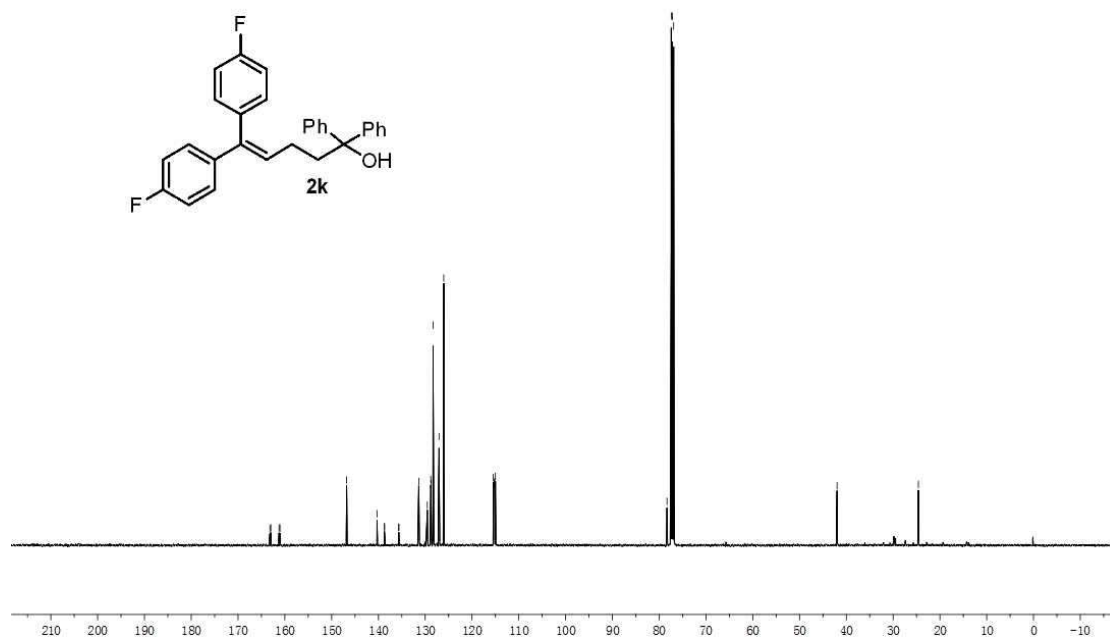

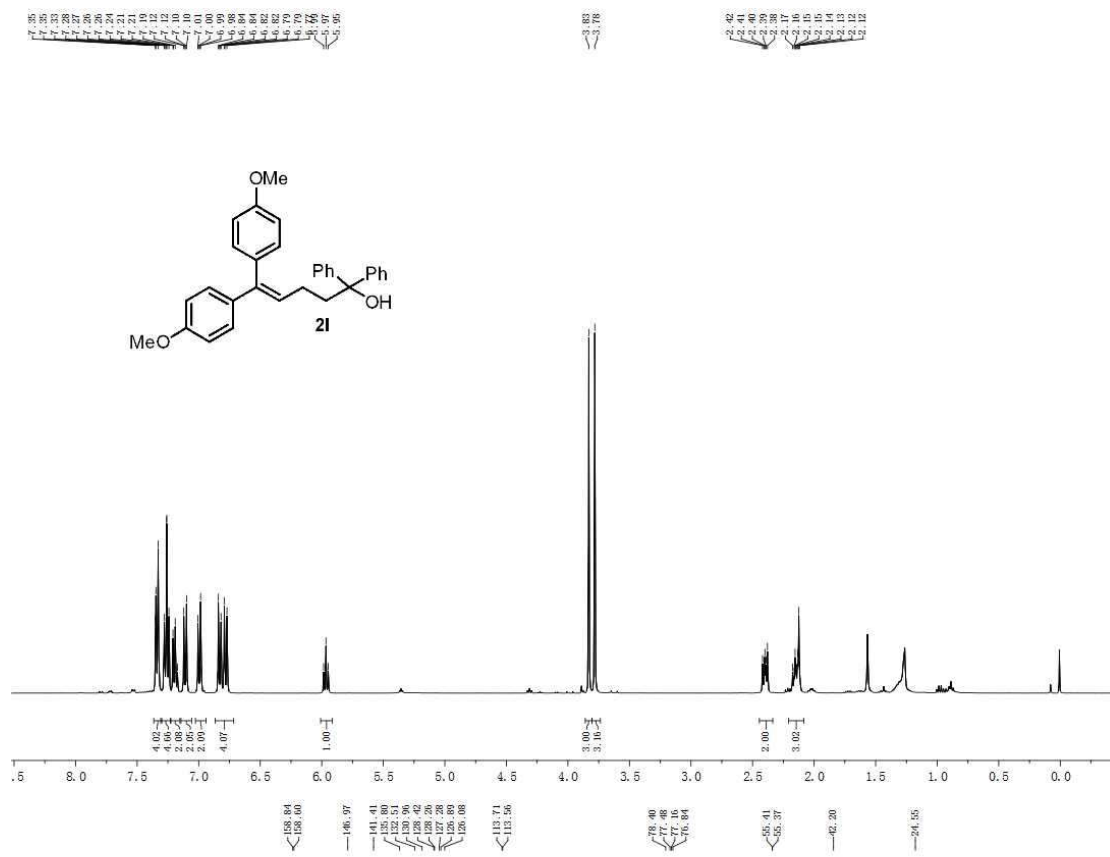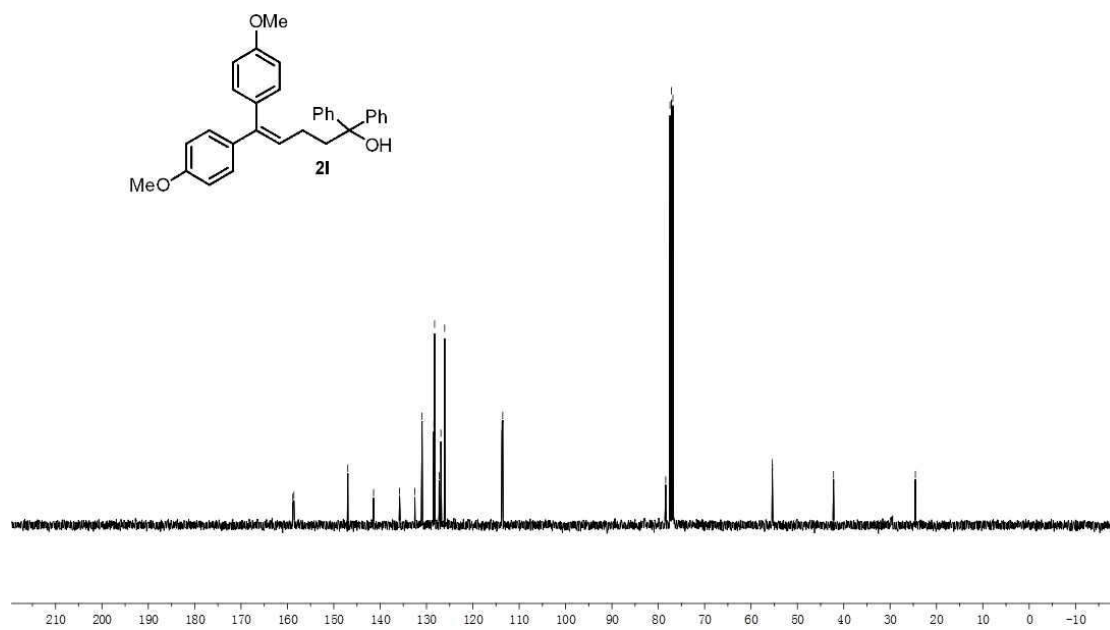



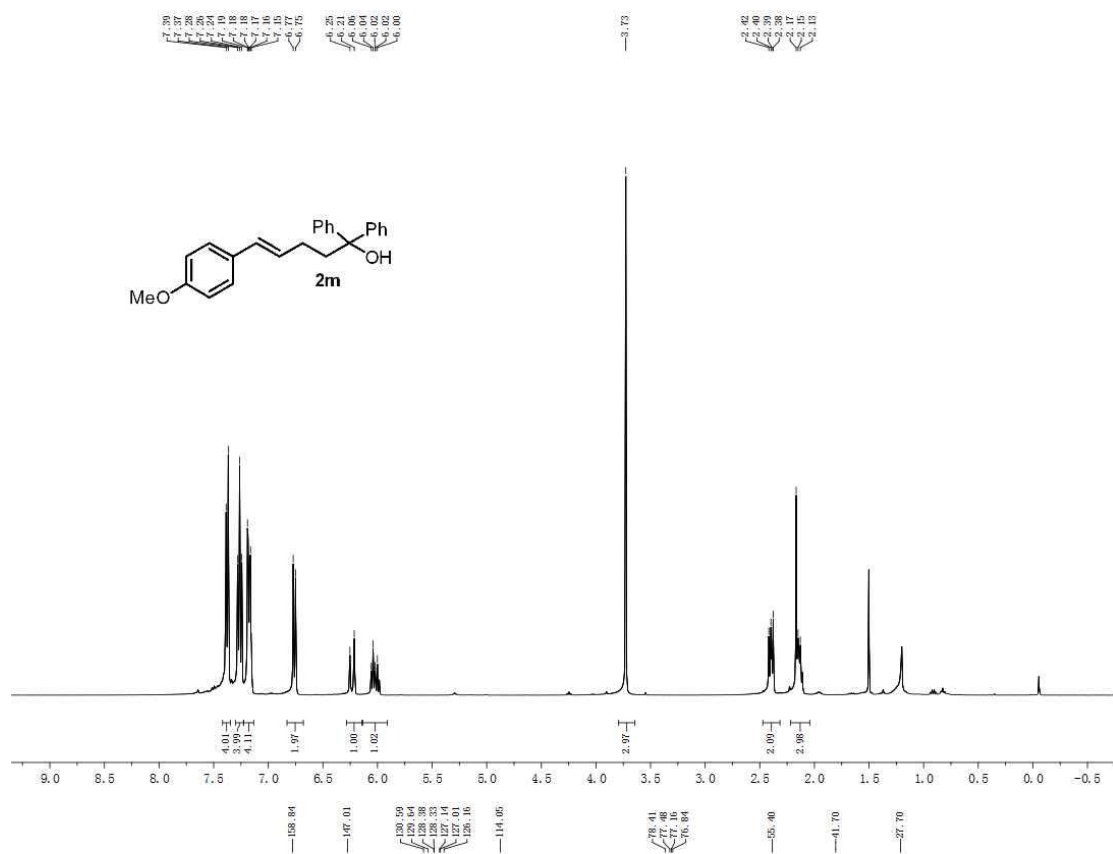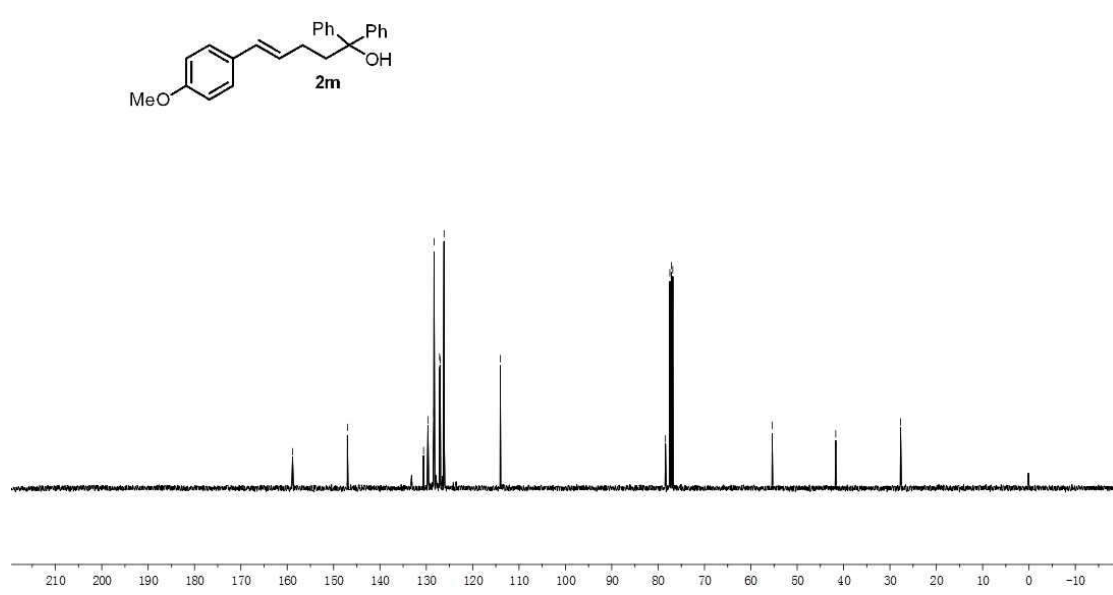

7.43  
7.34  
7.32  
7.29  
7.25  
7.22  
7.08  
7.07  
6.92  
6.91  
6.84  
6.83  
6.40  
6.00  
6.00  
6.00  
6.00

2.46  
2.46  
2.44  
2.43  
2.30  
2.17  
2.16

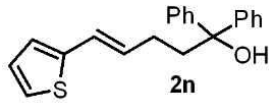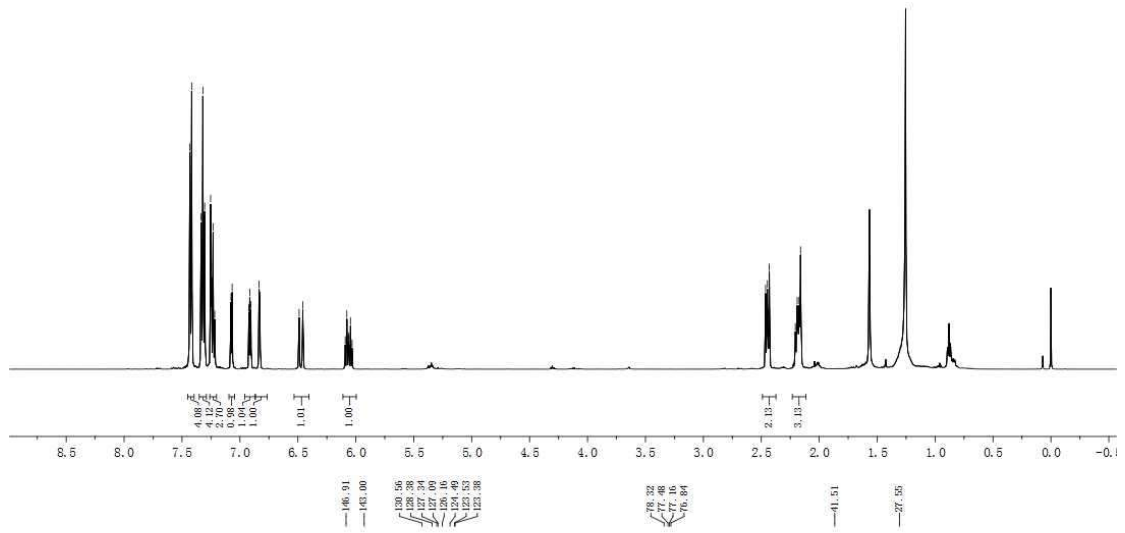

166.91  
143.00  
130.56  
128.38  
127.00  
126.16  
125.53  
123.38  
78.32  
77.86  
76.84  
41.51  
27.56

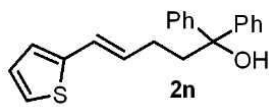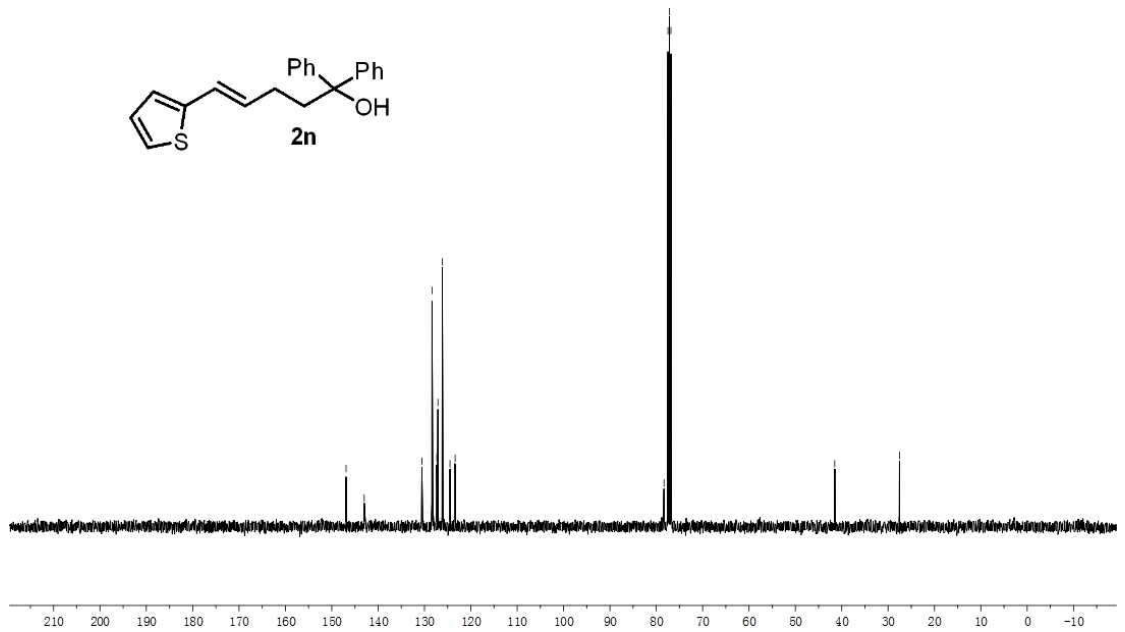

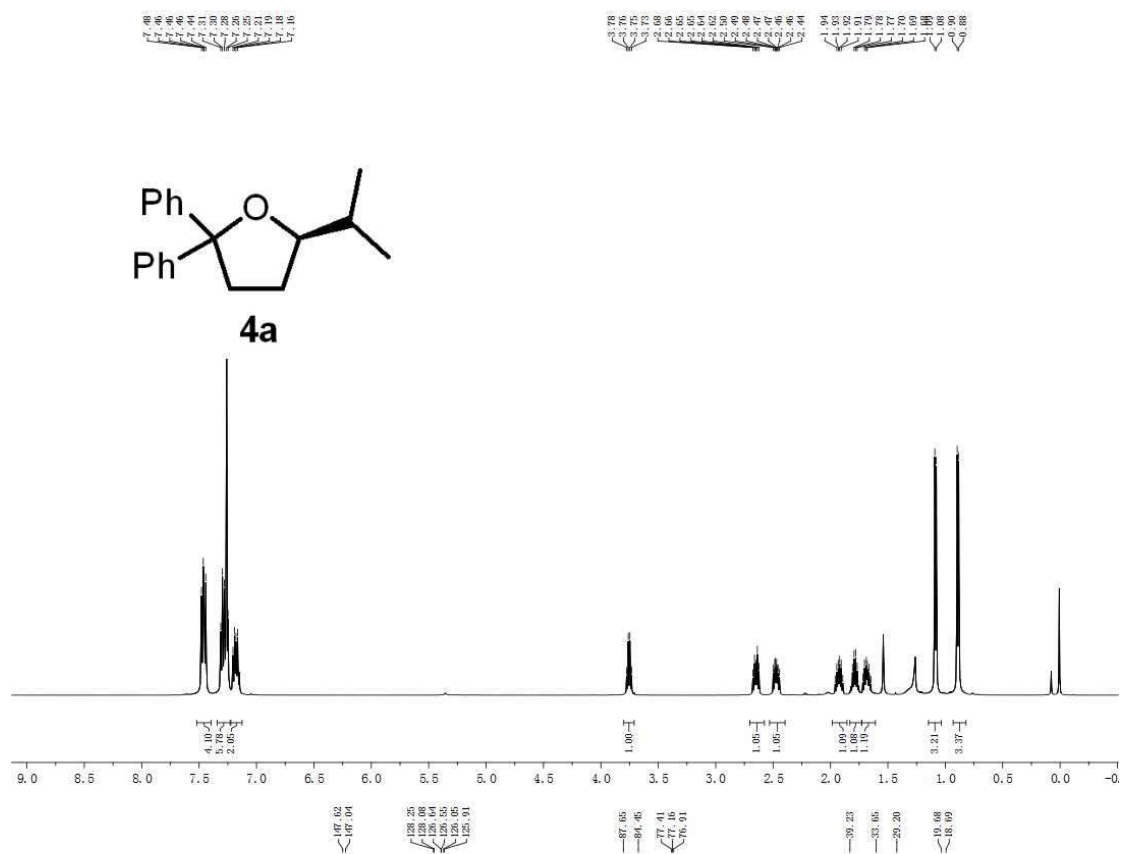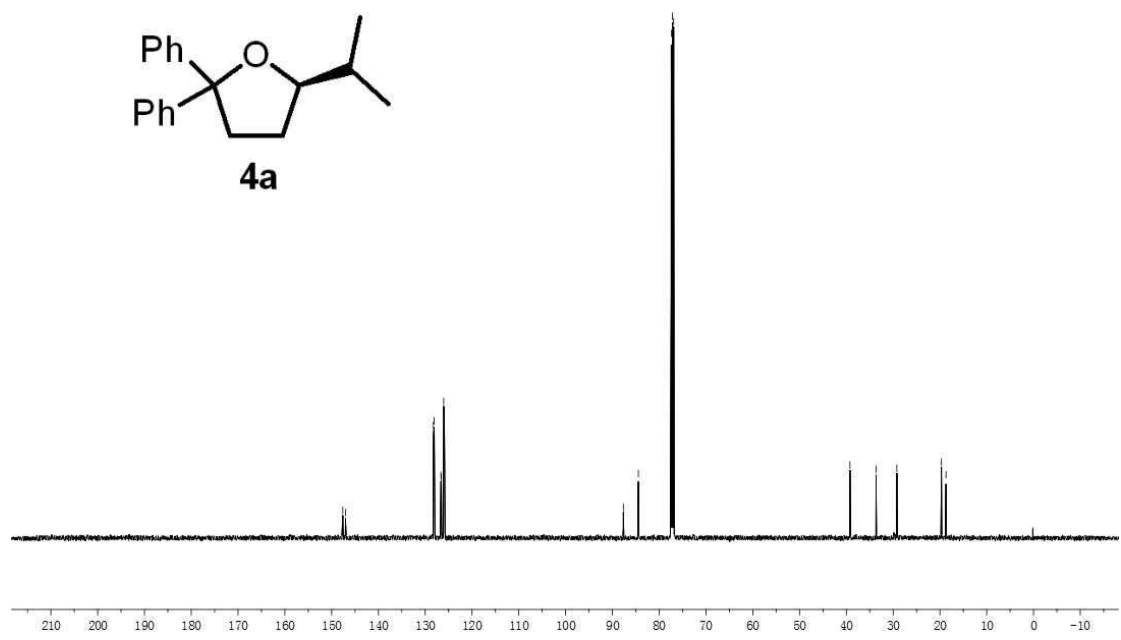

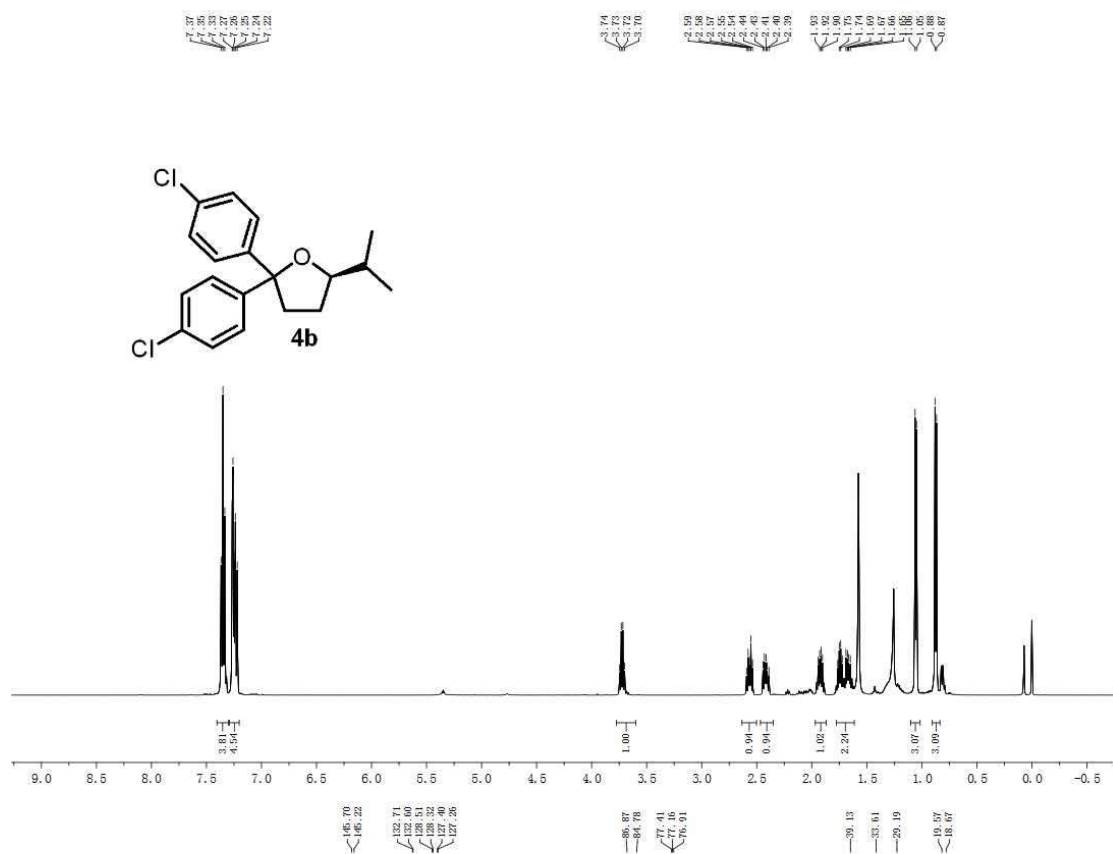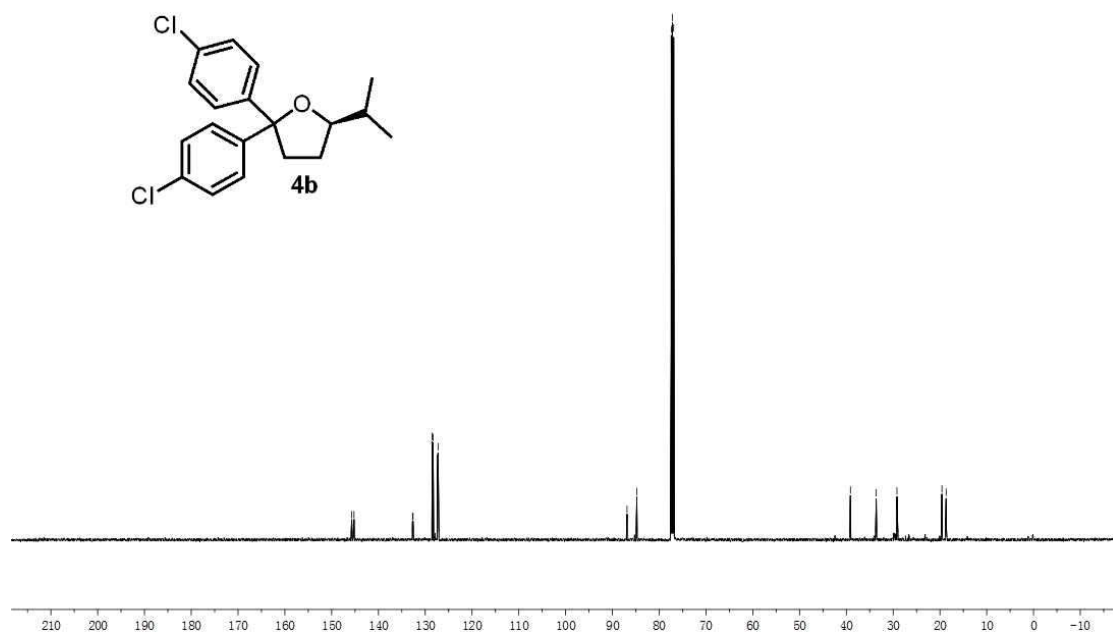

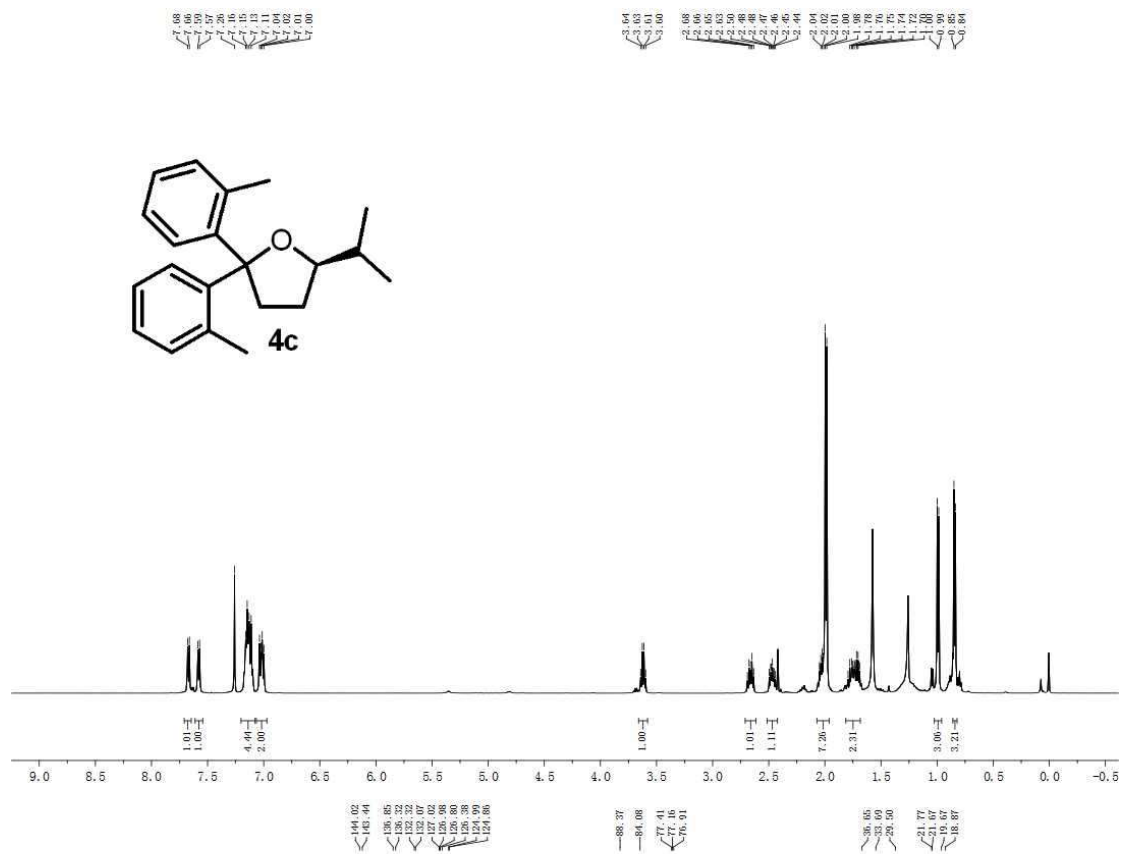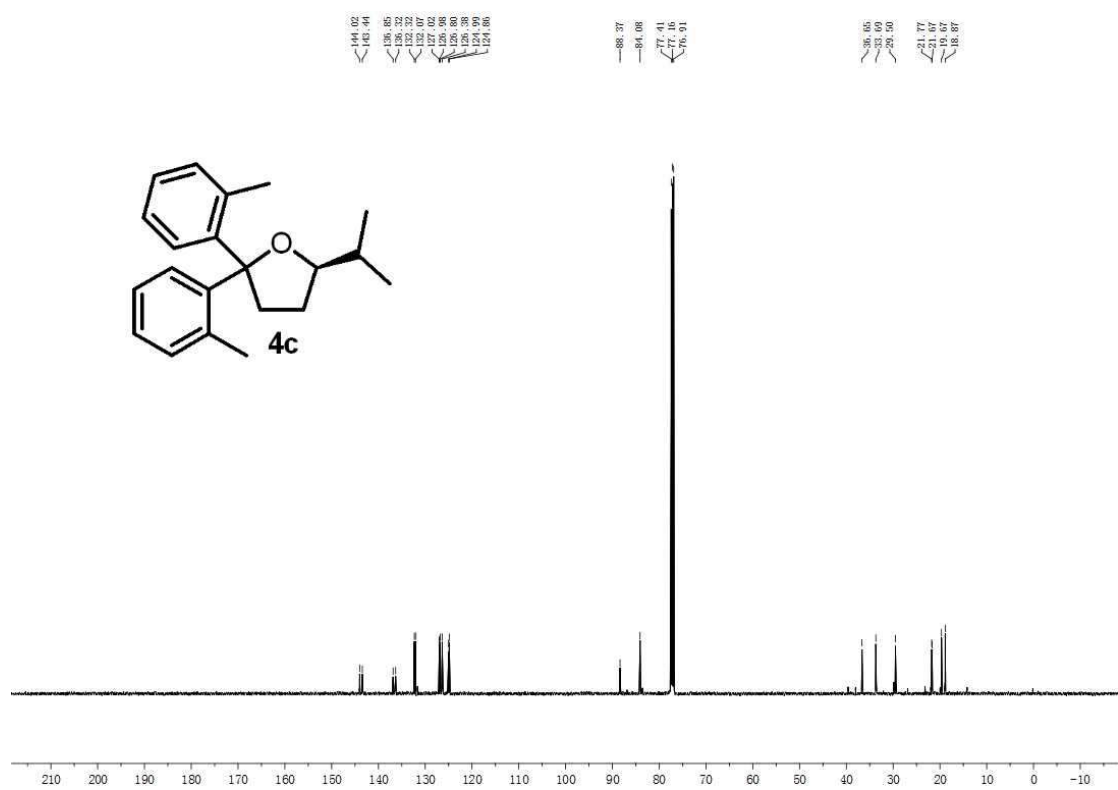

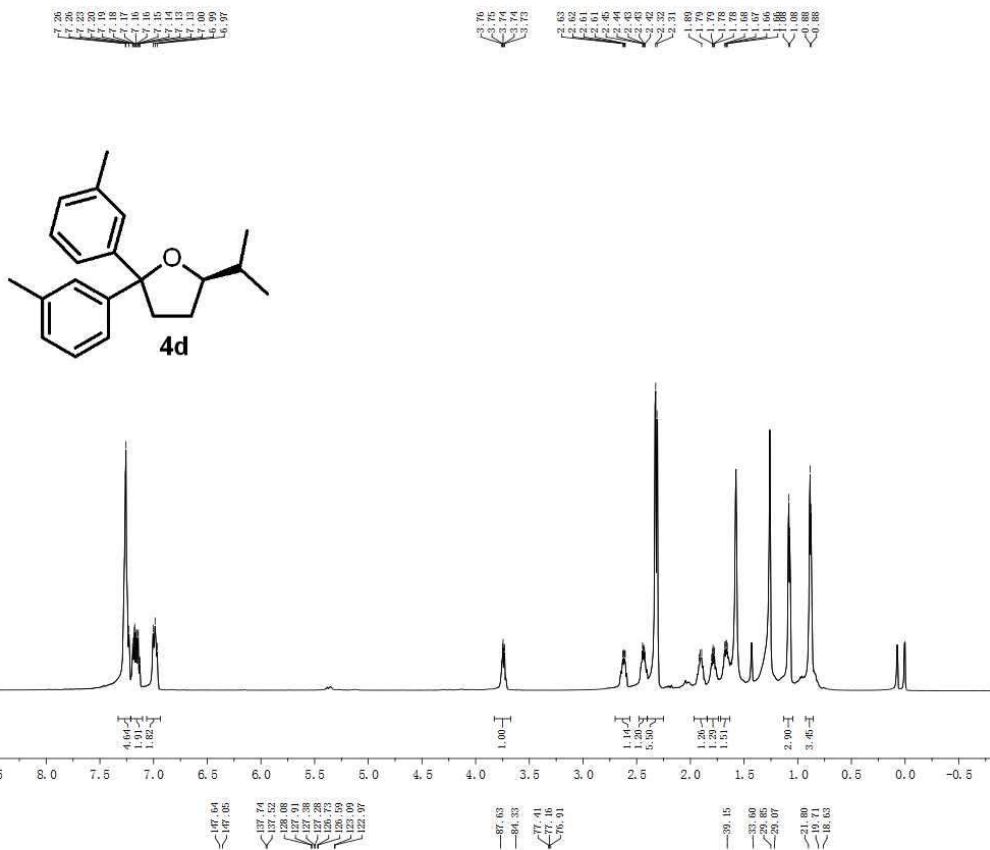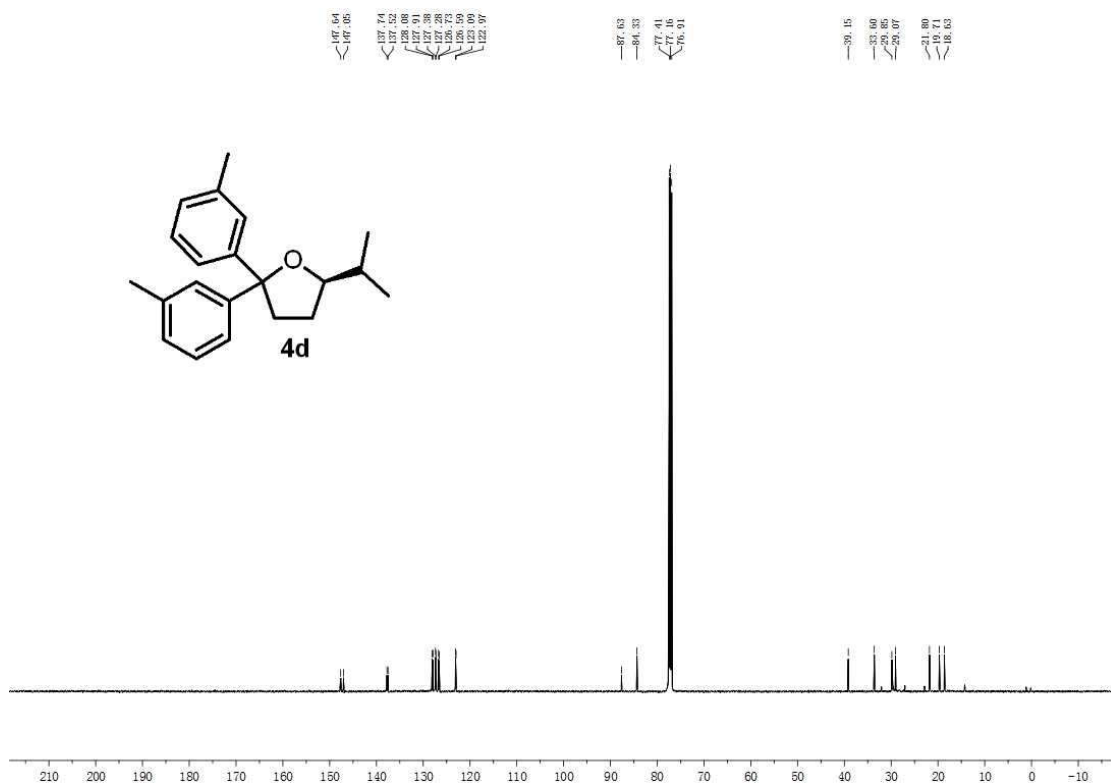

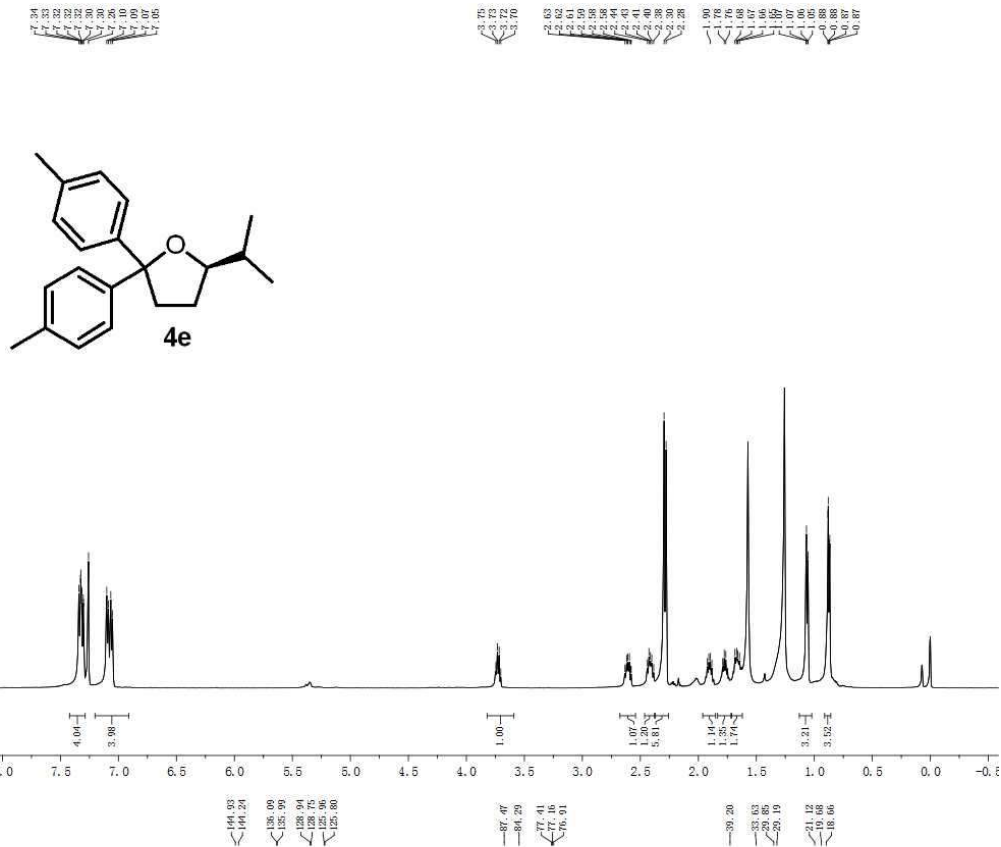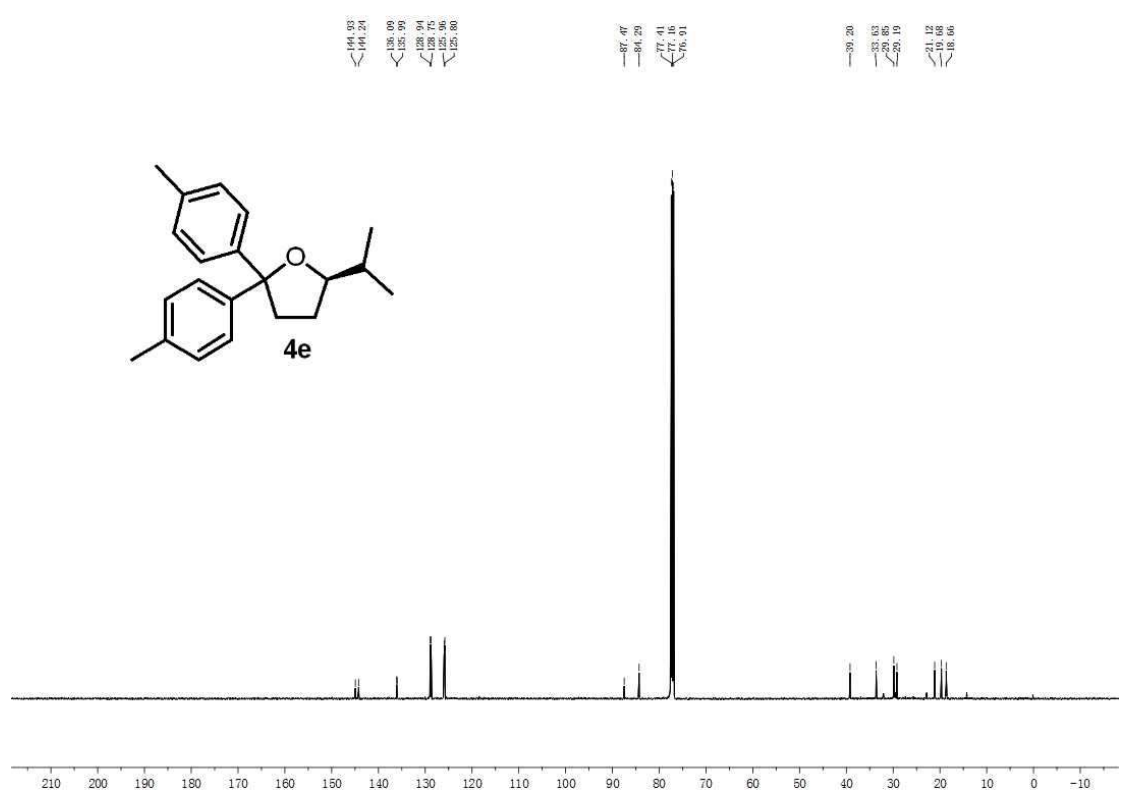

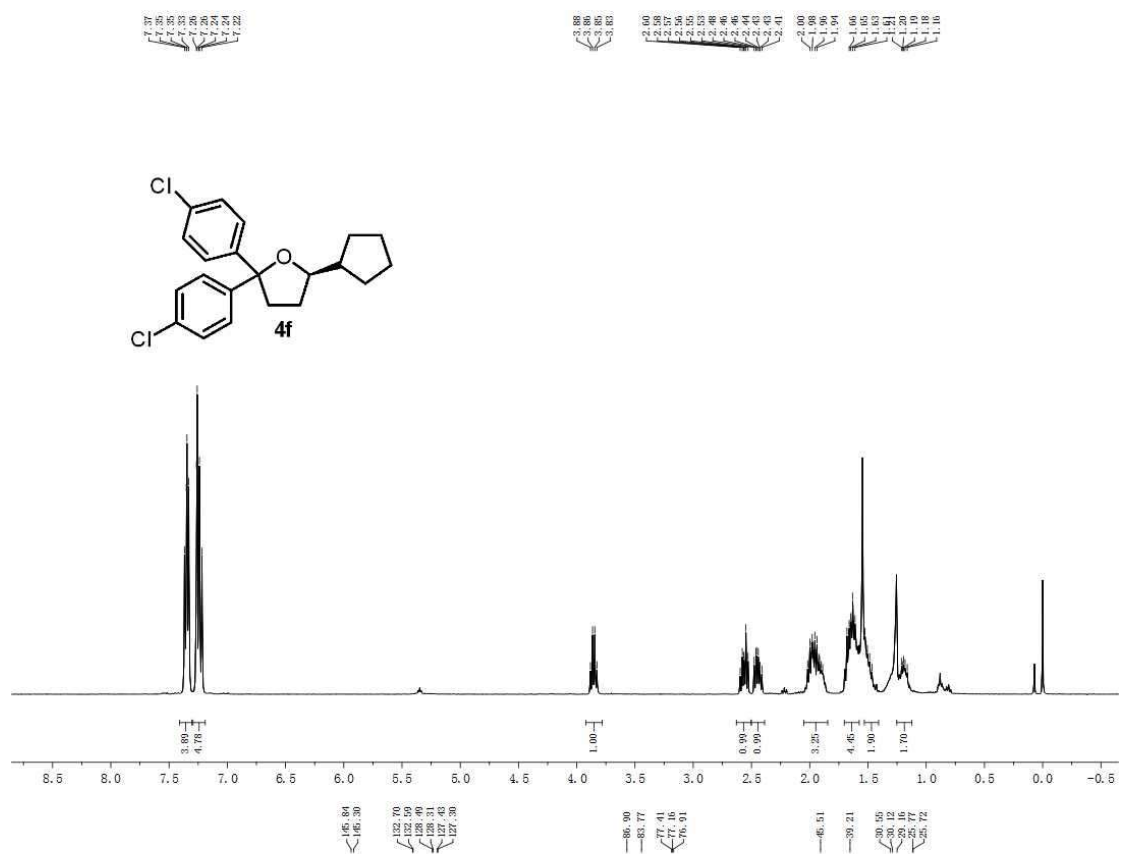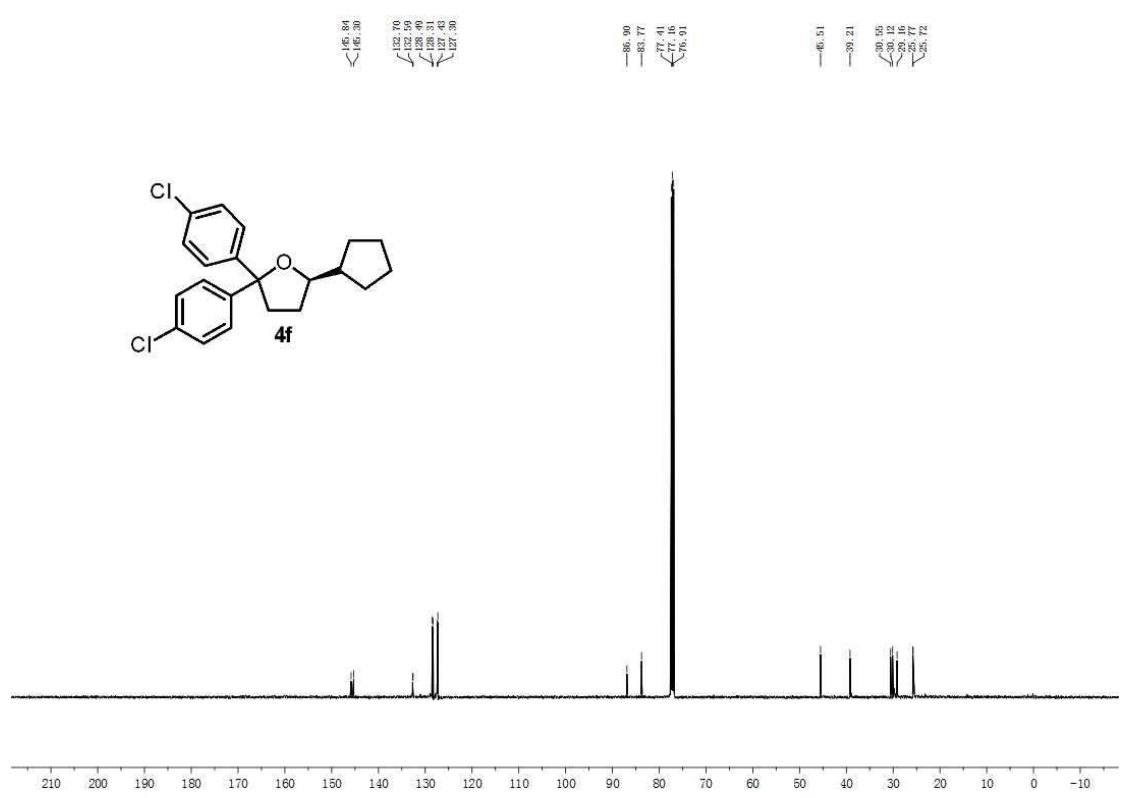



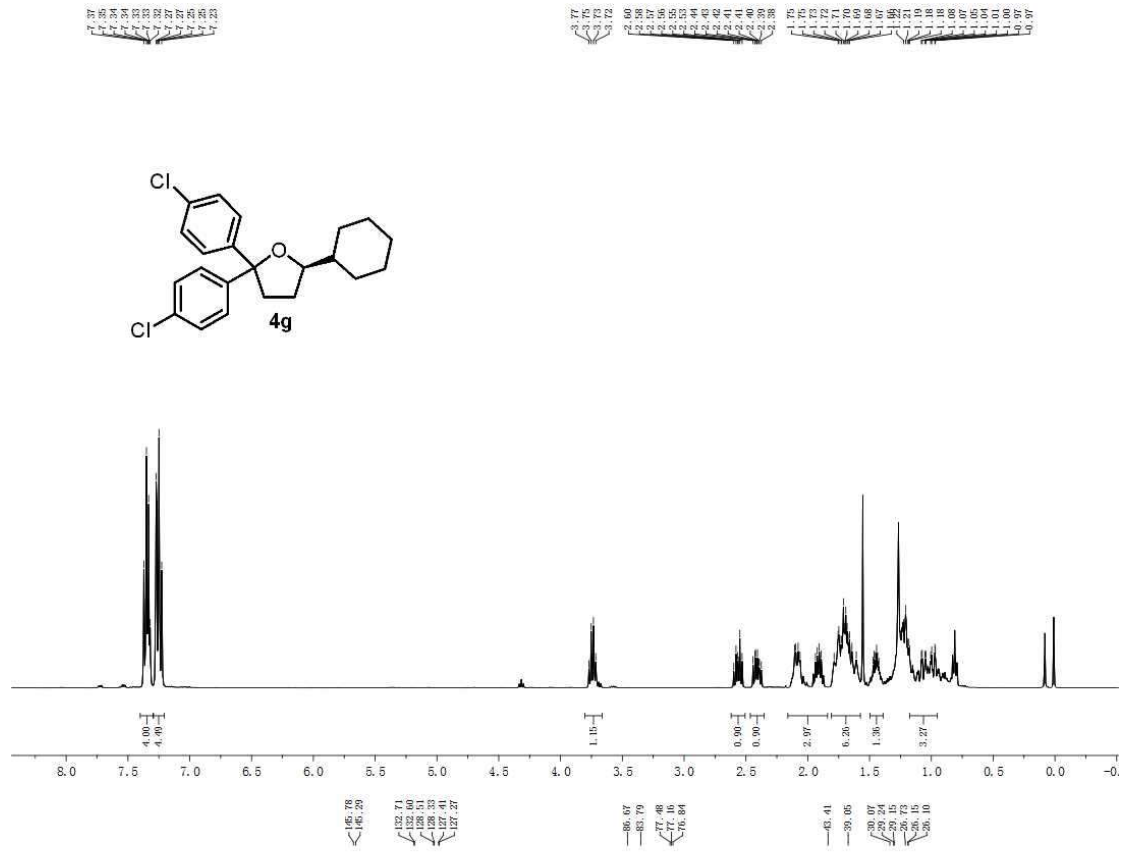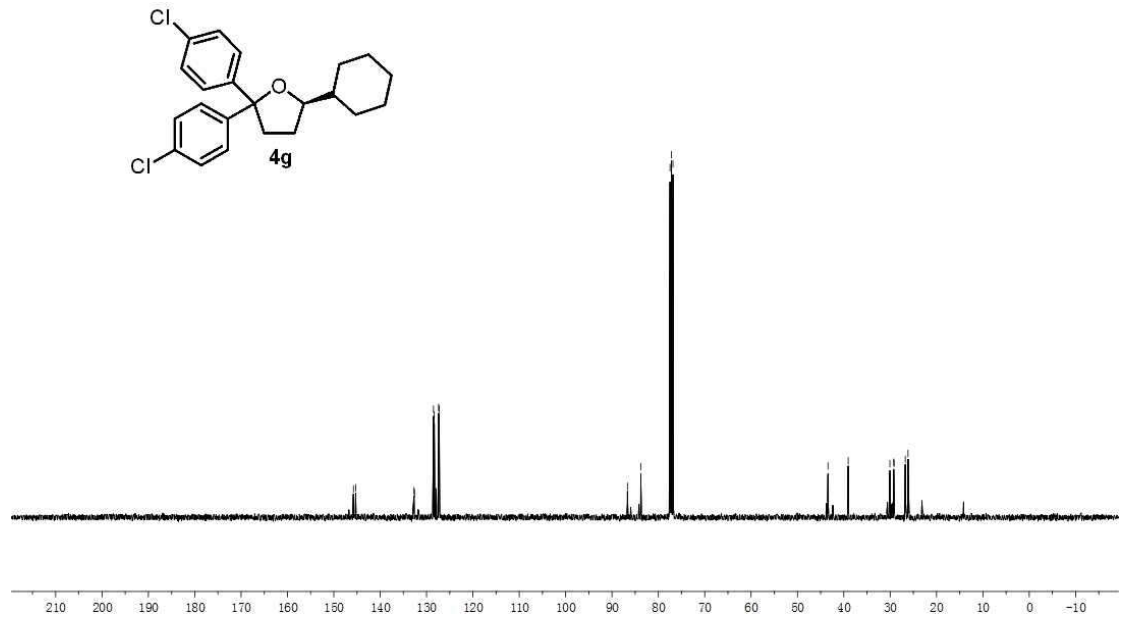

7.36  
7.34  
7.32  
7.29  
7.27

3.82  
3.79

2.59  
2.58  
2.55  
2.55  
2.44  
2.43  
2.42  
2.40  
2.39

2.01  
1.93  
1.73  
1.72  
1.71  
1.70  
1.68  
1.66  
1.65  
1.62  
1.54  
1.52  
1.51  
1.49  
1.45  
1.43  
1.35  
1.19

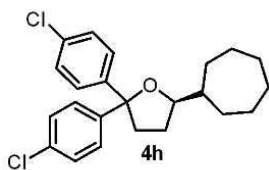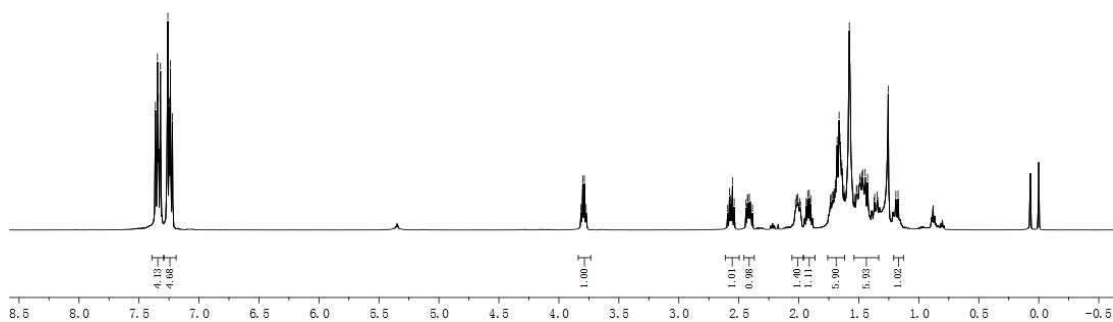

163.75  
163.25  
132.71  
132.52  
128.32  
127.45  
127.26

86.60  
83.73  
77.41  
77.16  
76.91

44.74  
39.21  
30.86  
30.49  
29.39  
28.55  
26.99  
26.89

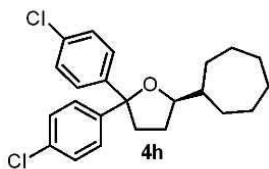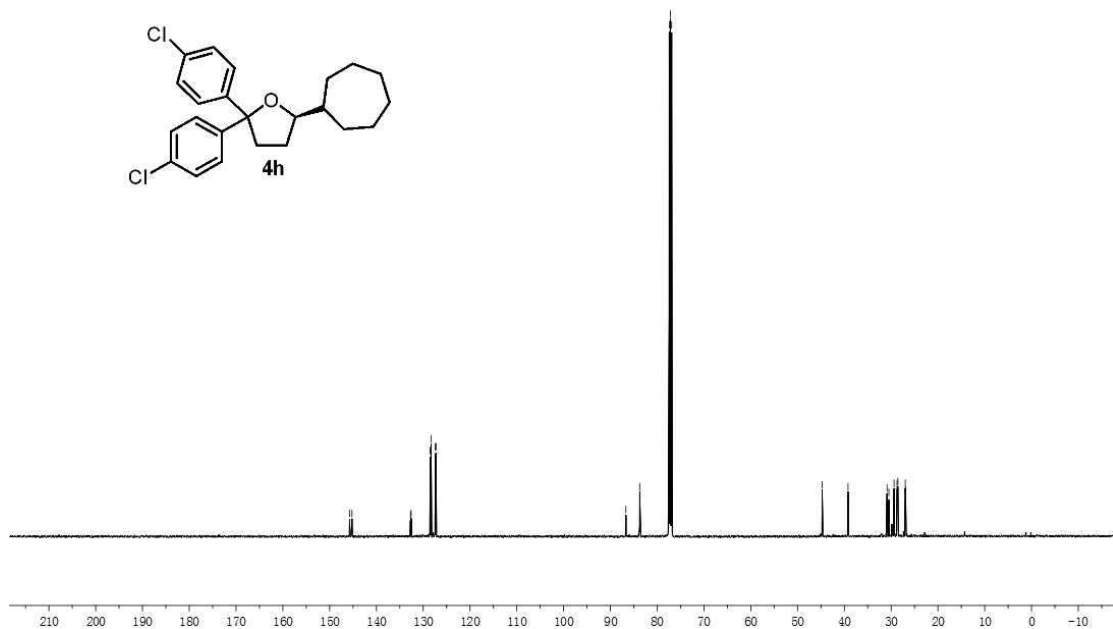

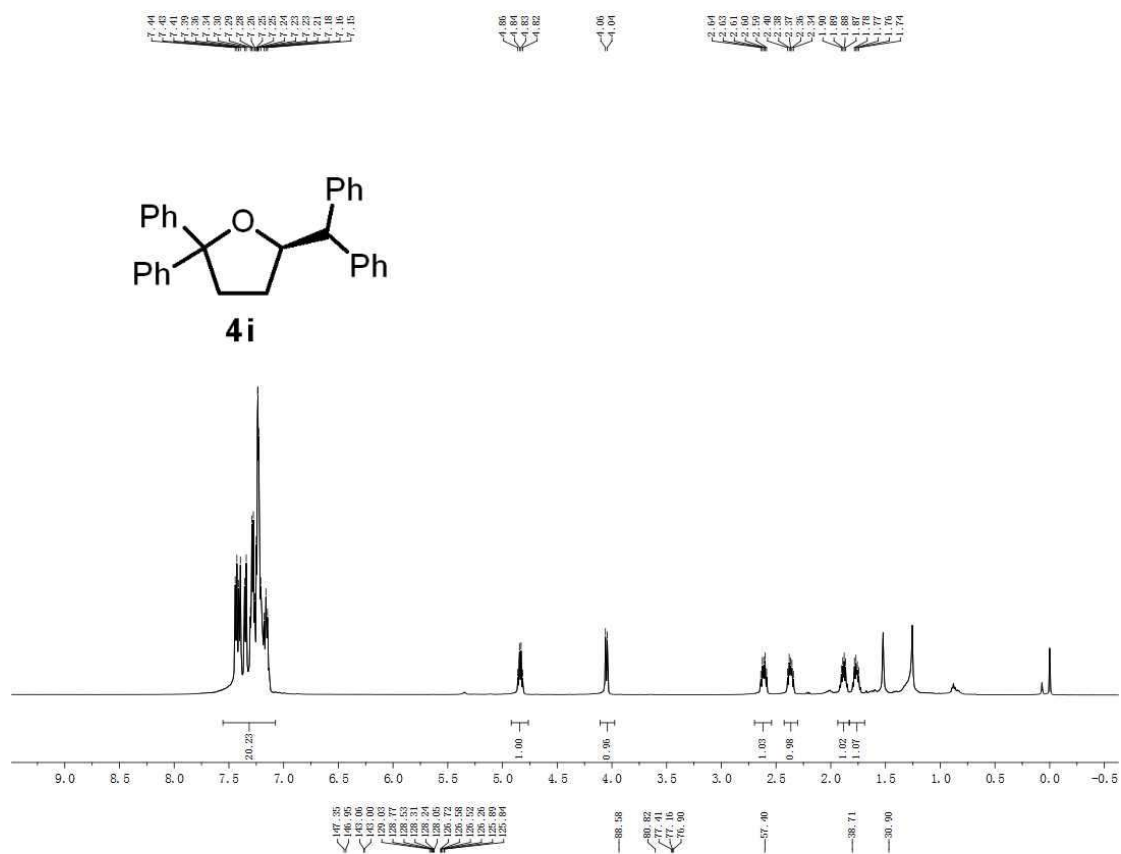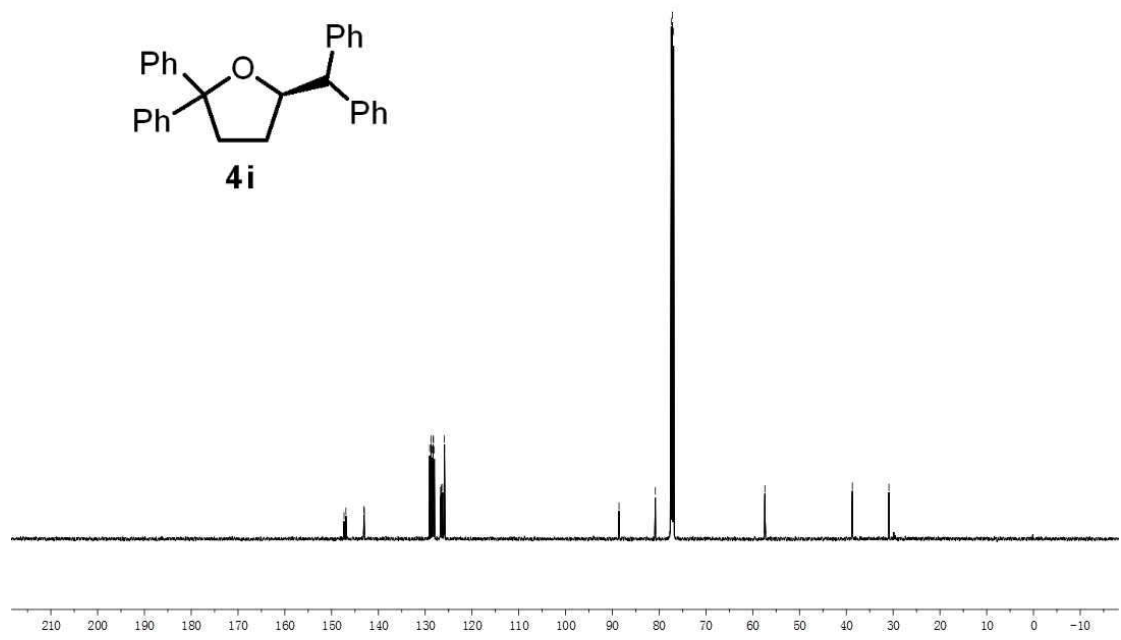

7.39, 7.32, 7.30, 7.29, 7.27, 7.25, 7.24, 7.23, 7.19, 7.18, 7.17, 7.14, 4.77, 4.75, 4.72, 3.99, 3.97, 2.65, 2.62, 2.61, 2.58, 2.56, 2.39, 2.37, 2.35, 2.34, 2.02, 2.00, 1.93, 1.88, 1.85, 1.73, 1.72, 1.70, 1.68

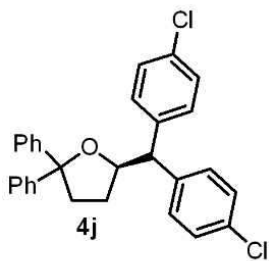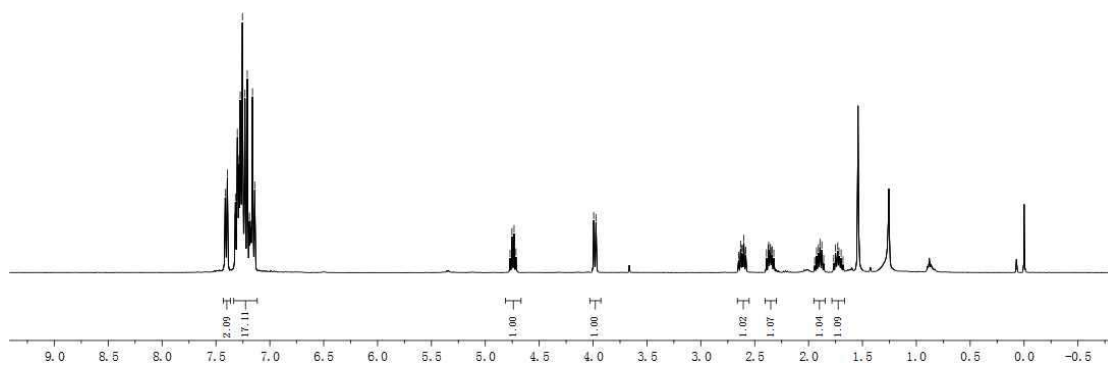

146.99, 146.62, 141.05, 140.86, 132.32, 130.38, 128.80, 128.47, 128.14, 126.75, 125.73, 88.82, 80.44, 77.16, 76.90, 56.82, 38.46, 30.78

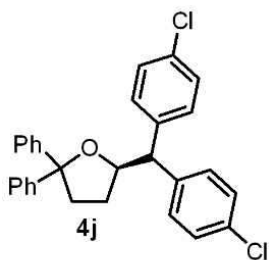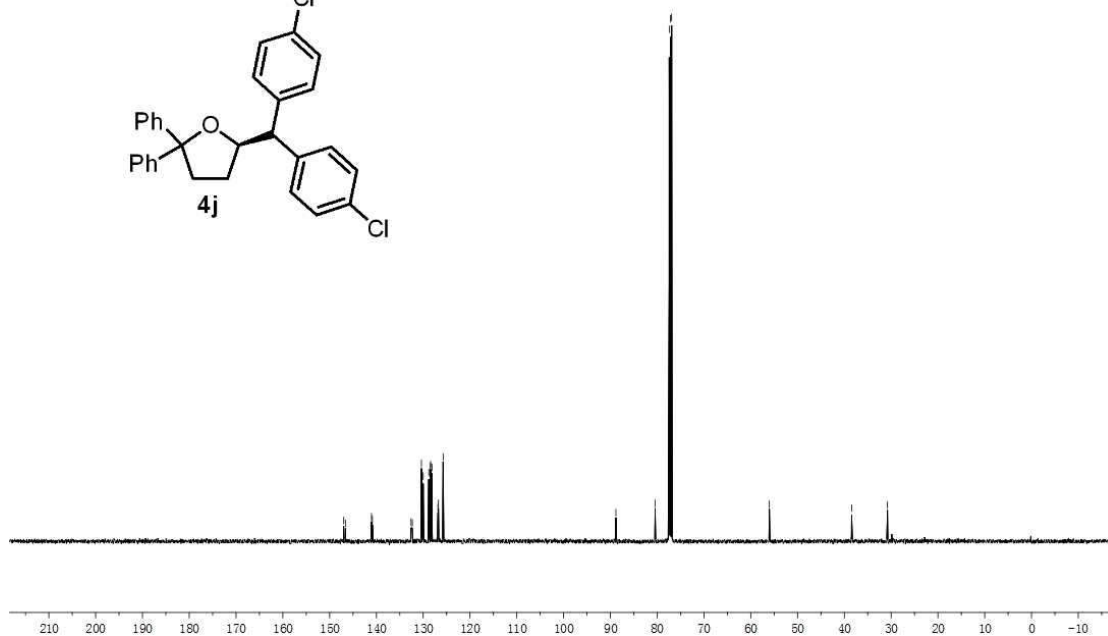

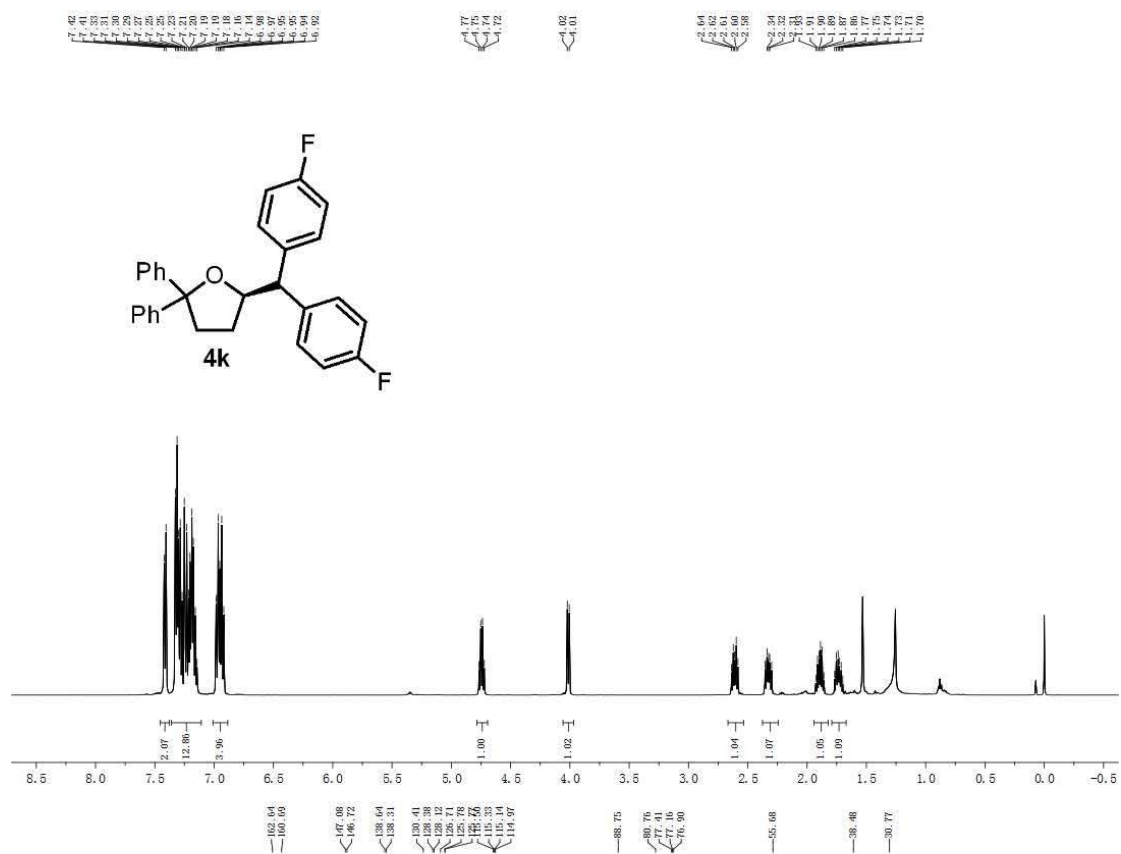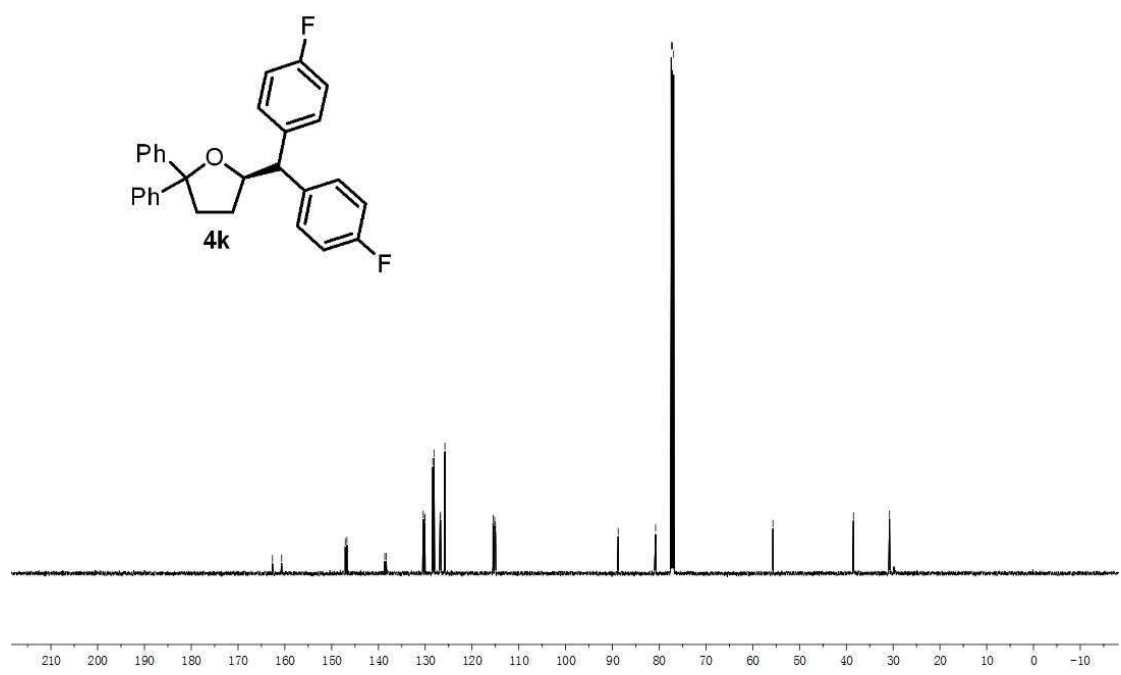

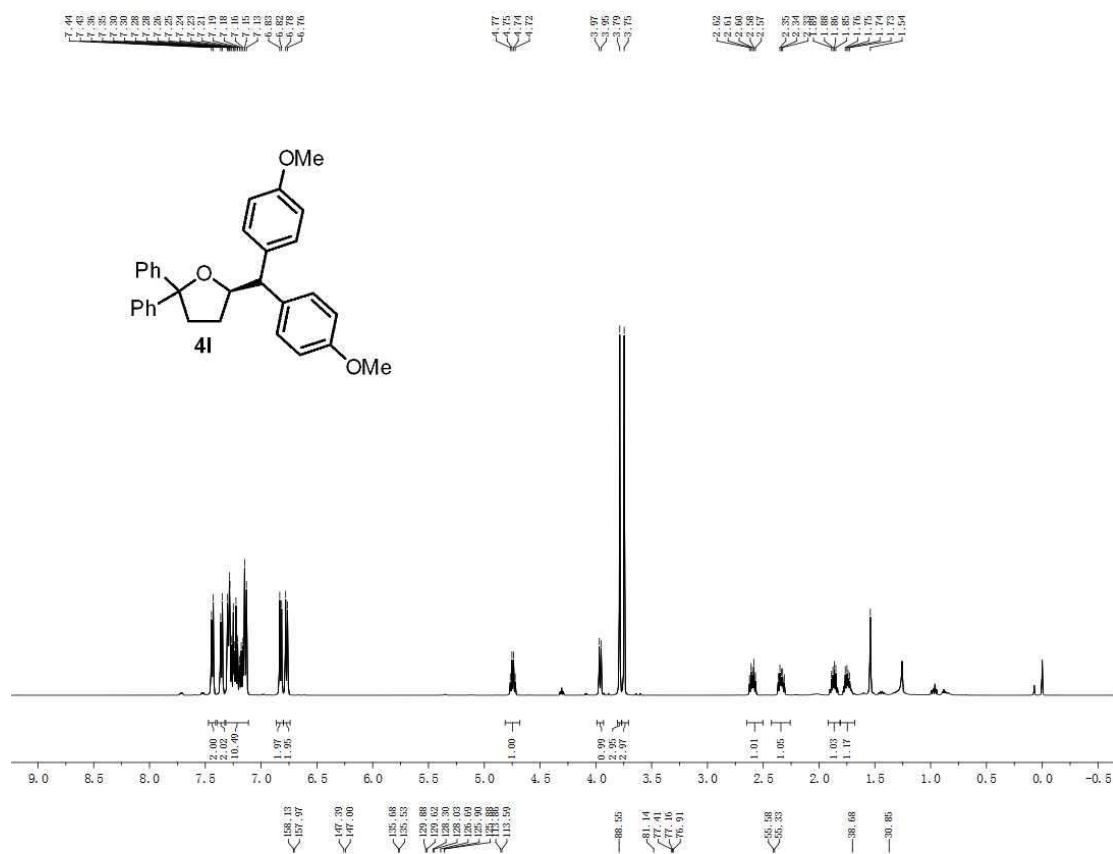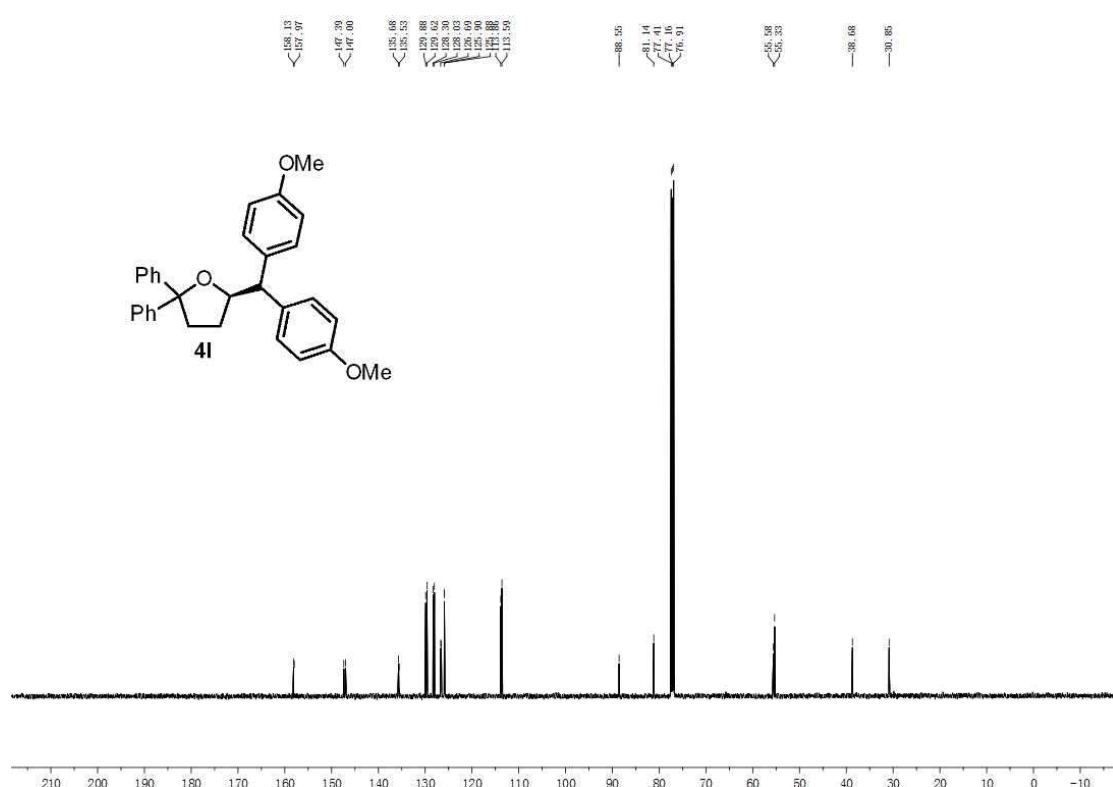

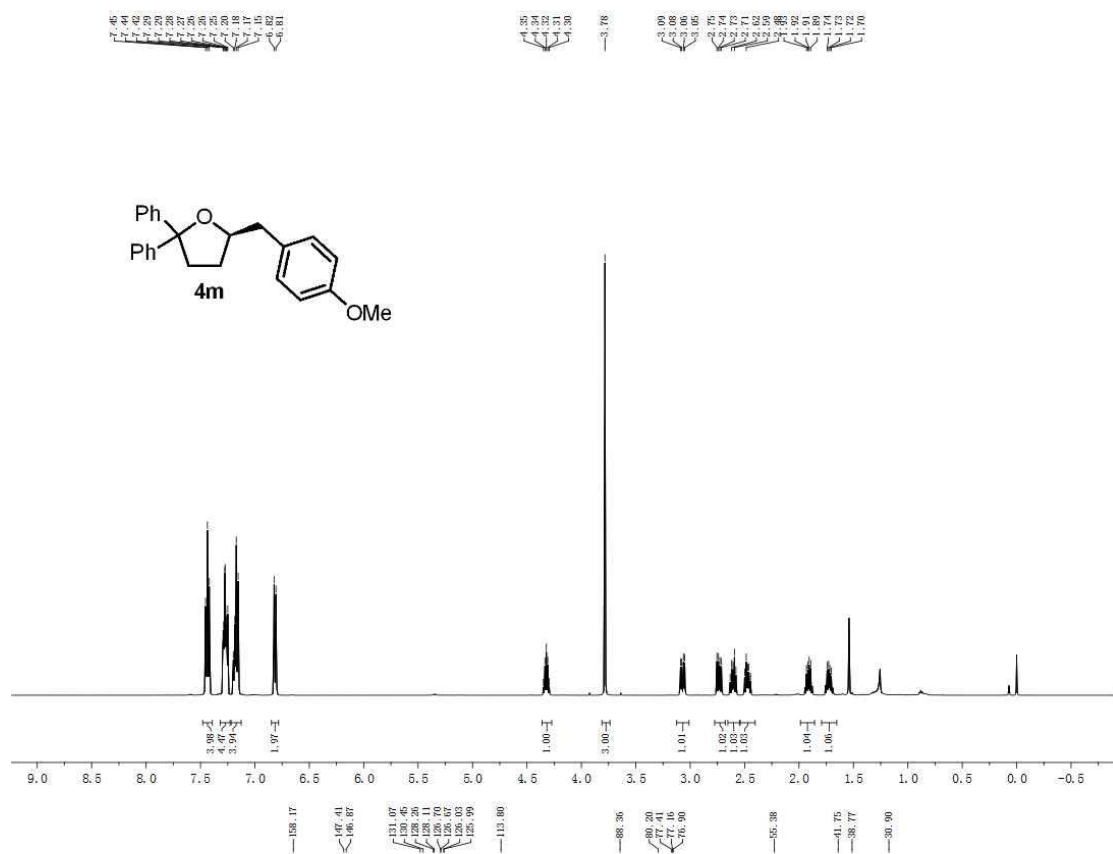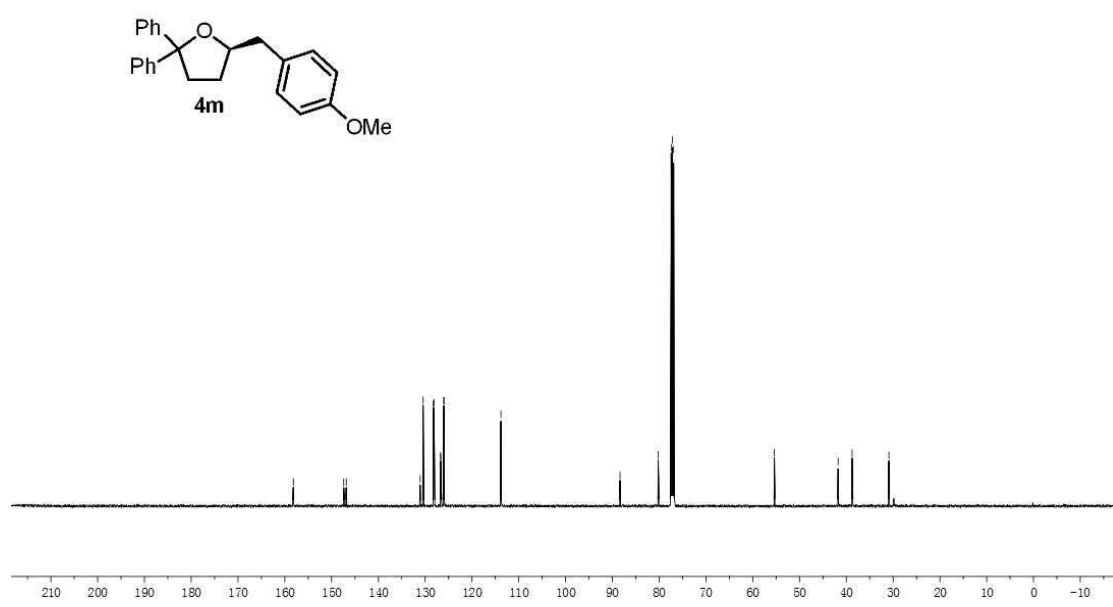

7.48  
7.47  
7.46  
7.45  
7.44  
7.43  
7.42  
7.41  
7.40  
7.39  
7.38  
7.37  
7.36  
7.35  
7.34  
7.33  
7.32  
7.31  
7.30  
7.29  
7.28  
7.27  
7.26  
7.25  
7.24  
7.23  
7.22  
7.21  
7.20  
7.19  
7.18  
7.17  
7.16  
7.15  
7.14  
7.13  
7.12  
7.11  
7.10  
7.09  
7.08  
7.07  
7.06  
7.05  
7.04  
7.03  
7.02  
7.01  
7.00

3.29  
3.28  
3.27  
3.26  
3.25

2.29  
2.28  
2.27  
2.26  
2.25  
2.24  
2.23  
2.22  
2.21  
2.20  
2.19  
2.18  
2.17  
2.16  
2.15  
2.14  
2.13  
2.12  
2.11  
2.10  
2.09  
2.08  
2.07  
2.06  
2.05  
2.04  
2.03  
2.02  
2.01  
2.00  
1.99  
1.98  
1.97  
1.96  
1.95  
1.94  
1.93  
1.92  
1.91  
1.90  
1.89  
1.88  
1.87  
1.86  
1.85  
1.84  
1.83  
1.82  
1.81  
1.80  
1.79  
1.78  
1.77  
1.76  
1.75  
1.74  
1.73  
1.72  
1.71  
1.70  
1.69  
1.68  
1.67  
1.66  
1.65  
1.64  
1.63  
1.62  
1.61  
1.60  
1.59  
1.58  
1.57  
1.56  
1.55  
1.54  
1.53  
1.52  
1.51  
1.50  
1.49  
1.48  
1.47  
1.46  
1.45  
1.44  
1.43  
1.42  
1.41  
1.40  
1.39  
1.38  
1.37  
1.36  
1.35  
1.34  
1.33  
1.32  
1.31  
1.30  
1.29  
1.28  
1.27  
1.26  
1.25  
1.24  
1.23  
1.22  
1.21  
1.20  
1.19  
1.18  
1.17  
1.16  
1.15  
1.14  
1.13  
1.12  
1.11  
1.10  
1.09  
1.08  
1.07  
1.06  
1.05  
1.04  
1.03  
1.02  
1.01  
1.00

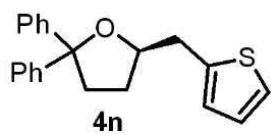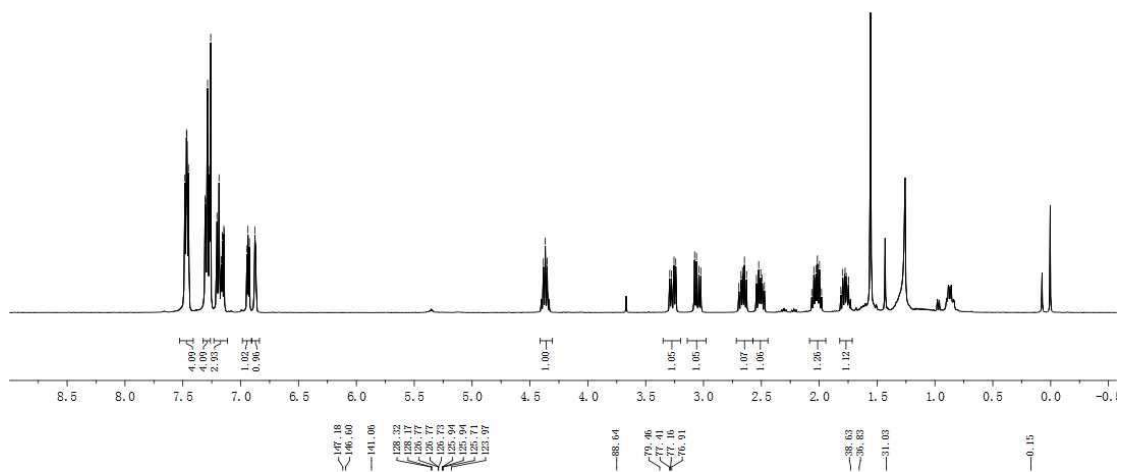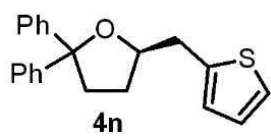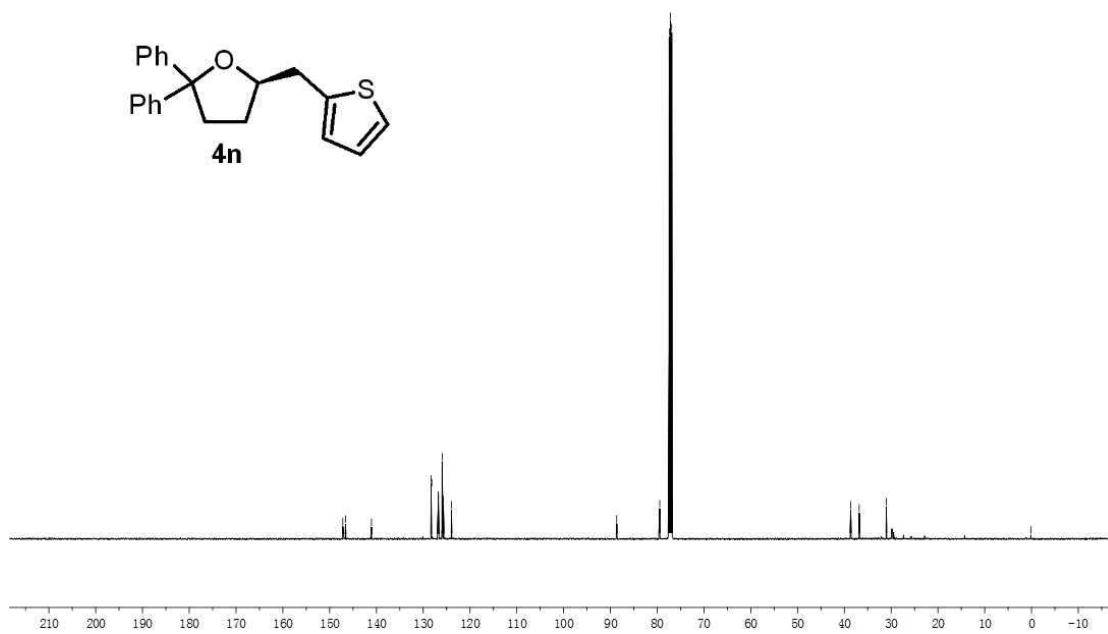



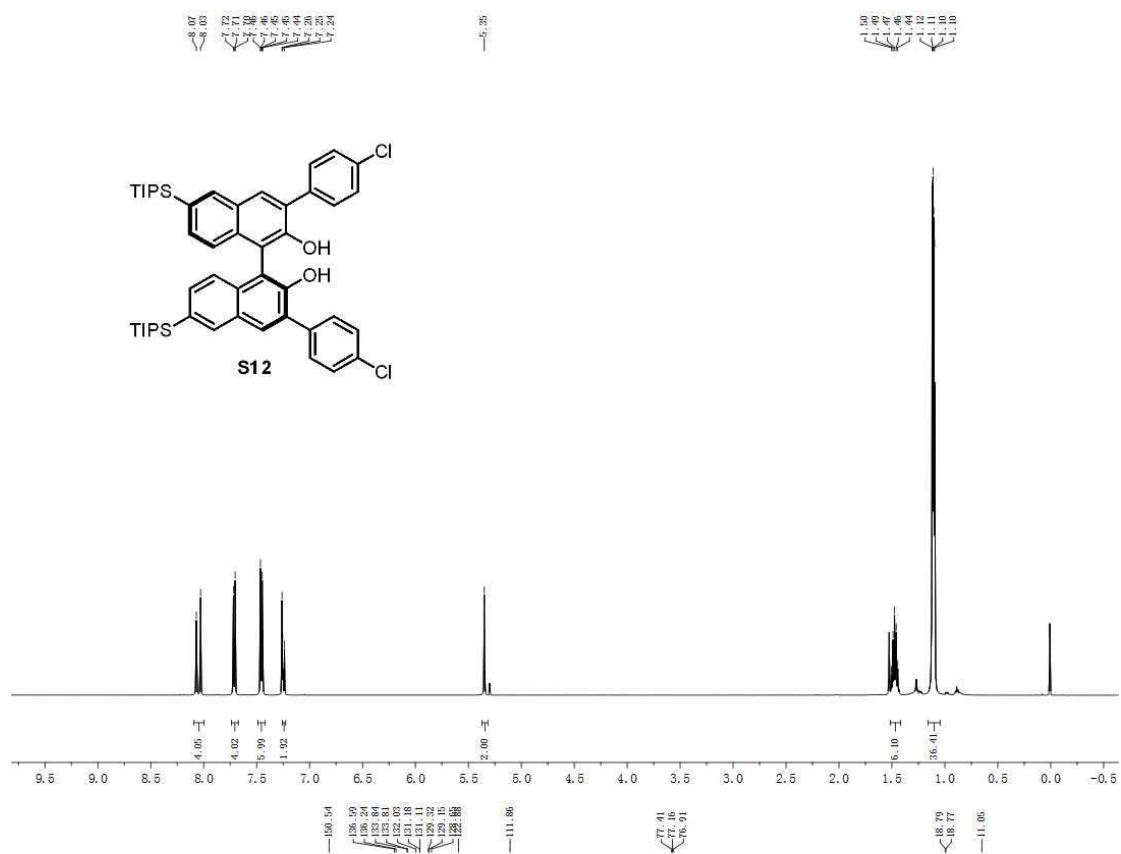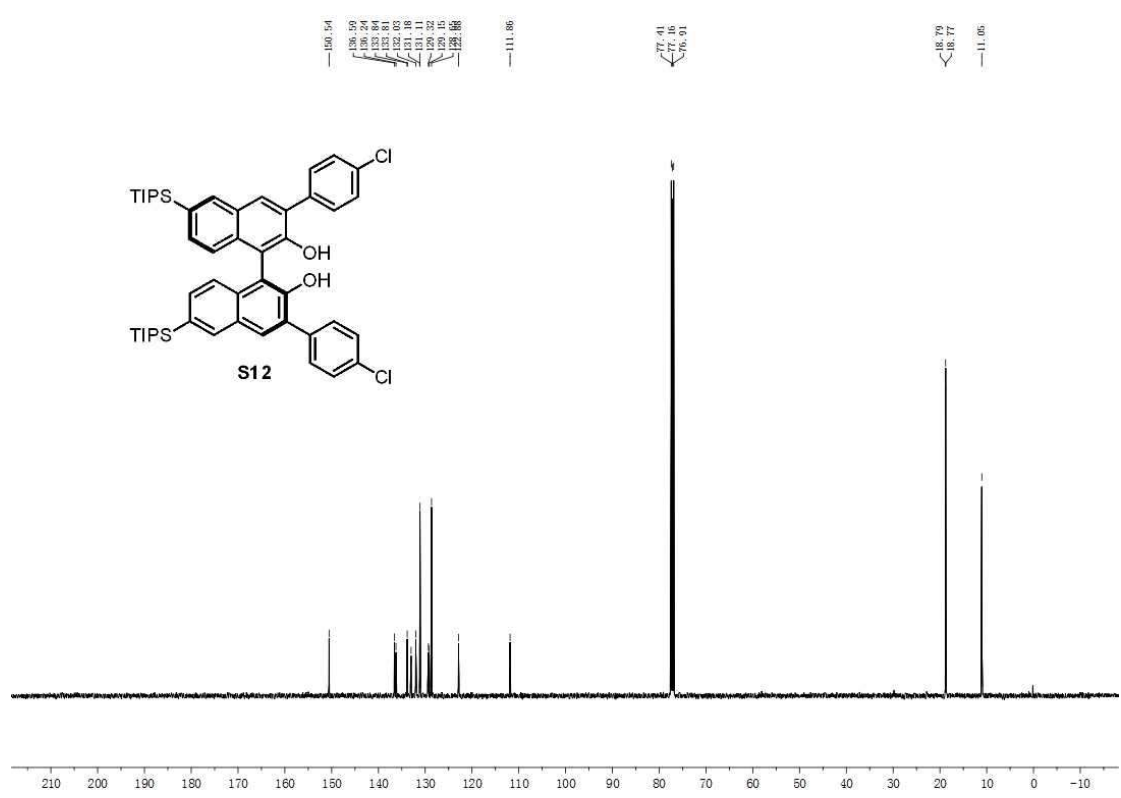

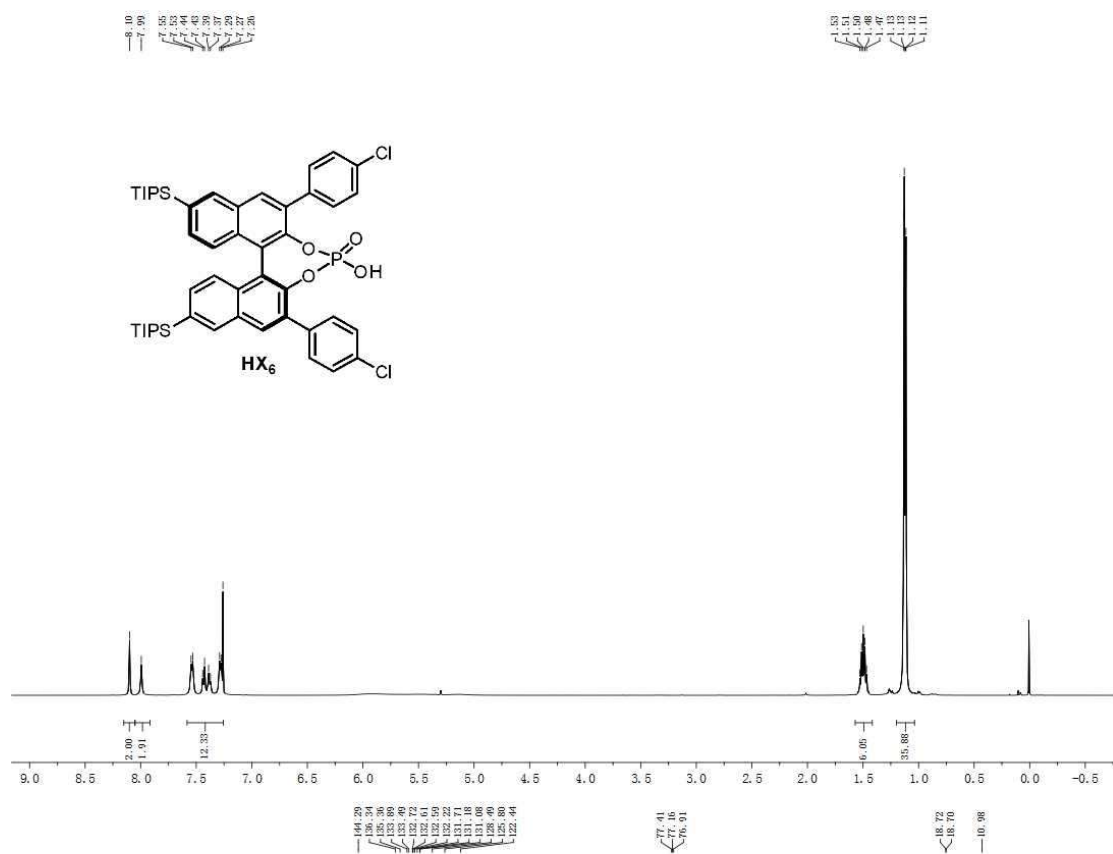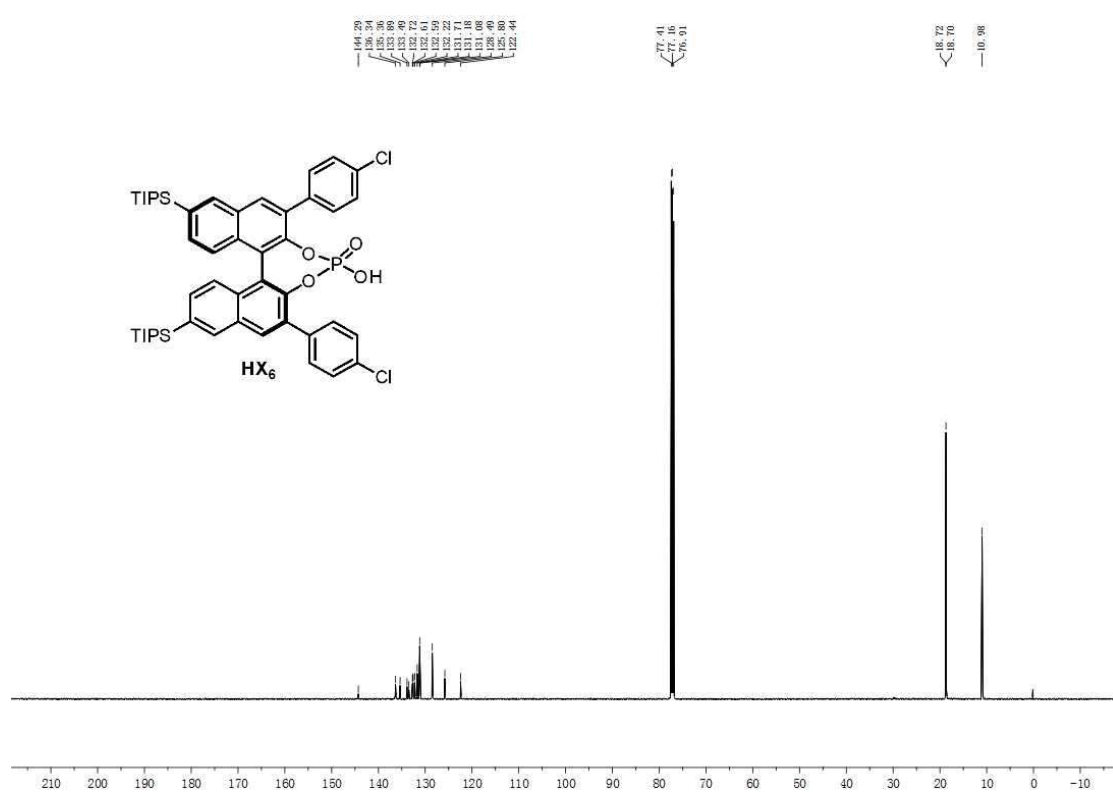

## HPLC Charts

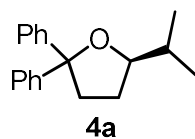

mAU

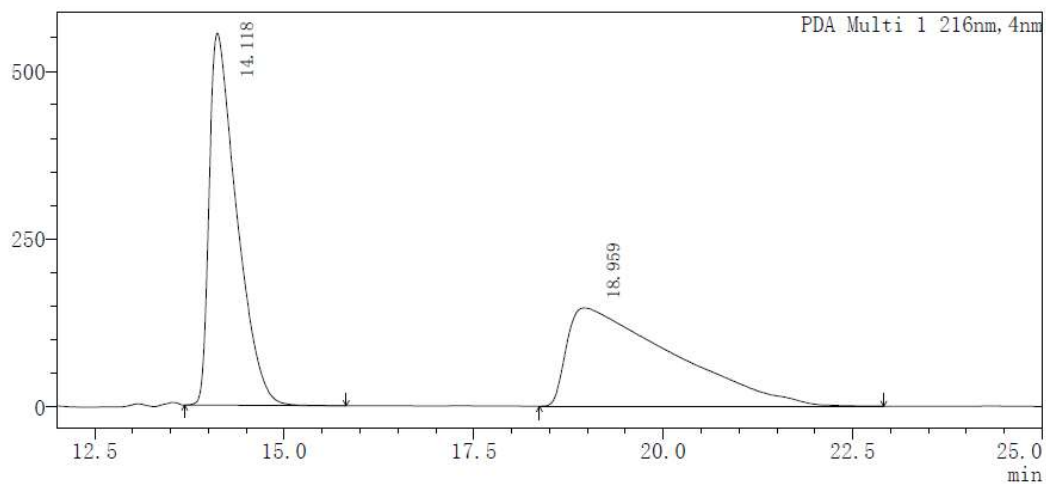

<Peak Results>

PDA Ch1 216nm

| Index | Time/min | Height/mAU | Quantity/Area | Area %/% |
|-------|----------|------------|---------------|----------|
| 1     | 14.118   | 554136     | 13973099      | 49.522   |
| 2     | 18.959   | 146446     | 14243116      | 50.478   |

mAU

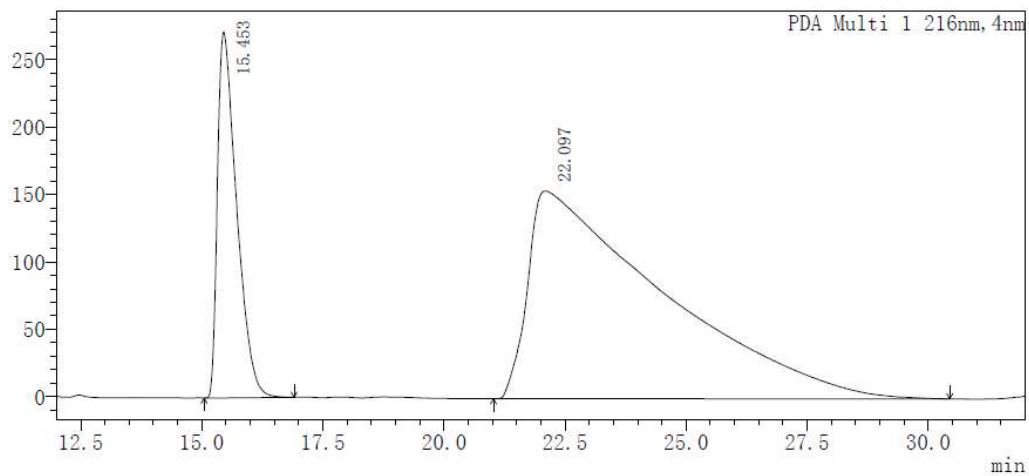

<Peak Results>

PDA Ch1 216nm

| Index | Time/min | Height/mAU | Quantity/Area | Area %/% |
|-------|----------|------------|---------------|----------|
| 1     | 15.453   | 271368     | 7477985       | 20.051   |
| 2     | 22.097   | 153954     | 29816818      | 79.949   |

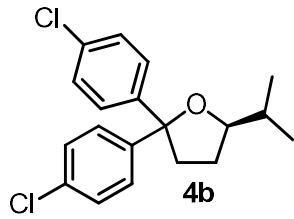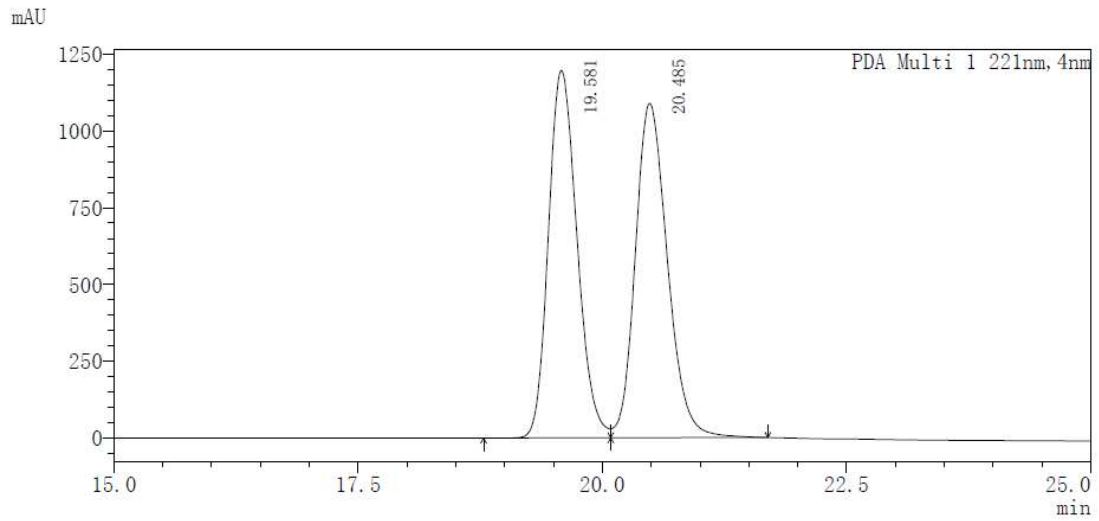

<Peak Results>

PDA Ch1 221nm

| Index | Time/min | Height/mAU | Quantity/Area | Area %/% |
|-------|----------|------------|---------------|----------|
| 1     | 19.581   | 1196793    | 24361433      | 49.424   |
| 2     | 20.485   | 1089015    | 24929696      | 50.576   |

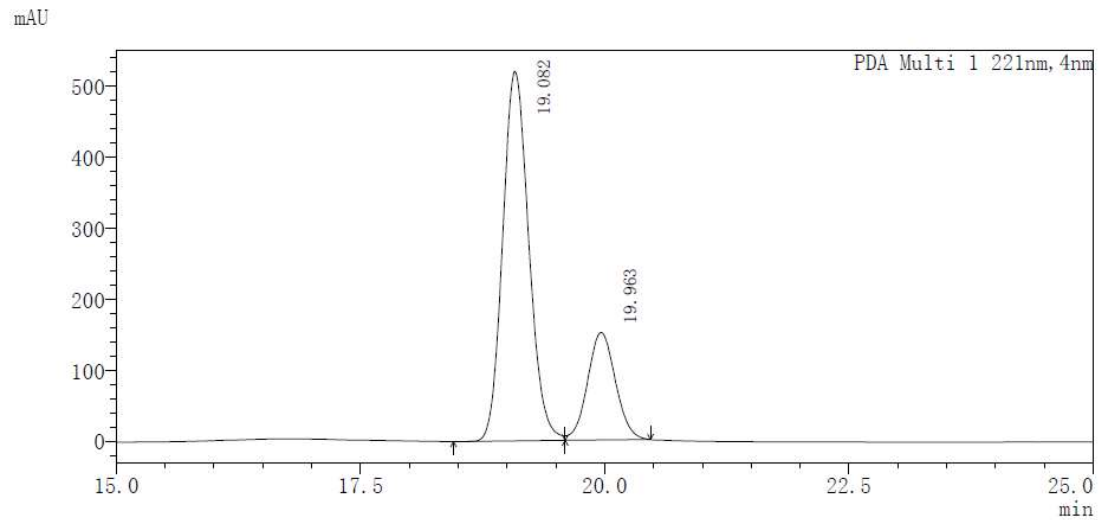

<Peak Results>

PDA Ch1 221nm

| Index | Time/min | Height/mAU | Quantity/Area | Area %/% |
|-------|----------|------------|---------------|----------|
| 1     | 19.082   | 519821     | 9650532       | 76.231   |
| 2     | 19.963   | 151511     | 3008984       | 23.769   |

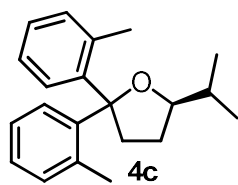

mAU

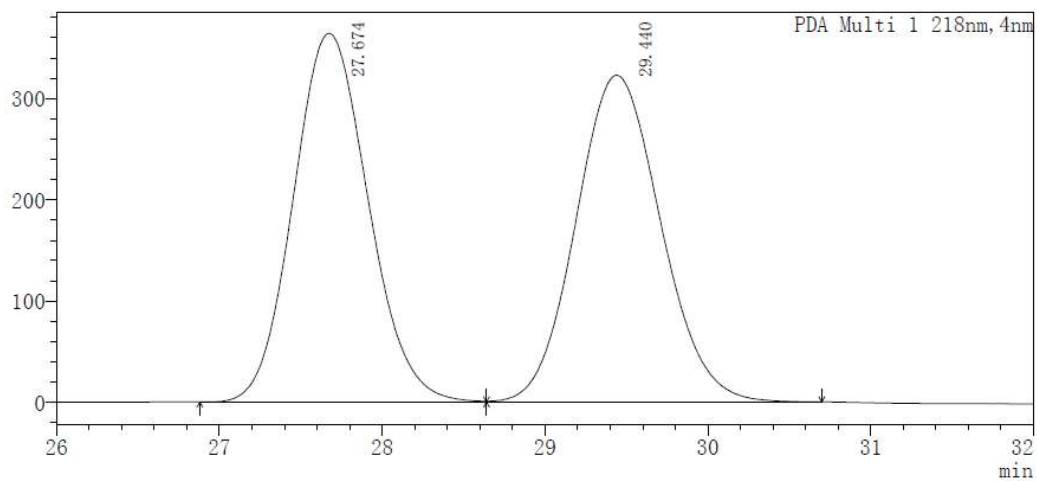

<Peak Results>

PDA Ch1 218nm

| Index | Time/min | Height/mAU | Quantity/Area | Area %/ % |
|-------|----------|------------|---------------|-----------|
| 1     | 27.674   | 363887     | 11644395      | 49.935    |
| 2     | 29.440   | 322545     | 11674498      | 50.065    |

mAU

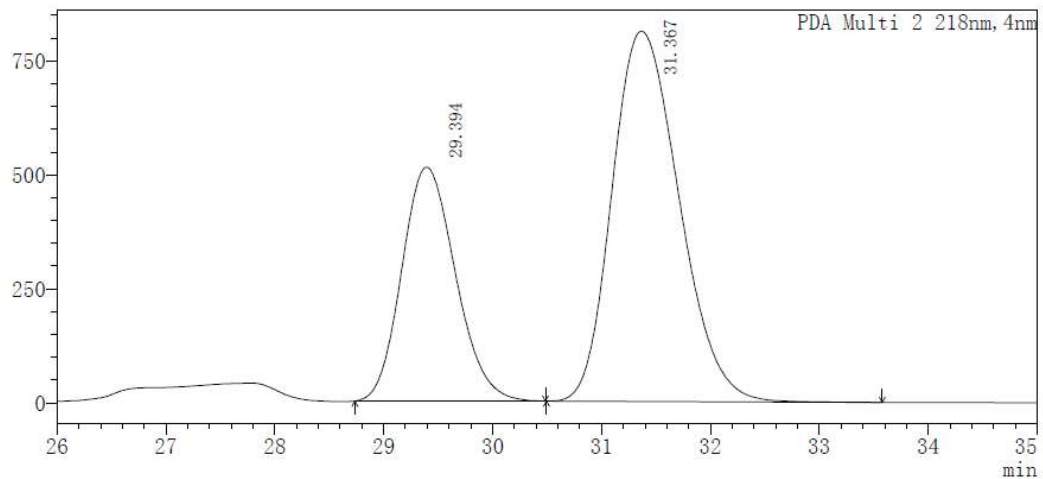

<Peak Results>

PDA Ch2 218nm

| Index | Time/min | Height/mAU | Quantity/Area | Area %/ % |
|-------|----------|------------|---------------|-----------|
| 1     | 29.394   | 512944     | 17592214      | 33.605    |
| 2     | 31.367   | 812325     | 34757314      | 66.395    |

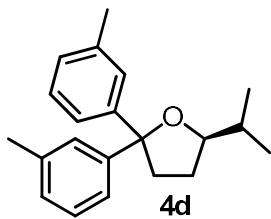

mAU

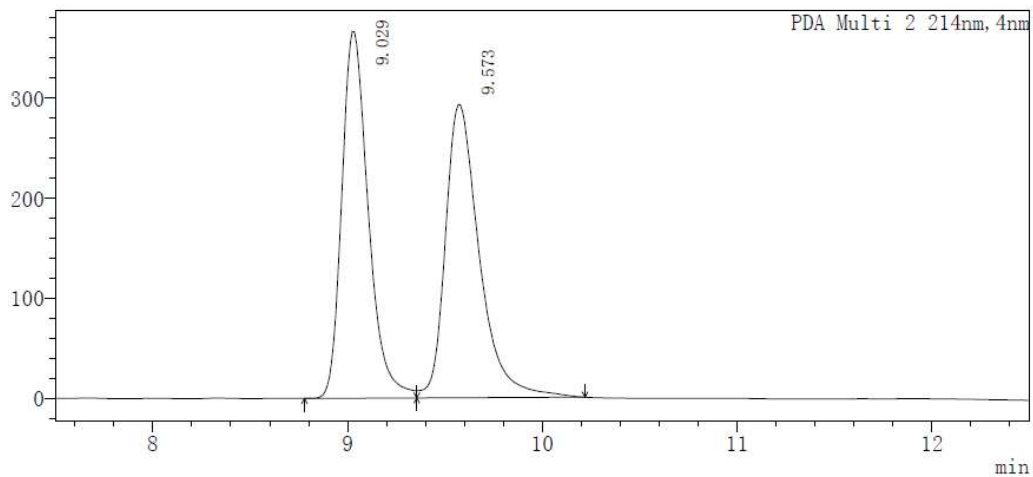

<Peak Results>

PDA Ch2 214nm

| Index | Time/min | Height/mAU | Quantity/Area | Area %/ % |
|-------|----------|------------|---------------|-----------|
| 1     | 9.029    | 366243     | 3476329       | 49.463    |
| 2     | 9.573    | 292822     | 3551773       | 50.537    |

mAU

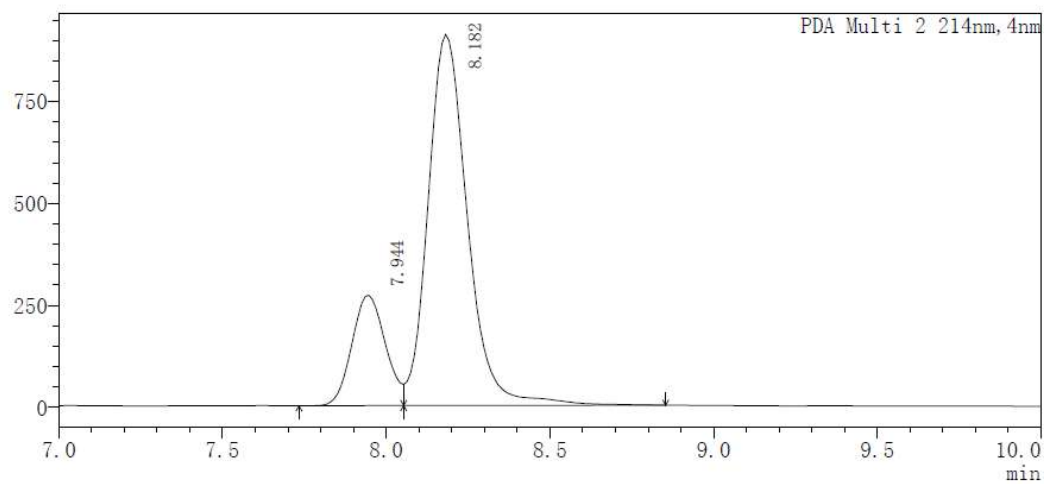

<Peak Results>

PDA Ch2 214nm

| Index | Time/min | Height/mAU | Quantity/Area | Area %/ % |
|-------|----------|------------|---------------|-----------|
| 1     | 7.944    | 271139     | 1944982       | 20.382    |
| 2     | 8.182    | 909439     | 7597646       | 79.618    |

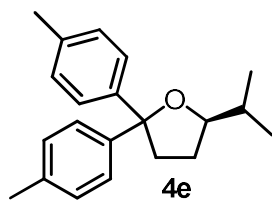

mAU

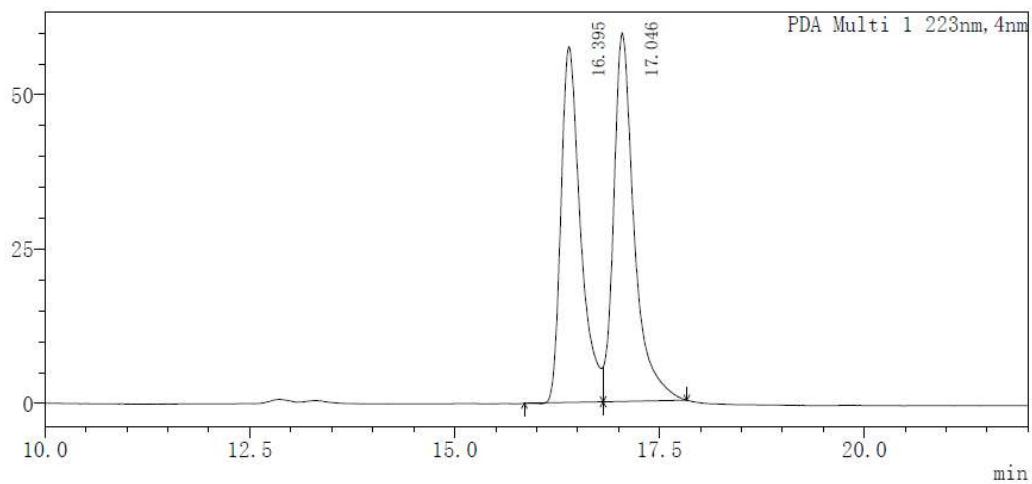

<Peak Results>

PDA Ch1 223nm

| Index | Time/min | Height/mAU | Quantity/Area | Area %/% |
|-------|----------|------------|---------------|----------|
| 1     | 16.395   | 57607      | 957056        | 47.961   |
| 2     | 17.046   | 59666      | 1038435       | 52.039   |

mAU

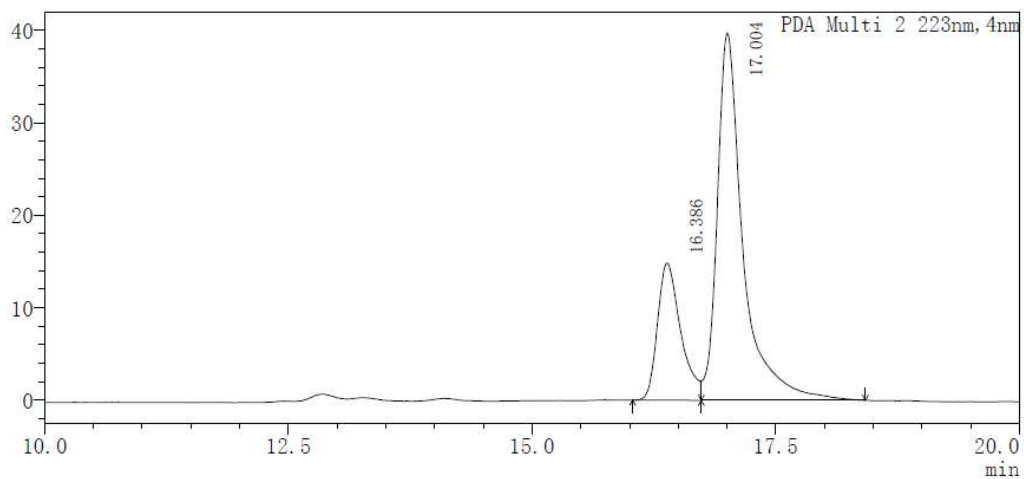

<Peak Results>

PDA Ch2 223nm

| Index | Time/min | Height/mAU | Quantity/Area | Area %/% |
|-------|----------|------------|---------------|----------|
| 1     | 16.386   | 14836      | 246173        | 25.223   |
| 2     | 17.004   | 39690      | 729796        | 74.777   |

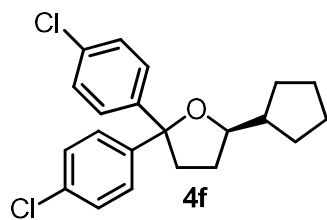

mAU

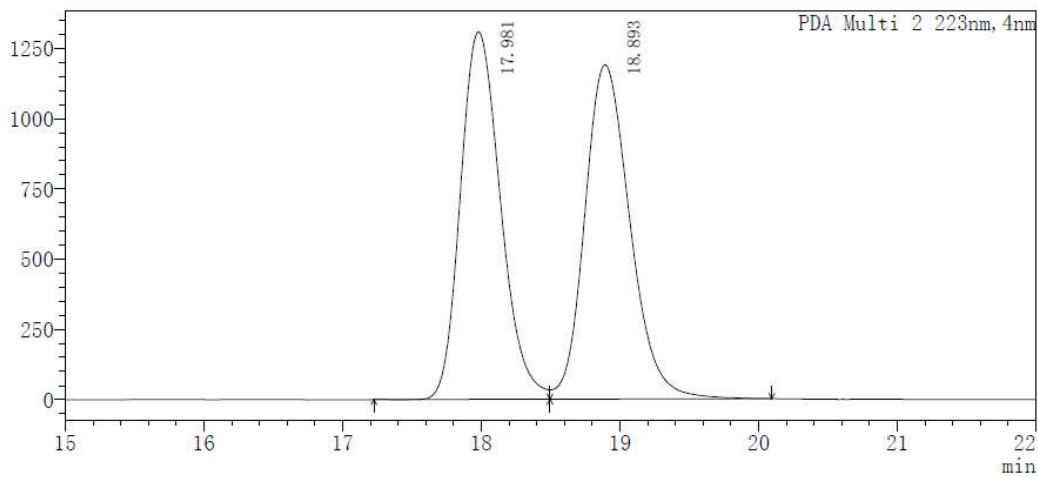

<Peak Results>

PDA Ch2 223nm

| Index | Time/min | Height/mAU | Quantity/Area | Area %/% |
|-------|----------|------------|---------------|----------|
| 1     | 17.981   | 1309002    | 26280953      | 49.337   |
| 2     | 18.893   | 1190602    | 26986929      | 50.663   |

mAU

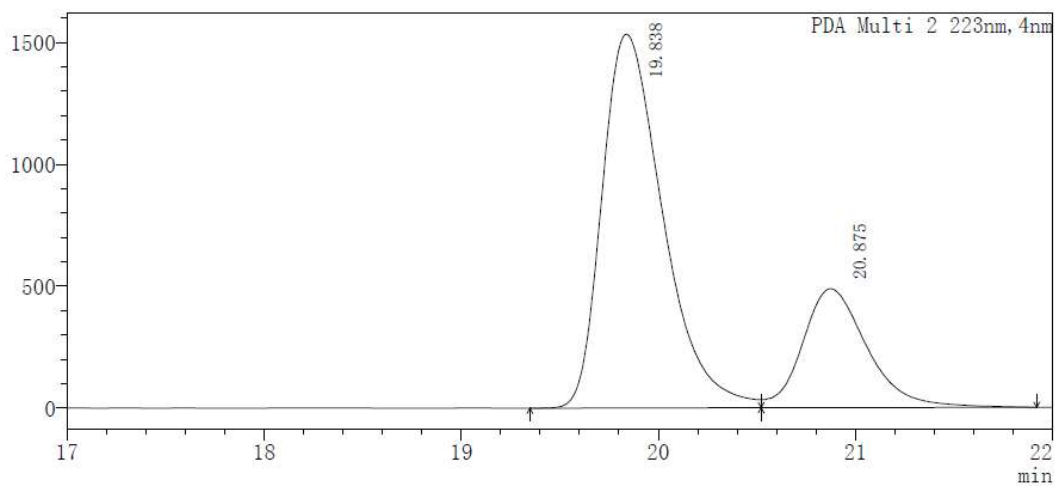

<Peak Results>

PDA Ch2 223nm

| Index | Time/min | Height/mAU | Quantity/Area | Area %/% |
|-------|----------|------------|---------------|----------|
| 1     | 19.838   | 1532511    | 32923453      | 74.761   |
| 2     | 20.875   | 487556     | 11115091      | 25.239   |



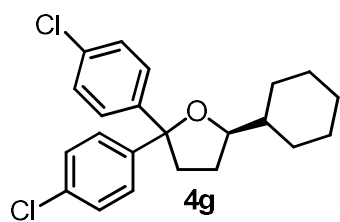

mAU

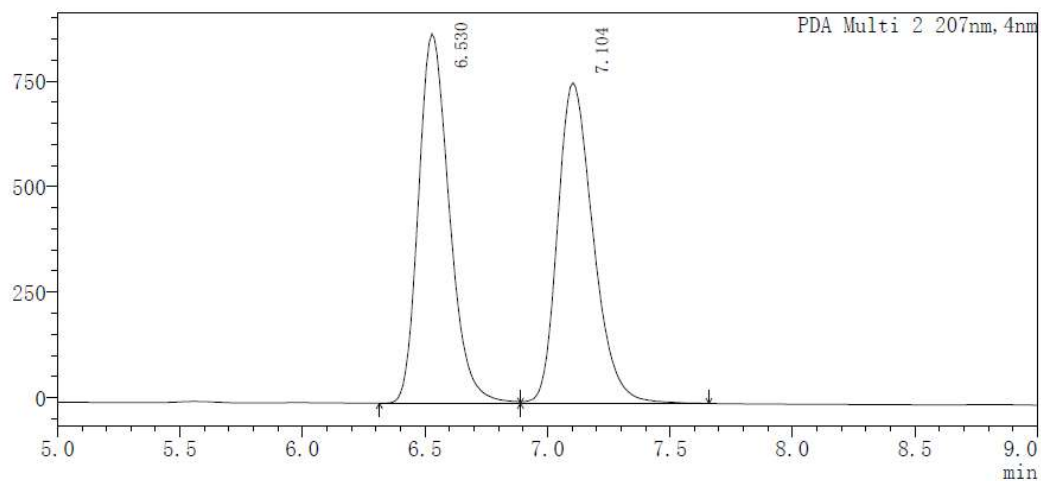

<Peak Results>

PDA Ch2 207nm

| Index | Time/min | Height/mAU | Quantity/Area | Area %/% |
|-------|----------|------------|---------------|----------|
| 1     | 6.530    | 874914     | 7680842       | 49.994   |
| 2     | 7.104    | 759638     | 7682567       | 50.006   |

mAU

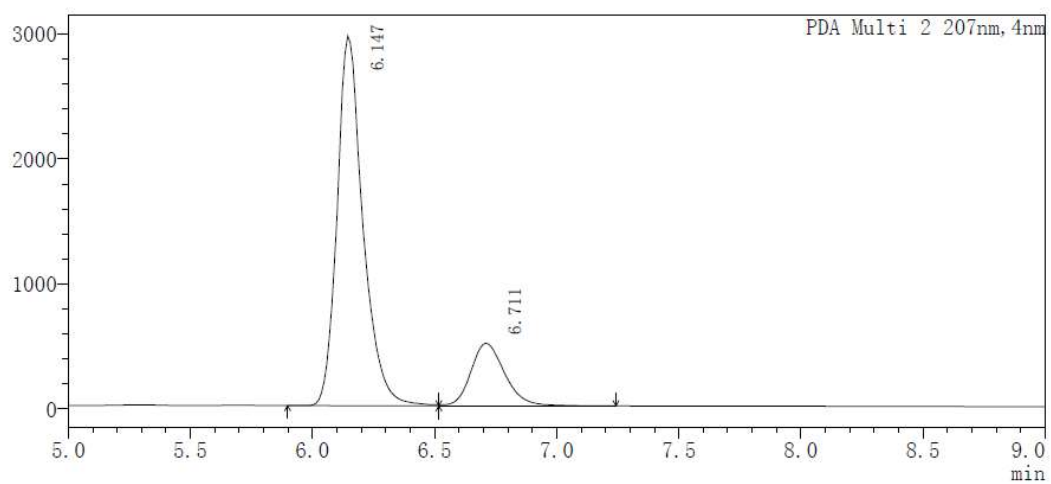

<Peak Results>

PDA Ch2 207nm

| Index | Time/min | Height/mAU | Quantity/Area | Area %/% |
|-------|----------|------------|---------------|----------|
| 1     | 6.147    | 2960635    | 21863060      | 81.929   |
| 2     | 6.711    | 501686     | 4822224       | 18.071   |

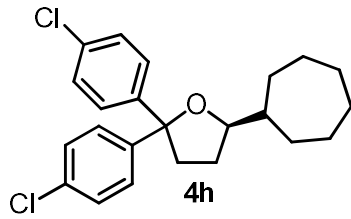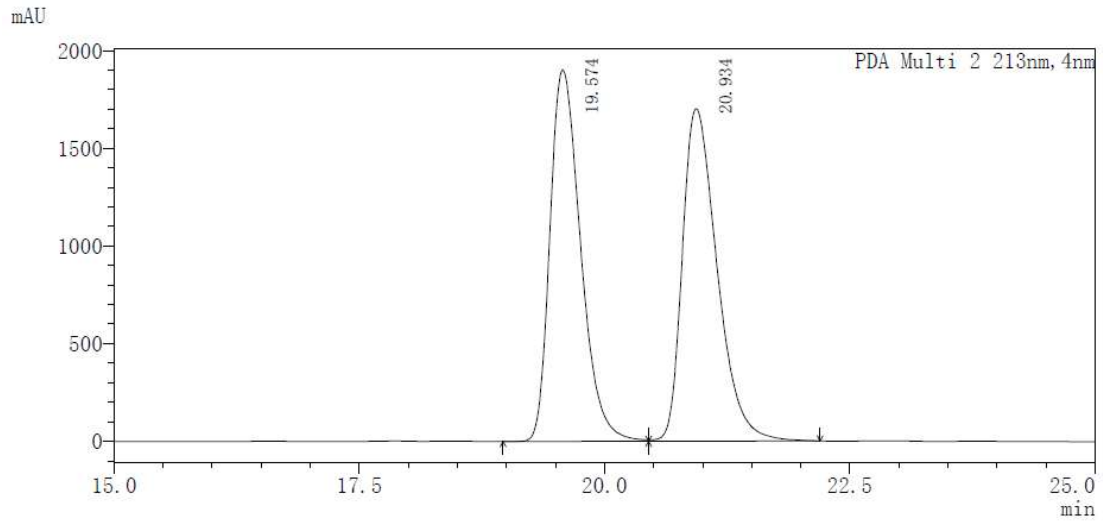

<Peak Results>

PDA Ch2 213nm

| Index | Time/min | Height/mAU | Quantity/Area | Area %/% |
|-------|----------|------------|---------------|----------|
| 1     | 19.574   | 1902640    | 41360332      | 49.631   |
| 2     | 20.934   | 1702383    | 41975472      | 50.369   |

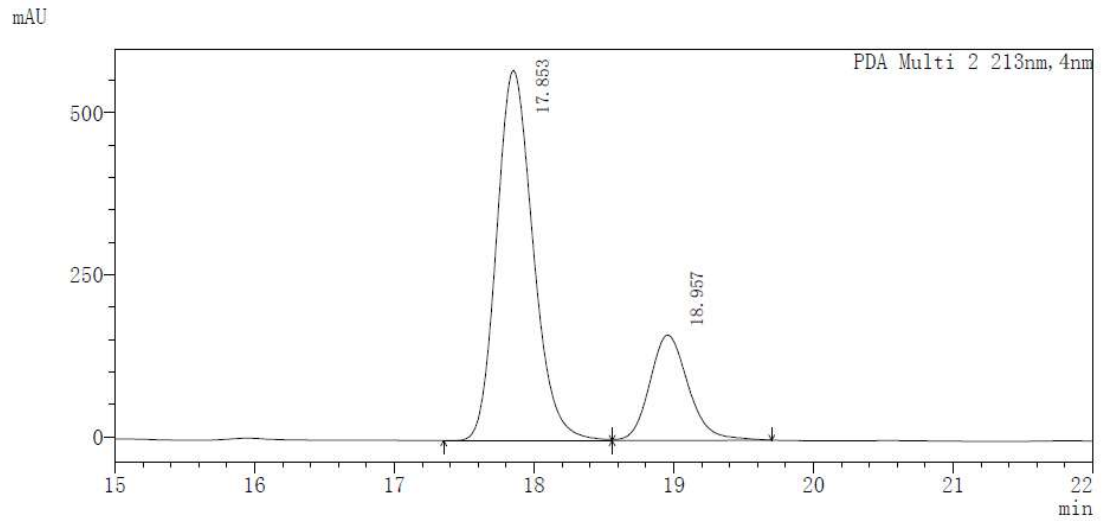

<Peak Results>

PDA Ch2 213nm

| Index | Time/min | Height/mAU | Quantity/Area | Area %/% |
|-------|----------|------------|---------------|----------|
| 1     | 17.853   | 571290     | 10358754      | 76.891   |
| 2     | 18.957   | 162485     | 3113177       | 23.109   |

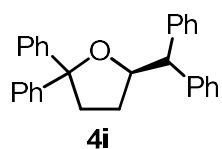

mAU

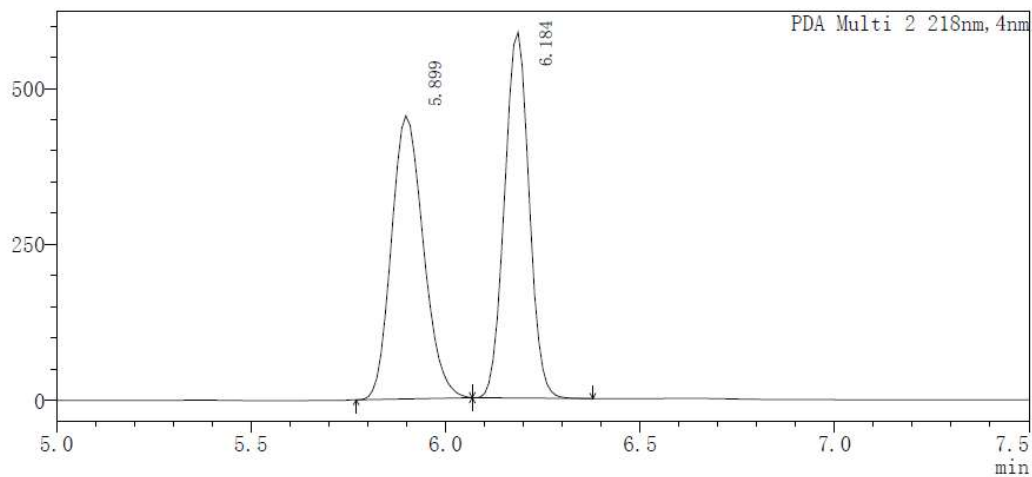

<Peak Results>

PDA Ch2 218nm

| Index | Time/min | Height/mAU | Quantity/Area | Area %/ % |
|-------|----------|------------|---------------|-----------|
| 1     | 5.899    | 454043     | 2595308       | 50.162    |
| 2     | 6.184    | 586516     | 2578594       | 49.838    |

mAU

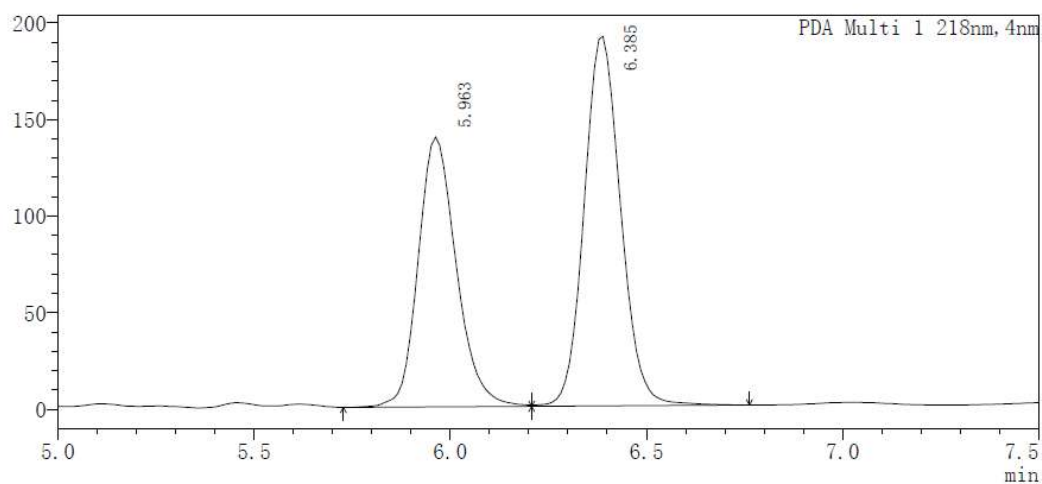

<Peak Results>

PDA Ch1 218nm

| Index | Time/min | Height/mAU | Quantity/Area | Area %/ % |
|-------|----------|------------|---------------|-----------|
| 1     | 5.963    | 139622     | 945553        | 43.319    |
| 2     | 6.385    | 191274     | 1237218       | 56.681    |

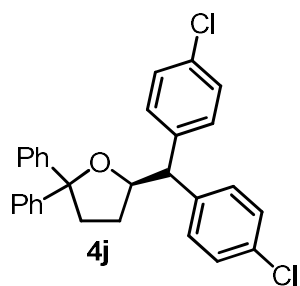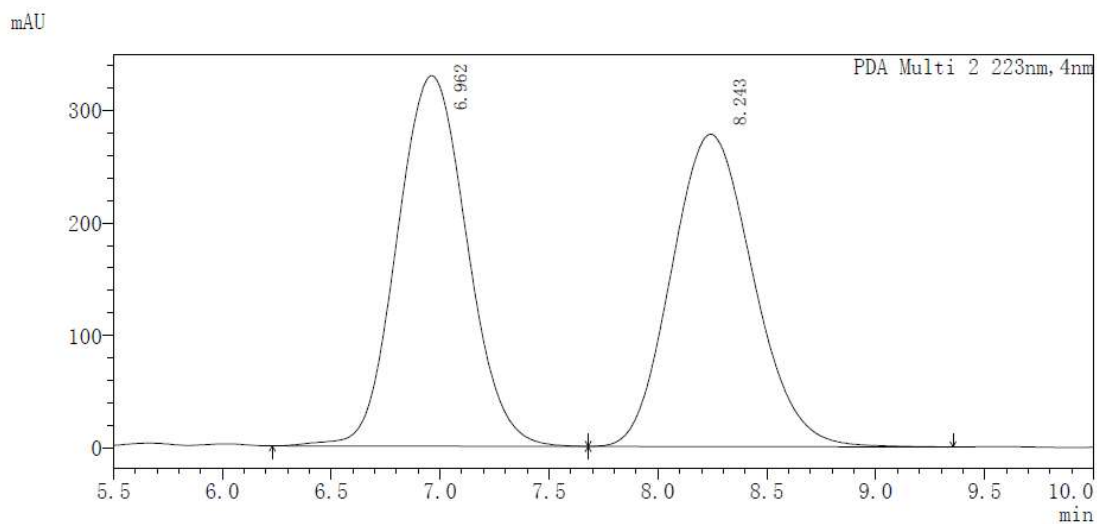

<Peak Results>

PDA Ch2 223nm

| Index | Time/min | Height/mAU | Quantity/Area | Area %/ % |
|-------|----------|------------|---------------|-----------|
| 1     | 6.962    | 329616     | 7371687       | 50.447    |
| 2     | 8.243    | 277970     | 7240953       | 49.553    |

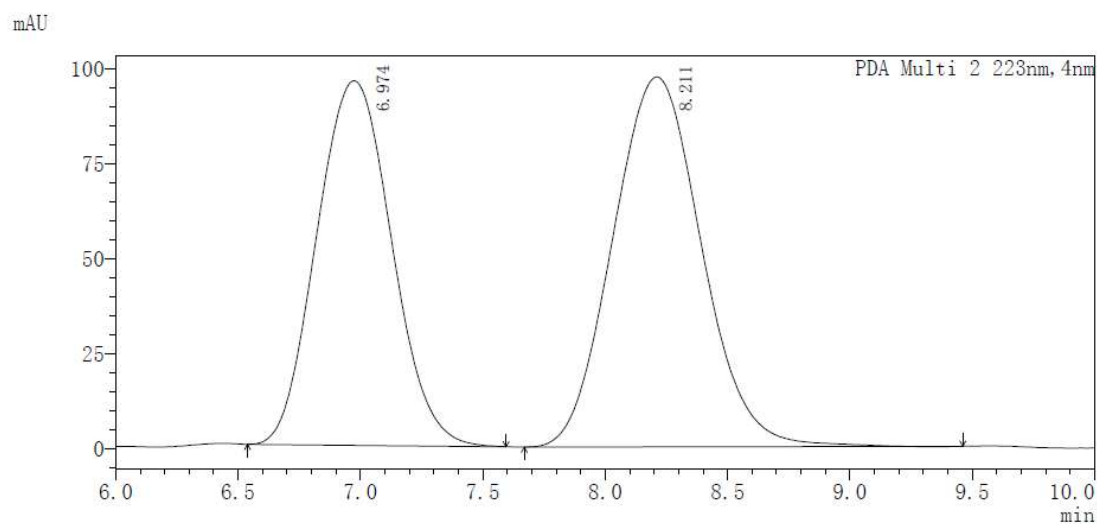

<Peak Results>

PDA Ch2 223nm

| Index | Time/min | Height/mAU | Quantity/Area | Area %/ % |
|-------|----------|------------|---------------|-----------|
| 1     | 6.974    | 95959      | 2042472       | 45.429    |
| 2     | 8.211    | 97341      | 2453477       | 54.571    |

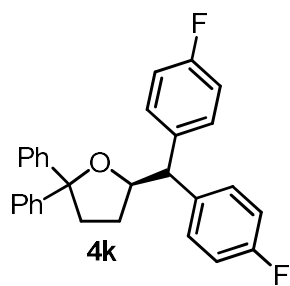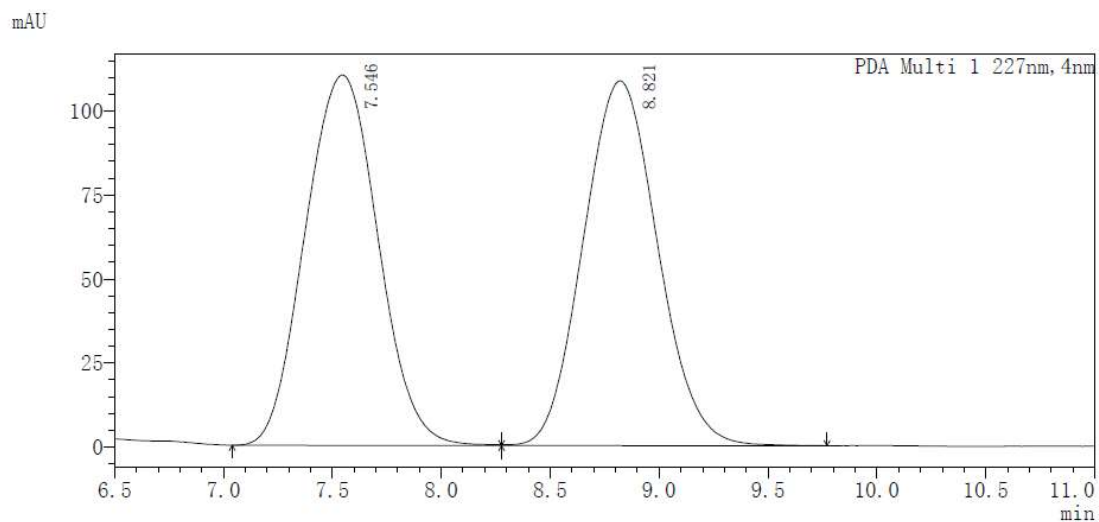

<Peak Results>

PDA Ch1 227nm

| Index | Time/min | Height/mAU | Quantity/Area | Area %/% |
|-------|----------|------------|---------------|----------|
| 1     | 7.546    | 110212     | 2566586       | 49.889   |
| 2     | 8.821    | 108570     | 2577982       | 50.111   |

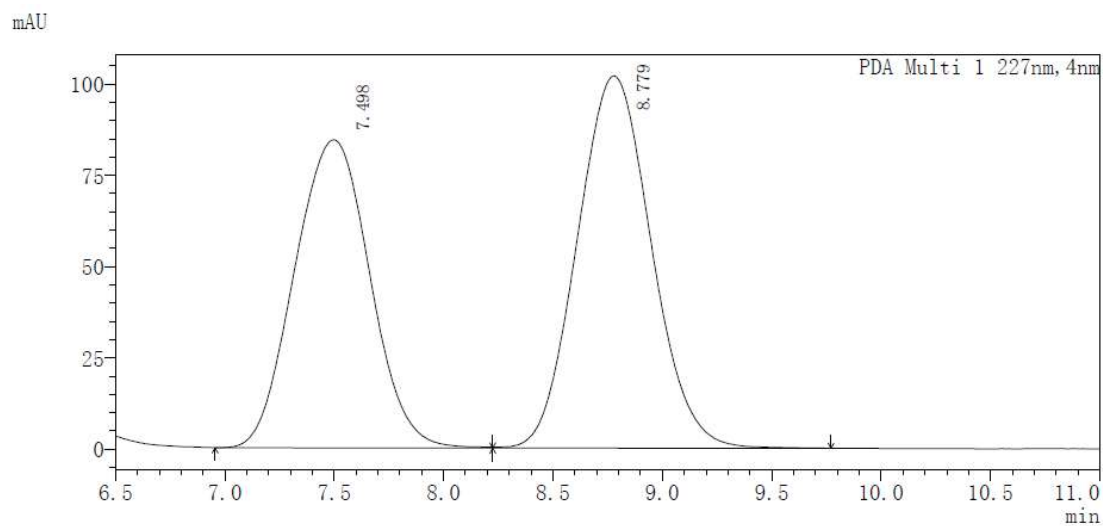

<Peak Results>

PDA Ch1 227nm

| Index | Time/min | Height/mAU | Quantity/Area | Area %/% |
|-------|----------|------------|---------------|----------|
| 1     | 7.498    | 84434      | 2020158       | 45.714   |
| 2     | 8.779    | 101989     | 2398964       | 54.286   |

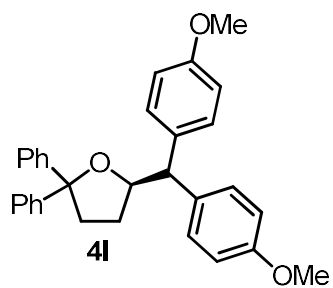

mAU

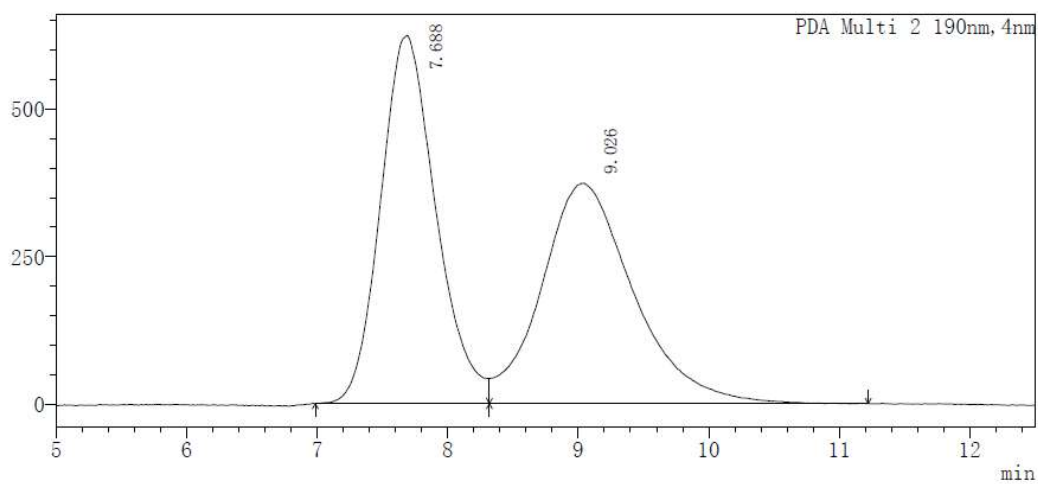

<Peak Results>

PDA Ch2 190nm

| Index | Time/min | Height/mAU | Quantity/Area | Area %/% |
|-------|----------|------------|---------------|----------|
| 1     | 7.688    | 622840     | 18398018      | 50.195   |
| 2     | 9.026    | 372805     | 18254966      | 49.805   |

mAU

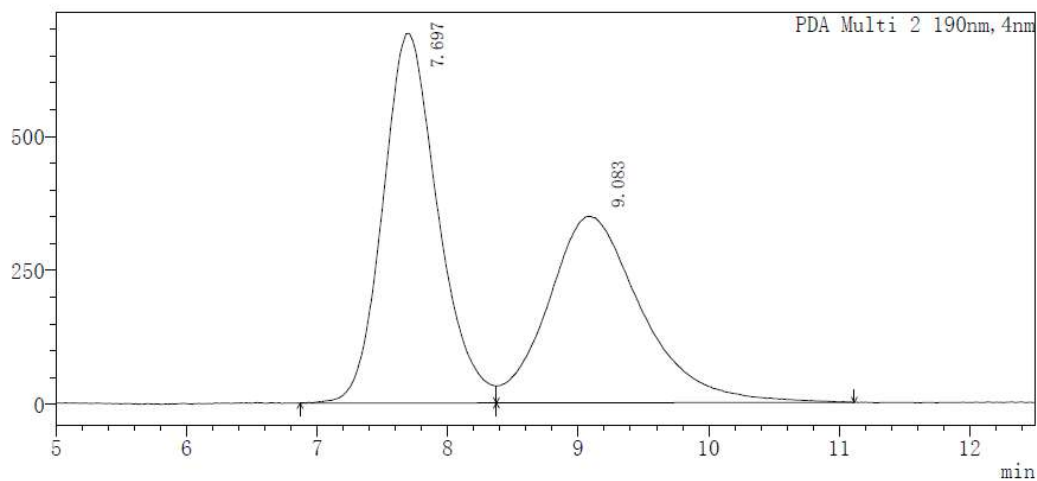

<Peak Results>

PDA Ch2 190nm

| Index | Time/min | Height/mAU | Quantity/Area | Area %/% |
|-------|----------|------------|---------------|----------|
| 1     | 7.697    | 689380     | 20218739      | 53.948   |
| 2     | 9.083    | 347484     | 17259520      | 46.052   |

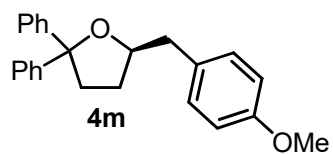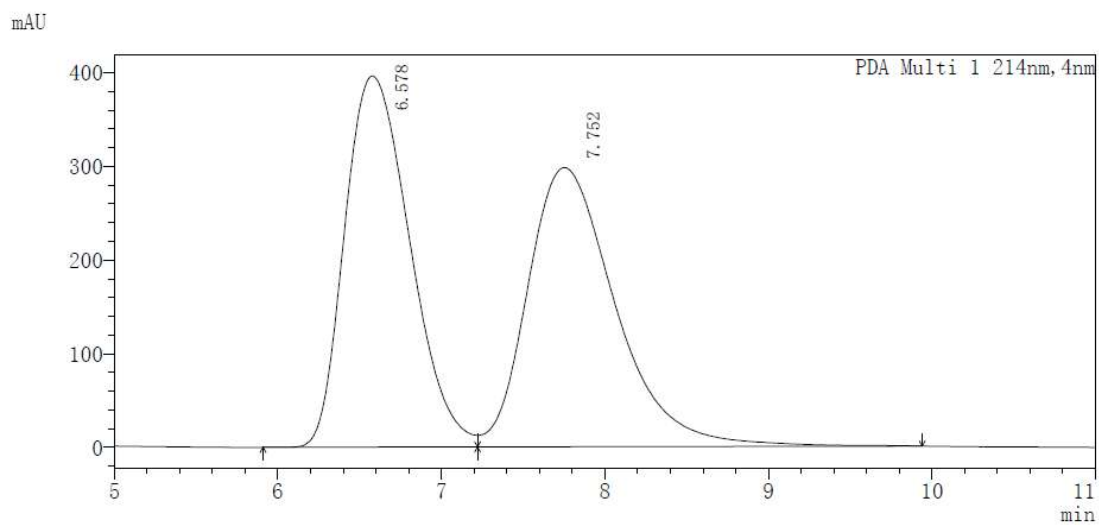

<Peak Results>

PDA Ch1 214nm

| Index | Time/min | Height/mAU | Quantity/Area | Area %/ % |
|-------|----------|------------|---------------|-----------|
| 1     | 6.578    | 396131     | 10963077      | 49.645    |
| 2     | 7.752    | 298017     | 11119955      | 50.355    |

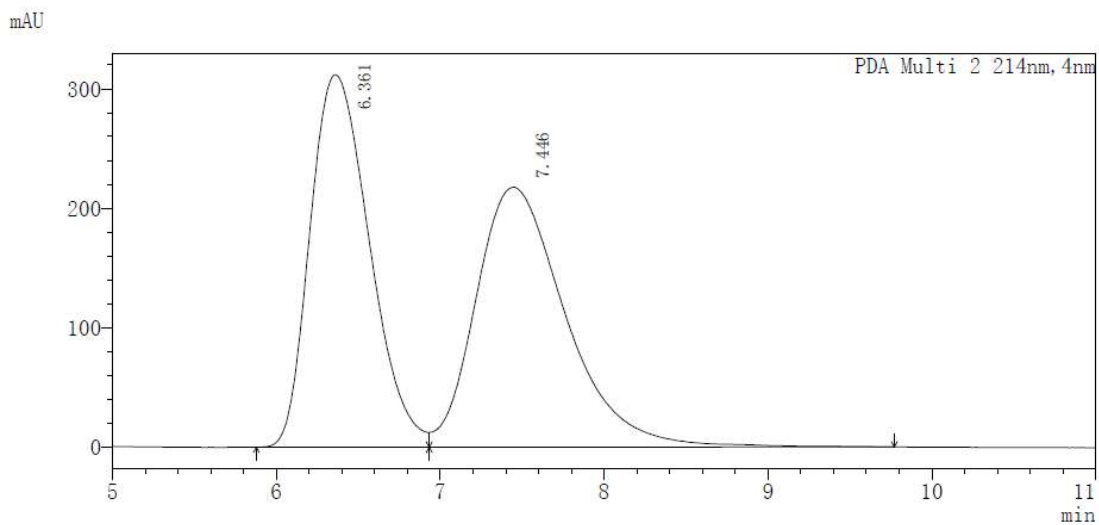

<Peak Results>

PDA Ch2 214nm

| Index | Time/min | Height/mAU | Quantity/Area | Area %/ % |
|-------|----------|------------|---------------|-----------|
| 1     | 6.361    | 311641     | 7854614       | 48.721    |
| 2     | 7.446    | 217515     | 8267050       | 51.279    |

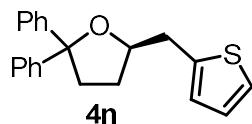

mAU

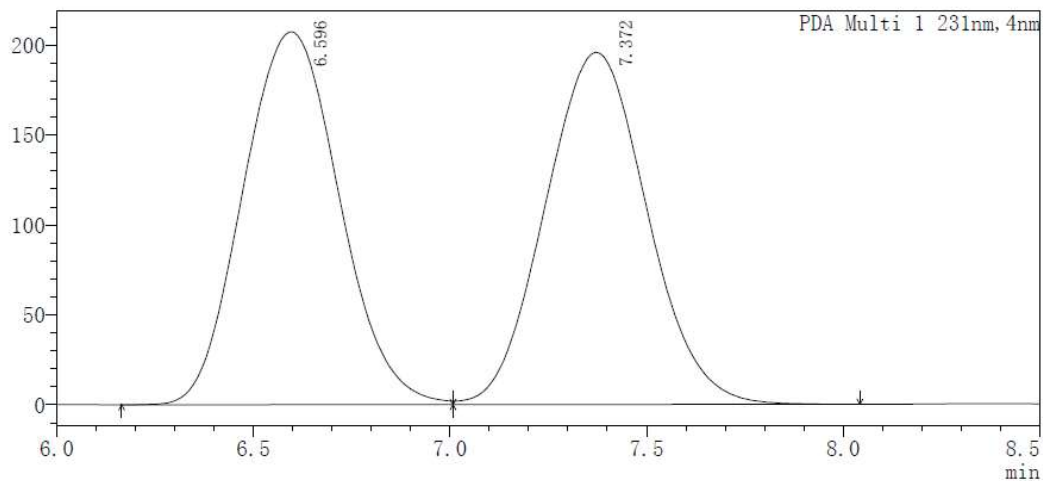

<Peak Results>

PDA Ch1 231nm

| Index | Time/min | Height/mAU | Quantity/Area | Area %/% |
|-------|----------|------------|---------------|----------|
| 1     | 6.596    | 207107     | 3531754       | 50.015   |
| 2     | 7.372    | 195759     | 3529678       | 49.985   |

mAU

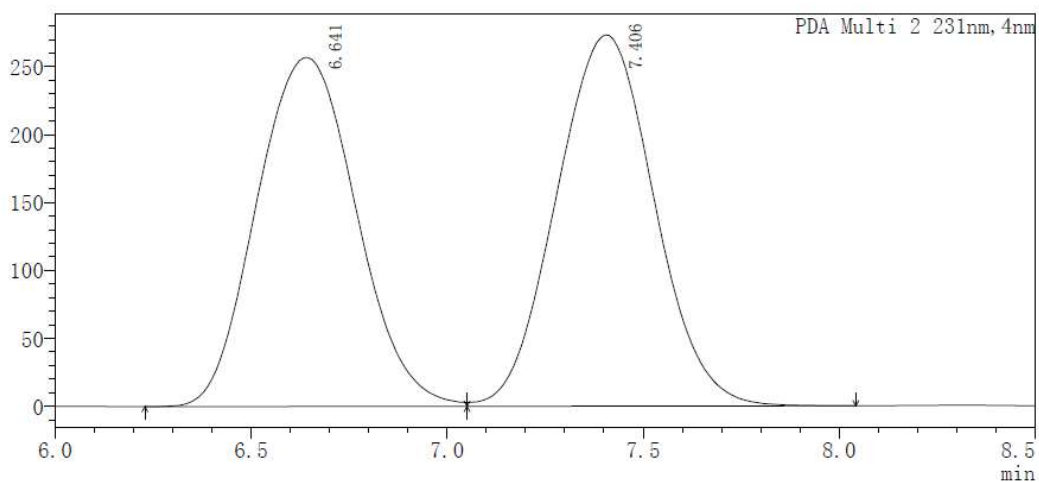

<Peak Results>

PDA Ch2 231nm

| Index | Time/min | Height/mAU | Quantity/Area | Area %/% |
|-------|----------|------------|---------------|----------|
| 1     | 6.641    | 256789     | 4540435       | 48.918   |
| 2     | 7.406    | 273140     | 4741239       | 51.082   |
